# Supplementary material
Source: PubMed Central journal article supplement (PMC4381795)

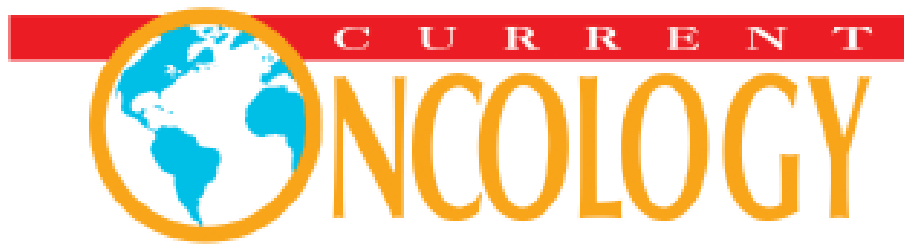

**Supplemental Materials for**

**Adjuvant chemotherapy for early female breast cancer: A systematic review of the evidence for the 2014 Cancer Care Ontario systemic therapy guideline**

S. Gandhi, G.G. Fletcher, A. Eisen, M. Mates, O. Freedman, S. Dent, and M. Trudeau

Corresponding Author: Sonal Gandhi, Sunnybrook Health Sciences, 2075 Bayview Ave, T Wing, T2-037, Toronto, ON, M4N 3M5. Email: [sonal.gandhi@sunnybrook.ca](mailto:sonal.gandhi@sunnybrook.ca)

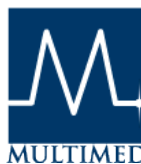

**Supplemental Table 1. Antimetabolites: CMF, capecitabine, and gemcitabine.**

| Author, year                                                           | Trial name, enrolment period | Intervention                                                                                                                                                                                  | # pts | Inclusion criteria                                                                    | Staging                         | Other characteristics*                       | Other                                                           | Results                                                                                                                                                                                                                                                                                                                                                                                                                                                                                                                                                                                                                                                                                                                                                                                                                                 |
|------------------------------------------------------------------------|------------------------------|-----------------------------------------------------------------------------------------------------------------------------------------------------------------------------------------------|-------|---------------------------------------------------------------------------------------|---------------------------------|----------------------------------------------|-----------------------------------------------------------------|-----------------------------------------------------------------------------------------------------------------------------------------------------------------------------------------------------------------------------------------------------------------------------------------------------------------------------------------------------------------------------------------------------------------------------------------------------------------------------------------------------------------------------------------------------------------------------------------------------------------------------------------------------------------------------------------------------------------------------------------------------------------------------------------------------------------------------------------|
| Amadori, 2008 <sup>1</sup><br><br>Update of Amadori, 2000 <sup>2</sup> | 1989–1993                    | CMF×6 or none after locoregional therapy (mastectomy or quadrantectomy + RT)                                                                                                                  | 278   | N0 (at least 10 nodes examined), high thymidine labeling index (TLI) ≥3.1%, age ≤70 y | 64% ≤2 cm (Stage I)             | 42% premenopausal, 65% ER+, 50% PR+          | Stratified pts according to cell proliferation evaluated by TLI | TLI 3.1%–4.4% (33.1% of pts), TLI 4.5–6.8% (33.8%), TLI >6.8 (33.1%)<br>Relapse at median follow-up of 12 y, CMF vs control:<br>Overall: HR=0.75 (95% CI 0.50–1.13), p=0.17, (NS)<br>Pts who received full CMF dose: HR=0.59 (95% CI 0.36–0.95), p=0.03<br>TLI 3.1%–4.4%: HR=1.05 (95% CI 0.45–2.49), p=0.91<br>TLI 4.5%–6.8%: HR=0.30 (95% CI 0.12–0.72), p=0.01<br>TLI>6.8 %: HR=0.79 (95% CI 0.37–1.68), p=0.53, 25% of relapses occurred within 20 mo in control and within 93 mo in CMF group<br>Death at median follow-up of 12 y, CMF vs control<br>Overall: HR=0.80 (95% CI 0.48–1.33), p=0.38<br>Pts who received full CMF dose: HR=0.57 (95% CI 0.31–1.07), p=0.08<br>TLI 3.1%–4.5%: HR=0.86 (95% CI 0.29–2.57), p=0.78<br>TLI 4.5%–6.8%: HR=0.27 (95% CI 0.08–0.83), p=0.02<br>TLI>6.8 %: HR=0.71 (95% CI 0.30–1.73), p=0.46 |
| Taucher, 2008 <sup>3</sup>                                             | ABCSG-07<br>1991–1999        | CMF timing: CMF×3 preoperative vs CMF×3 post-operative<br>All received additional therapy determined by histological nodal status (3×CMF if N0 or 3×EC if N+)<br>All had axillary dissection, | 398   | HR–1991–99; high-risk (N1)<br>HR+ 1996–99                                             | 24% T1, 65% T2, 9% T3; N0–1, M0 | 9% ER+, 15% PR+<br>64% N0, 49% premenopausal | Biopsy proven cancer and/or cN+                                 | OS not affected by therapy group: HR=0.800 (95% CI 0.563–1.136), p=0.213<br>Recurrence after median follow-up 9 y:<br>RFS: HR=0.7 (95% CI 0.52–0.96), p=0.024 favouring postop treatment, although rates of local recurrence (13.3 vs 8.2%, p=0.1) and distant metastases (30.5% vs 22.6%, p=0.07) for pre and postoperative groups were not                                                                                                                                                                                                                                                                                                                                                                                                                                                                                            |

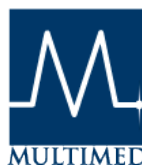

| Author, year                 | Trial name, enrolment period | Intervention                                                                                                                                                                                                                  | # pts                              | Inclusion criteria | Staging                 | Other characteristics*                         | Other                                             | Results                                                                                                                                                                                                                                                                                                                                                                                                                                                                                                                                                                                                                                                                                                                                                         |
|------------------------------|------------------------------|-------------------------------------------------------------------------------------------------------------------------------------------------------------------------------------------------------------------------------|------------------------------------|--------------------|-------------------------|------------------------------------------------|---------------------------------------------------|-----------------------------------------------------------------------------------------------------------------------------------------------------------------------------------------------------------------------------------------------------------------------------------------------------------------------------------------------------------------------------------------------------------------------------------------------------------------------------------------------------------------------------------------------------------------------------------------------------------------------------------------------------------------------------------------------------------------------------------------------------------------|
|                              |                              | BCS +RT or modified radical mastectomy (+RT at physician's discretion)                                                                                                                                                        |                                    |                    |                         |                                                |                                                   | significantly different                                                                                                                                                                                                                                                                                                                                                                                                                                                                                                                                                                                                                                                                                                                                         |
| Muss, 2009 <sup>4</sup>      | CALGB 49907<br>2001–2006     | Std chemotherapy (CMF×6 or AC×4) vs capecitabine×6<br>Axilla treated at discretion of patient and surgeon<br>HR+ offered tamoxifen or AI after chemotherapy<br>Trastuzumab recommended in last year (2006 ) for HER2+ tumours | 633<br>(ended early due to safety) | Age ≥65 y          | I, II, IIA, IIIB; >1 cm | 10% HER2+,<br>67% HR+,<br>70% N+,<br>55% >2 cm | Operable, histologically confirmed adenocarcinoma | At median follow-up of 2.4 y:<br><ul style="list-style-type: none"> <li>RFS: 80% capecitabine, 89% std chemotherapy</li> <li>OS: 88% capecitabine, 93% std chemotherapy</li> </ul> Estimated at 3 y:<br><ul style="list-style-type: none"> <li>RFS: 68% capecitabine, 85% std chemotherapy, HR=2.09, p&lt;0.001</li> <li>OS: 86% capecitabine, 91% std chemotherapy; HR=1.85, p=0.02</li> <li>HR- subgroup with capecitabine vs all others: risk of relapse HR=4.39 (95% CI 2.9–6.7, p&lt;0.001); risk of death HR=3.76 (95% CI 2.23–6.34, p&lt;0.001)</li> <li>Adverse effects (grade 3–4 events): 70% CMF, 60% doxorubicin, 34% capecitabine</li> <li>Adverse effects (hematological grade 3–4 effects): 52% CMF, 54% doxorubicin, 2% capecitabine</li> </ul> |
| Kornblith, 2011 <sup>5</sup> | CALGB 49907<br>2001–2006     | See preceding entry (QoL substudy)                                                                                                                                                                                            | 350                                |                    |                         |                                                |                                                   | Pts with capecitabine had significantly better QoL, role function, social function, appetite, and less systemic adverse effects, psychological distress, fatigue, nausea, vomiting or constipation; capecitabine was worse for hand-foot syndrome and diarrhea. QoL similar at 1 y. Concluded std chemotherapy is better than capecitabine to improve RFS and OS, and survival rate effects outweigh short-term adverse effects                                                                                                                                                                                                                                                                                                                                 |



| Author, year                   | Trial name, enrolment period                                                                          | Intervention                                                                                                                                                                                                                                                                                                                                                                                                                                                                              | # pts                         | Inclusion criteria                                                               | Staging                                                                 | Other characteristics*                                  | Other                                                                                                          | Results                                                                                                                                                                                                                                                                                                                                                                                                                                                                                                                                                                                                      |
|--------------------------------|-------------------------------------------------------------------------------------------------------|-------------------------------------------------------------------------------------------------------------------------------------------------------------------------------------------------------------------------------------------------------------------------------------------------------------------------------------------------------------------------------------------------------------------------------------------------------------------------------------------|-------------------------------|----------------------------------------------------------------------------------|-------------------------------------------------------------------------|---------------------------------------------------------|----------------------------------------------------------------------------------------------------------------|--------------------------------------------------------------------------------------------------------------------------------------------------------------------------------------------------------------------------------------------------------------------------------------------------------------------------------------------------------------------------------------------------------------------------------------------------------------------------------------------------------------------------------------------------------------------------------------------------------------|
| Ejlertsen, 2010 <sup>6</sup>   | DBCG 77B<br>1977-83                                                                                   | CMF (N=423) vs cyclophosphamide (N=424) vs levamisole (N=112) vs no adjuvant systemic therapy (RT only, N=187)<br>CMF was oral C at 80 mg/m <sup>2</sup> on days 1-14, IV M at 30 mg/m <sup>2</sup> and F at 500 mg/m <sup>2</sup> on days 1-8; q28d×12); C only as for CMF but 130 mg/m <sup>2</sup> ; levamisole 5 mg/w×48 w<br>All received radiotherapy to chest wall and regional lymph nodes<br>Endocrine therapy not permitted                                                     | 1146                          | Premenopausal; N+ or >5 cm or invasion of deep fascia with no distant metastasis | high-risk; 17% N0, 56% N1, 27% N2+; 25% T1, 37% T2, 13% T3, 24% unknown | hormone receptor status unknown for 70% of pts; 22% HR+ | All had mastectomy + axillary sampling or clearance before chemotherapy                                        | Levamisole arm closed early (1979) due to adverse effects, and resulted in closure of control arm as well in 1981<br>10-y survival rates: CMF 62%, C 60%, L 41%, Control 46%;<br>C vs control: HR=0.70, p=0.02; CMF vs control: HR=0.70, p=0.02, C vs CMF: no difference (HR=1.11, p=0.32)<br>Invasive DFS: CMF 49%, C 56%, L 35%, Control 39%<br>OS benefit persisted at 25-y follow-up when adjusted for baseline characteristics:<br>C vs control: HR=0.66, p=0.002;<br>CMF vs control: HR=0.59, p=0.0001                                                                                                 |
| Ejlertsen, 2008 <sup>7,8</sup> | DBCG 77B, 82B, 89B, 89D<br><br>Results of all studies previously reported separately<br><br>1977-2001 | Retrospective unplanned cross-trial comparison of higher-dose classic vs lower-dose IV CMF (CMF +RT dose and schedule)<br><br>• <b>DBCG 77B</b> : see Ejlertsen 2010; used classic CMF<br>• <b>DBCG 82B</b> : CMF +RT, CMF, CMF + tamoxifen<br>•(IV CMF at 600, 40, 600 mg/m <sup>2</sup> q4w×8 except with delay after first cycle to administer RT)<br>• <b>DBCG 89B</b> : HR+: RT + OA vs RT +CMF (CMF q3w×9)<br>• <b>DBCG 89D</b> : HR-: RT + CMF vs RT + CEF; (CMF q3w×9); secondary | 5652 (2113 received CMF + RT) | Premenopausal, N+                                                                | 65% N1, 27% N2, 8% N3<br><br>43% T1<br>44% T2<br>9% T3                  |                                                         | Data on those administered CMF combined from 4 studies of DBCG, N+ data only, exclude those on tamoxifen or OA | 10-y survival rates after CMF were 48% with classic CMF, 45% administered every 4 w, 47% administered every 3 w; after adjusting in multivariate analysis was 30% increase in risk of recurrence in 3- or 4-weekly regimen compared with classic CMF<br><br>Effect was age dependent (p<0.01): pts aged <40 y did better in the 77 cohort, whereas those aged >50 y did better in 89 cohort, authors suggested may be endocrine effect because for those aged <40 y classic CMF resulted in 15% regular menses, whereas this was 47% in the 89 cohort; interpret with caution due to non-experimental design |

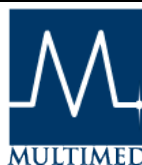

| Author, year                                                                              | Trial name, enrolment period    | Intervention                                                                           | # pts                   | Inclusion criteria                                 | Staging                                    | Other characteristics*      | Other                                                                       | Results                                                                                                                                                                                                                                                                                                                                                                                                                                                                                                     |
|-------------------------------------------------------------------------------------------|---------------------------------|----------------------------------------------------------------------------------------|-------------------------|----------------------------------------------------|--------------------------------------------|-----------------------------|-----------------------------------------------------------------------------|-------------------------------------------------------------------------------------------------------------------------------------------------------------------------------------------------------------------------------------------------------------------------------------------------------------------------------------------------------------------------------------------------------------------------------------------------------------------------------------------------------------|
|                                                                                           |                                 | randomization to pamidronate for 4 y permitted.                                        |                         |                                                    |                                            |                             |                                                                             |                                                                                                                                                                                                                                                                                                                                                                                                                                                                                                             |
| Joensuu, 2012 <sup>9</sup>                                                                | FinXX, NCT00114816<br>2004–2007 | Capecitabine TXx3→ CEXx3 vs Tx3→ CEFx3                                                 | 1500                    | N+ (89%), or N0 if >20 mm and PR- (11%)            | 44% pT1, 50% pT2, 5% pT3; [mostly IIA–IIB] | 77% ER+, 62% PR+, 19% HER2+ | Histologically confirmed invasive, excluded if had neoadjuvant chemotherapy | 5–y RFS 87% for TX/CEX vs 84% for T/CEF, HR=0.79 (95% CI 0.60 to 1.04), p=0.087<br>56 pts assigned to TX→ CEX died during the follow-up compared to 75 pts assigned to T→ CEF, HR=0.73 (95% CI 0.52–1.04), p=0.08<br>In exploratory (subgroup) analyses, TX→ CEX improved breast cancer-specific survival rate (HR=0.64, p=0.027) and RFS rates (HR=0.64, 95% CI 0.43–0.96) in female pts with triple-negative disease and in female pts who had >3metastatic axillary lymph nodes at the time of diagnosis |
| Canney 2012, 2014 <sup>10-12</sup><br><br>Velikova 2014 <sup>13</sup><br>[abstracts only] | TACT2, CRUK/05/019<br>2005–2008 | Accelerated E (aE) + pegfilgrastim vs E; then X vs classic CMF<br><br>E-CMF is control | 4371 female pts, 20 men | N+ or high risk<br>N0 invasive early breast cancer |                                            |                             | 1 y trastuzumab if HER2+;<br>5 y endocrine therapy if HR+                   | <ul style="list-style-type: none"> <li>• Median follow-up 61 mo, X vs CMF:</li> <li>• TTR events: 14.0% vs 14.4%, HR=0.98 (95% CI 0.84–1.15), p=0.79</li> <li>• OS: HR=1.00 (95% CI 0.84–1.20)</li> <li>• DFS: HR=0.99 (95% CI 0.86–1.15)</li> <li>• Fewer serious adverse effects (except diarrhea and PPE) and better global QoL with X than CMF</li> <li>• Concluded X non-inferior efficacy but</li> </ul>                                                                                              |



| Author, year                                                                  | Trial name, enrolment period                | Intervention                                                                                                                                                   | # pts | Inclusion criteria                                                     | Staging                    | Other characteristics*                       | Other                                                                     | Results                                                                                                                                                                                                                                                                                                                                                                                                                                                                                                                                                                                                                                                                                                                                                                                                                                                                                                                                                                                                                    |
|-------------------------------------------------------------------------------|---------------------------------------------|----------------------------------------------------------------------------------------------------------------------------------------------------------------|-------|------------------------------------------------------------------------|----------------------------|----------------------------------------------|---------------------------------------------------------------------------|----------------------------------------------------------------------------------------------------------------------------------------------------------------------------------------------------------------------------------------------------------------------------------------------------------------------------------------------------------------------------------------------------------------------------------------------------------------------------------------------------------------------------------------------------------------------------------------------------------------------------------------------------------------------------------------------------------------------------------------------------------------------------------------------------------------------------------------------------------------------------------------------------------------------------------------------------------------------------------------------------------------------------|
|                                                                               |                                             |                                                                                                                                                                |       |                                                                        |                            |                                              |                                                                           | <p>superior tolerability</p> <ul style="list-style-type: none"> <li>• Median follow-up of 49 mo, aE vs E <ul style="list-style-type: none"> <li>• TTR: 3-y recurrence rates 91.0% vs 90.9%, 5-y recurrence rates 86.4% vs 85.2%; HR=0.96</li> <li>• OS 94.4% vs 95.4% at 5 y (p=0.23)</li> </ul> </li> <li>• After 4 cycles, more nausea, vomiting, appetite loss, constipation, systemic adverse effects and deterioration of functioning (global QoL, role function) with aE than E, but these did not persist to 12 or 24 mo.</li> <li>• At end of 8 cycles, CMF had more adverse effects than with X (fatigue, dyspnea, insomnia, constipation, systemic side-effects, deterioration of functioning ) and these (e.g., fatigue) often persisted to 24 mo</li> <li>• Impact on menstruation assessed at 18 mo for premenopausal aged &lt;50 y (N=1622): E→ X has lower risk of permanent loss of menstrual function than E→ CMF (28% vs 69%); aE vs E had more short-term amenorrhea but effect lost by 18 m</li> </ul> |
| Ohno 2013 <sup>14</sup>                                                       |                                             | Neoadjuvant FEC then randomized to TX vs T                                                                                                                     | 477   | Operable, age 20–70 y; T1C–3, N0, MO >1 cm; or T1–3, N1, MO            | 43% IIA, 45% IIB, 11% IIIA | Excluded pts with disease progression on FEC | Relative dose intensity of T was lower in TX group due to adverse effects | <p>Powered for pCR difference pCR 23% vs 24% (p=0.748)</p> <p>At median follow-up 4.5 y, 3–y DFS rates 92.7% vs 90.7%, HR=0.910 (95% CI 0.551–1.502); OS HR=0.671 (95% CI 0.303–1.488)</p>                                                                                                                                                                                                                                                                                                                                                                                                                                                                                                                                                                                                                                                                                                                                                                                                                                 |
| Pippen, 2011 <sup>15</sup><br>O'Shaughnessy, 2010 <sup>16</sup><br>[abstract] | US Oncology 1062<br>USON 01062<br>2002–2006 | AC→ T vs AC→ TX<br><br>AC→ T: A (60 mg/m <sup>2</sup> ) + C (600 mg/m <sup>2</sup> ) q3w×4→ T (100 mg/m <sup>2</sup> ) q3w×4<br>AC→ TX: AC as in other arm→ TX | 2611  | Resectable, early, high risk (N+, T1–3; or N0, T2+; or N0, >1 cm, HR–) |                            |                                              | Tamoxifen or AI for 5 y if HR+; After 2005, HER2+ offered 1 y trastuzumab | <p>Median follow-up of 5 y, 304 events</p> <p>DFS: HR=0.84 (95% CI 0.67–1.05), p=0.125 [endpoint not met]</p> <p>Distant DFS favoured TX group: HR=0.80 (95% CI 0.63–1.02), p=0.067</p> <p>OS: improvement with TX vs T: HR=0.68 (95% CI 0.51–0.92), p=0.011</p>                                                                                                                                                                                                                                                                                                                                                                                                                                                                                                                                                                                                                                                                                                                                                           |



| Author, year                                 | Trial name, enrolment period | Intervention                                                                                                                                                           | # pts | Inclusion criteria | Staging                                 | Other characteristics*                                                                         | Other                                                                | Results                                                                                                                                                                                                                                                                                                                                                                                                                                                                                                           |
|----------------------------------------------|------------------------------|------------------------------------------------------------------------------------------------------------------------------------------------------------------------|-------|--------------------|-----------------------------------------|------------------------------------------------------------------------------------------------|----------------------------------------------------------------------|-------------------------------------------------------------------------------------------------------------------------------------------------------------------------------------------------------------------------------------------------------------------------------------------------------------------------------------------------------------------------------------------------------------------------------------------------------------------------------------------------------------------|
|                                              |                              | (T: 75 mg/m <sup>2</sup> day 1, X: 825 mg/m <sup>2</sup> bid, days 1–14;) [4 cycles ?]                                                                                 |       |                    |                                         |                                                                                                |                                                                      | <p>Subgroup analysis appeared to favour TX over T</p> <p>Unplanned subset analysis of Ki-67 expression and DFS suggests benefit of X in more highly proliferative tumours ( for Ki-67 &gt;10%, hazard ratio for TX vs T is HR=0.70 (95% CI 0.50–0.98) for DFS and HR=0.52 (95% CI 0.33–0.82) for OS</p> <p>Adverse events similar in both arms, except grade 3 hand-foot syndrome (3.8% T vs 18.1% TX), grade 3/4 stomatitis (4.5% vs 9.1%), diarrhea (2.9% vs 5.1%), and febrile neutropenia (13.1% vs 9.4%)</p> |
| O'Shaughnessy, 2012 <sup>17</sup> [abstract] | USON 01062                   | See previous entry in table                                                                                                                                            |       |                    |                                         | 2195 ductal<br>355 lobular or mixed                                                            |                                                                      | <p>Exploratory analysis by histology:</p> <ul style="list-style-type: none"> <li>• ductal pts <u>AC→T</u> vs <u>AC→XT</u>: <ul style="list-style-type: none"> <li>• no difference in DFS (HR=0.92, p=0.48) or OS (HR=0.75, p=0.07)</li> </ul> </li> <li>• lobular/mixed <u>AC→XT</u> vs <u>AC→T</u> <ul style="list-style-type: none"> <li>• DFS, HR=0.55, p=0.055</li> <li>• OS, HR=0.38, p=0.04</li> </ul> </li> </ul>                                                                                          |
| Bermejo, 2013 <sup>18</sup>                  | GEICAM/2003–10<br>2004–2007  | ET→X vs EC→T<br>ET (90/75 mg/m <sup>2</sup> )q3wx4→X (1250 mg/m <sup>2</sup> bid d1–14) q3wx4<br>EC (90/600 mg/m <sup>2</sup> ) q3wx4→T (100 mg/m <sup>2</sup> ) q3wx4 | 1384  | T1–3/N1–3 operable | 66% N1, 25% N2, 9% N3                   | Stratified by site, menopausal status, number of nodes (1–3, 4–9, 9+), hormone receptor status | HER2+ pts excluded after first 803 pts recruited; 84% HR+, 11% HER2+ | <p>After median follow-up 6.6 y, survival rates at 5 y:</p> <ul style="list-style-type: none"> <li>• DFS: 82% EC→X vs 86% EC→T, HR=1.314 (95% CI 1.042–1.657), p=0.0208</li> <li>• OS not different: HR=1.113 (95% CI 0.809–1.531), p=0.511</li> </ul> <p>EC→X vs EC→T : Neutropenia 10% vs 19%, hand-foot syndrome 20% vs 2%, diarrhea 11% vs 3%</p>                                                                                                                                                             |
| Watanabe, 2009 <sup>19</sup>                 | N-SAS BC 01<br>1996–2001     | Oral uracil and tegafur (UFT) daily for 2 y vs CMF×6                                                                                                                   | 707   | N0, Stage I–IIIA   | 42% T1, 54% T2, 5% T3<br><br>[96% Stage | 62% ER+ and/or PR+; 42% premenopausal                                                          | Authors considered "high risk" but no reason reported                | <p>RFS at 5 y: 88.0% CMF vs 87.8% UFT, HR=0.98 (95% CI 0.66–1.45), p=0.92</p> <p>OS: 96.0% vs 96.2%, HR=0.81 for OS (95% CI 0.44 to 1.48), p=0.49</p> <p>The adverse effects profiles differed between the two groups</p>                                                                                                                                                                                                                                                                                         |

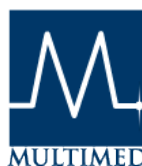

| Author, year                              | Trial name, enrolment period | Intervention                                                                                                                                                                     | # pts        | Inclusion criteria                          | Staging                                  | Other characteristics*                             | Other                                                                    | Results                                                                                                                                                                                                                                                                                                                                         |
|-------------------------------------------|------------------------------|----------------------------------------------------------------------------------------------------------------------------------------------------------------------------------|--------------|---------------------------------------------|------------------------------------------|----------------------------------------------------|--------------------------------------------------------------------------|-------------------------------------------------------------------------------------------------------------------------------------------------------------------------------------------------------------------------------------------------------------------------------------------------------------------------------------------------|
|                                           |                              |                                                                                                                                                                                  |              |                                             | I-IIA]                                   |                                                    |                                                                          | QoL scores were better for pts administered UFT than for those administered CMF (p<0.05 for social functioning, nausea/vomiting, constipation, systemic adverse effects, hair loss)                                                                                                                                                             |
| Hara 2012 <sup>20</sup><br>[abstract]     | N-SAS BC 01                  | See previous entry in table<br>Subgroup of older pts (aged ≥65 y)                                                                                                                | 97           |                                             |                                          |                                                    |                                                                          | 5-y RFS (UFT vs CMF): 93.0% vs 92.5%, HR=1.07 (95% CI 0.31–3.55)<br>OS: 97.7% vs 98.1%, HR=1.07 (95% CI 0.15–10.25)<br>Grade 3/4 leukopenia 0% vs 3.8%, neutropenia 4.8% vs 13.5%; grade 3/4 increased liver enzyme and nausea/vomiting less frequent with UFT; more elevated bilirubin and diarrhea observed in UFT arm; UFT better QoL scores |
| Ejlertsen, 2013 <sup>21</sup>             | DBCG 82c<br>1982–1990        | CMF (IVx9) + tamoxifen vs tamoxifen (30 mg/d for 1 y)                                                                                                                            | 1445         | Postmenopausal ;N+, deep invasion, or >5 cm |                                          | 55% N1, 34% N2+<br>37% T1, 50% T2, 12% T3          | Mastectomy + axillary sampling or clearance (level 1 + part of level II) | Analysis 20 y after recruitment closed; median follow-up 10 y DFS, 24 y OS<br>DFS (CMFT vs CMF): HR=0.89 (95% CI 0.78–1.01), p=0.08 [ITT]<br>DFS adjusted: HR=0.82 (95% CI 0.71–0.93), p=0.003<br>OS: no difference, HR=0.96 (95% CI 0.86–1.08), p=0.51                                                                                         |
| Colleoni 2011 <sup>22</sup><br>[abstract] | IBCSG 22–00                  | Study of low-dose maintenance/metronomic CM after surgery + chemo<br>-Randomized to 12 mo CM vs no CM                                                                            | 1080 planned | ER–PR– (<10%), known HER2 status            |                                          | Stratified by menopausal status, induction regimen | Concurrent trastuzumab permitted if HER2+                                | Ongoing                                                                                                                                                                                                                                                                                                                                         |
| Wardley, 2008 <sup>23</sup>               | tAnGo<br>2000–               | EC→ G + P vs EC→ P<br><br>E 90 mg/m <sup>2</sup> + C 600 mg/m <sup>2</sup> q3wx4→ [ P 175 mg/m <sup>2</sup> q3h infusion day 1 and G 1250 mg/m <sup>2</sup> days 1 and 8] q3 wx4 | 3000         |                                             | Substudy:<br>19% N0<br>35% N1<br>46% N2+ | Substudy:<br>20% ER+<br>15% PR+                    |                                                                          | Ongoing, no survival rate results                                                                                                                                                                                                                                                                                                               |





| Author, year                          | Trial name, enrolment period | Intervention                                                                                                                                                                                                                            | # pts | Inclusion criteria                                                                 | Staging                                                                    | Other characteristics*                                                                  | Other | Results                                                                                                                                                                                                                                                                                                                                                                                                                                                                                                                                                                                                            |
|---------------------------------------|------------------------------|-----------------------------------------------------------------------------------------------------------------------------------------------------------------------------------------------------------------------------------------|-------|------------------------------------------------------------------------------------|----------------------------------------------------------------------------|-----------------------------------------------------------------------------------------|-------|--------------------------------------------------------------------------------------------------------------------------------------------------------------------------------------------------------------------------------------------------------------------------------------------------------------------------------------------------------------------------------------------------------------------------------------------------------------------------------------------------------------------------------------------------------------------------------------------------------------------|
| Earl, 2014 <sup>24</sup>              | Neo-tAnGo                    | Neoadjuvant:<br>EC→ P vs P→ EC vs EC→ PG vs PG→ EC<br>Effect of gemcitabine and role of sequence (EC→ P vs P→ EC)<br>Stratified by ER status, tumour size (50 mm cut-off), nodal status (N0/N+), inflammatory/locally advanced (yes/no) | 831   | Early invasive, >2 cm; no previous chemo, RT, endocrine therapy<br><br>T4 eligible | 80% T2, 20% T3<br>50% N+                                                   | 67% ER+<br>51% PR+<br>25% inflammatory or LABC;<br>57% premenopausal, 5% perimenopausal |       | Median follow-up 47 mo; first planned interim analysis found no significant difference in DFS or OS<br><ul style="list-style-type: none"> <li>•DFS : EC→ P vs EC→ PG, HR=1.13 (95% CI 0.88–1.46), p=0.34</li> <li>•DFS: P→ EC vs EC→ P, HR=0.84 (95% CI 0.65–1.09), p=0.18</li> <li>•OS: EC→ P vs EC→ PG, HR=1.02 (95% CI 0.76–1.39), p=0.89</li> <li>•OS: P→ EC vs EC→ P, HR=0.82 (95% CI 0.60–1.11), p=0.19</li> <li>•pCR greater with P→ EC than EC→ P (20% vs 15%, p=0.03); G did not increase pCR</li> <li>•pCR was correlated with significant improvement in DFS (p&lt;0.0001) and OS (p=0.0007)</li> </ul> |
| Toi, 2012 <sup>25</sup><br>[abstract] | OOTR N0003                   | Neoadjuvant study<br>FEC→ TX vs FEC→ T                                                                                                                                                                                                  | 504   | Operable, T1C–3N0M0/<br>T1–3N1M0                                                   |                                                                            | Median 3.5 cm, 56% N+                                                                   |       | Discontinued in 22% TX and 5% T groups (p<0.0001)<br>Median follow-up 3.7 y, DFS 92% TX vs 91% T, HR=0.907 (95% CI 0.528–1.557), p=0.723<br>More hand-foot syndrome with TX (15% vs 2%)<br>Concluded adding X to T not superiority to T alone following FEC                                                                                                                                                                                                                                                                                                                                                        |
| Schneeweiss 2011 <sup>26</sup>        | 2005–2007                    | Pemetrexedx4 vs cyclophosphamidex4<br><br>Doxorubicin + pemetrexed→ docetaxel vs doxorubicin + cyclophosphamide→ docetaxel                                                                                                              | 257   | Operable T2–T4a–c, N0–2, M0                                                        | 30% IIA, 46% IIB, 17% IIIA, 8% IIIB<br>39% N0<br>6% T1<br>38% T2<br>37% T3 | 66% HR+<br>15% HER2+                                                                    |       | Ongoing, no survival rate results                                                                                                                                                                                                                                                                                                                                                                                                                                                                                                                                                                                  |



Abbreviations: AC, doxorubicin + cyclophosphamide; aE, accelerated epirubicin; AI, aromatase inhibitor; BCS, breast-conserving surgery; C, cyclophosphamide; CEF, cyclophosphamide + epirubicin+ fluorouracil; CEX, cyclophosphamide + epirubicin + capecitabine; CMF, cyclophosphamide + methotrexate + fluorouracil; DFS, disease-free survival rate; E, epirubicin; ER, estrogen receptor; EC, epirubicin + cyclophosphamide; F, 5-fluorouracil; FEC, fluorouracil + epirubicin + cyclophosphamide; G, gemcitabine; HR+, hormone receptor positive; HR-, hormone receptor negative; IDFS, invasive disease-free survival rate; ITT, intention to treat; LABC, locally advanced breast cancer; M, methotrexate; N0, node-negative; N+, nod-positive; OA, ovarian ablation; OS, overall survival rate; P, paclitaxel; pCR, pathologically complete response; PG, paclitaxel + gemcitabine; pts, patients; PR, progesterone receptor; QoL, quality of life; RFS, recurrence-free survival rate; RT, radiation therapy; T, docetaxel (Taxotere); TTR, time to recurrence; TX, docetaxel + capecitabine; TLI, thymidine labeling index; UFT, oral uracil and tegafur; X, capecitabine

\* HER2, ER/PR, risk, menopausal status



**Supplemental Table 2. Anthracyclines: Doxorubicin and epirubicin.**

| Author, year                    | Trial name, enrolment period | Intervention                                                  | # pts | Inclusion criteria                                                                                                      | Staging                                                                                          | Other characteristics*                              | Other                                                                                                                                                             | Results                                                                                                                                                                                                                                                                                                                                                                                                                                                                                                                                                    |
|---------------------------------|------------------------------|---------------------------------------------------------------|-------|-------------------------------------------------------------------------------------------------------------------------|--------------------------------------------------------------------------------------------------|-----------------------------------------------------|-------------------------------------------------------------------------------------------------------------------------------------------------------------------|------------------------------------------------------------------------------------------------------------------------------------------------------------------------------------------------------------------------------------------------------------------------------------------------------------------------------------------------------------------------------------------------------------------------------------------------------------------------------------------------------------------------------------------------------------|
| de Azambuja, 2009 <sup>27</sup> | 1988–1996                    | CMF vs EC vs high-dose EC (HEC)<br><br>CMFx6 vs ECx8 vs HECx8 | 777   | N+ (≥10 nodes resected), age ≤70 y, operable breast cancer (mastectomy or lumpectomy + ALND)                            | 60 % N1,<br>40% N2+<br><br>43% pT1,<br>39% pT2,<br>2% pT3,<br>16% unknown                        | 54% ER+, 30% ER-, 16% unknown;<br>58% premenopausal | Tamoxifen for 5 y if ER+ or unknown and postmenopausal; RT after BCS; PMRT depended on centre's policy                                                            | <ul style="list-style-type: none"> <li>•15-y EFS was 45% for CMF, 39% for EC, 50% for HEC</li> <li>•HEC vs EC: HR=0.77 (95% CI 0.60–0.98), p=0.03</li> <li>•HEC vs CMF: HR=0.90 (95% CI 0.7–1.15), p=0.39</li> <li>•EC vs CMF: HR=0.86 (95% CI 0.67–1.09), p=0.21</li> <li>•No difference in OS</li> <li>•Cardiac adverse effects more frequent with HEC than with CMF (p=0.006) but not more than with EC (p=0.21)</li> </ul>                                                                                                                             |
| Kimura, 2010 <sup>28</sup>      | 1996–2000                    | CEF vs CMF post-surgery                                       | 294   | N+, ALND, no previous systemic therapy or RT, exclude BCS                                                               | I–IIIA:<br>68% II,<br>25% IIIA;<br>32% N1,<br>42% N2,<br>26% N3;<br>11% T1,<br>64% T2,<br>17% T3 | 61% premenopausal, 53% ER+, 48% PR+                 | Tamoxifen for 2 y if ER+ or ER unknown; did not meet intended sample size of 700                                                                                  | <ul style="list-style-type: none"> <li>•5-y survival rate 77.1% for CEF and 71.4% for CMF, HR=0.79 (95% CI 0.50–1.24), p=0.24</li> <li>•5-y DFS 55.7% for CEF and 48.9% for CMF, HR=0.80 (95% CI 0.57–1.12), p=0.15</li> <li>•Adverse drug reactions more common with CEF</li> <li>•Study had insufficient power to prove significance of trends</li> </ul>                                                                                                                                                                                                |
| Amadori, 2011 <sup>29</sup>     | 1997–2004                    | E → CMF vs CMF → E (after radical resection)                  | 878   | Rapidly proliferating breast cancer (TLI >3% or histological grade 3 or S phase >10% or Ki-67 >20%); N1 or N0 and >1 cm | 53% N0,<br>23% N1,<br>13% N2,<br>10% N3;<br><br>49% pT1,<br>46% pT2,<br>5% pT3–4                 | 47% premenopausal, 62% ER+, 50% PR+, 44% HER2+      | ER+ received tamoxifen for 5 y after chemotherapy, GnRH optional in premenopausal pts not achieving amenorrhea; RT administered after BCS; PMRT for pT3–4 tumours | <p>At a median follow-up of 69 m:</p> <ul style="list-style-type: none"> <li>•5-y OS 91% (88%–94%) for E → CMF and 93% (90%–95%) for CMF → E, with adjusted HR=0.88 (95% CI 0.58–1.35)</li> <li>•DFS 80% in both arms, adjusted HR=0.99 (95% CI 0.73–1.33)</li> <li>•Adverse events were similar, apart from a higher rate of neutropenia in the CMF → E arm (12% vs 7.5%, p=0.03).</li> <li>•No important differences in clinical outcome were observed between the two different sequences, making both a valid option in early breast cancer</li> </ul> |

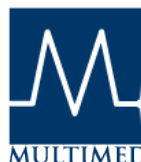

| Author, year               | Trial name, enrolment period   | Intervention                                                                                                                                               | # pts                  | Inclusion criteria | Staging                                              | Other characteristics* | Other                                                                                                                                                                                                    | Results                                                                                                                                                                                                                                                                                                                                                                                                                                                                                                                                                                                                                                                                                                                                                                                                                                                                           |
|----------------------------|--------------------------------|------------------------------------------------------------------------------------------------------------------------------------------------------------|------------------------|--------------------|------------------------------------------------------|------------------------|----------------------------------------------------------------------------------------------------------------------------------------------------------------------------------------------------------|-----------------------------------------------------------------------------------------------------------------------------------------------------------------------------------------------------------------------------------------------------------------------------------------------------------------------------------------------------------------------------------------------------------------------------------------------------------------------------------------------------------------------------------------------------------------------------------------------------------------------------------------------------------------------------------------------------------------------------------------------------------------------------------------------------------------------------------------------------------------------------------|
| Rocca 2014 <sup>30</sup>   |                                | See previous entry in table Amadori <sup>29</sup><br>E→ CMF vs CMF→ E vs CMF×6<br>( E×4 and CMF×4)                                                         | 1066<br>(705 analyzed) |                    |                                                      |                        | Combined E→ CMF and CMF→ E arms (E/CMF)<br>Post-hoc analysis by tumour biomarkers HR, Ki-67, HER2 for 705 pts                                                                                            | E/CMF arms vs CMF:<br><ul style="list-style-type: none"> <li>• DFS: 84% vs 73%, HR=0.54, p=0.0006</li> <li>• OS: 94% vs 87%, HR=0.44, p=0.0009</li> </ul> Subgroup DFS, E/CMF vs CMF alone: <ul style="list-style-type: none"> <li>• Ki-67 low: 89% vs 85%, HR=0.55, p=0.116</li> <li>• Ki-67 high: 82% vs 68%, HR=0.53, p=0.002</li> <li>• HER2-: 86% vs 74%, HR=0.50, p=0.001</li> <li>• HER2+: 81% vs 71%, HR=0.64, p=0.147</li> <li>• ER+: 86% vs 81%, HR=0.61, p=0.047</li> <li>• ER-: 81% vs 63%, HR=0.51, p=0.008</li> <li>• PR+: 88% vs 82%, HR=0.65, p=0.151</li> <li>• PR-: 81% vs 65%, HR=0.51, p=0.002</li> <li>• ER+ and/or PR+: 85% vs 80%, HR=0.61, p=0.036</li> <li>• Triple Negative: 85% vs 55%, HR=0.33, p=0.0007</li> <li>• ER-PR-HER2+: 75% vs 71%, HR=1.10, p=0.840</li> <li>• ER-PR-Ki-67 &gt;20%: 82% vs 58%, HR=0.45, p=0.005</li> </ul>                 |
| Cheang, 2012 <sup>31</sup> | NCIC.CTG MA.5<br><br>1989-1993 | CEF + antibiotic prophylaxis vs CMF<br><br>Prognostic impact of intrinsic subtype and interaction with treatment; determined by PAM50 gene-expression test | 716                    | Pre-menopausal, N+ | 39% T1, 49% T2, 5% T3, 7% unknown<br>61% N1, 39% N2+ |                        | 60% ER+, 28% ER-, 12% ER unknown<br>20% HER2+, 80% HER2- (HER2 measured only in subset with PAM50 test)<br><br><u>PAM50 determined</u><br><u>Intrinsic subtype (N=476)</u><br>HER2-E (HER2 enriched) 22% | Multivariable regression results for intrinsic subgroups determined by PAM50, adjusted for clinicopathological variables<br><ul style="list-style-type: none"> <li>• <b>Overall, CEF vs CMF (N=454)</b> <ul style="list-style-type: none"> <li>• RFS: HR=0.87 (95% CI 0.67-1.12)</li> <li>• OS: HR=0.98 (95% CI 0.74-1.31)</li> </ul> </li> <li>• <b>HER2-E (N=105)</b> <ul style="list-style-type: none"> <li>• RFS HR=0.56 (95% CI 0.34-0.93)</li> <li>• OS HR=0.62 (95% CI 0.36-1.05)</li> </ul> </li> <li>• <b>Non-HER2-E (N=350)</b> <ul style="list-style-type: none"> <li>• RFS HR=1.02 (95% CI 0.76-1.38)</li> <li>• OS HR=1.22 (95% CI 0.86-1.74)</li> </ul> </li> <li>• <b>Basal (N=94)</b> <ul style="list-style-type: none"> <li>• RFS HR=1.12 (95% CI 0.60-2.08)</li> <li>• OS HR=1.32 (95% CI 0.71-2.46)</li> </ul> </li> <li>• <b>Non-basal (N=361)</b></li> </ul> |



MULTIMED

| Author, year                                                  | Trial name, enrolment period  | Intervention                                                                                                                                                                                                                              | # pts                        | Inclusion criteria | Staging                                                       | Other characteristics*                                                                                      | Other                                                         | Results                                                                                                                                                                                                                                                                                                                                                                                                                                                                                                                                                                                                                                                                                                                                                                                                                                                                                                                                                                                       |
|---------------------------------------------------------------|-------------------------------|-------------------------------------------------------------------------------------------------------------------------------------------------------------------------------------------------------------------------------------------|------------------------------|--------------------|---------------------------------------------------------------|-------------------------------------------------------------------------------------------------------------|---------------------------------------------------------------|-----------------------------------------------------------------------------------------------------------------------------------------------------------------------------------------------------------------------------------------------------------------------------------------------------------------------------------------------------------------------------------------------------------------------------------------------------------------------------------------------------------------------------------------------------------------------------------------------------------------------------------------------------------------------------------------------------------------------------------------------------------------------------------------------------------------------------------------------------------------------------------------------------------------------------------------------------------------------------------------------|
|                                                               |                               |                                                                                                                                                                                                                                           |                              |                    |                                                               |                                                                                                             | Basal-like 20%<br>Luminal B 23%<br>Luminal A 31%<br>Normal 4% | <ul style="list-style-type: none"> <li>•RFS HR=0.80 (95% CI 0.60–1.06)</li> <li>•OS HR=0.90 (95% CI 0.65–1.25)</li> <li>•<b>Luminal B (N=110)</b> <ul style="list-style-type: none"> <li>•RFS HR=0.76 (95% CI 0.47–1.24)</li> <li>•OS HR=0.83 (95% CI 0.46–1.50)</li> </ul> </li> <li>•<b>Luminal A (N=145)</b> <ul style="list-style-type: none"> <li>•RFS HR=1.14 (95% CI 0.70–1.88)</li> <li>•OS HR=1.71 (95% CI 0.91–3.22)</li> </ul> </li> <li>•HER2-E and HER2+ status strongly predicted anthracycline sensitivity, HER2+/HER2-E: 62% response to CEF, 22% response to CMF, p=0.0006</li> </ul>                                                                                                                                                                                                                                                                                                                                                                                        |
| Bartlett, 2010 <sup>32</sup><br><br>Poole, 2006 <sup>33</sup> | NEAT, BR9601<br><br>1996–2001 | E→ CMF vs classic CMF (NEAT)<br>E→ modified CMF vs modified CMF (BR9601)<br><br>Prospectively planned analysis of 1941 tumours by tissue microarrays for HER2, TOP2A, HER1–3, Ki-67, Ch17CEP (chromosome 17 centromere enumeration probe) | 2391 (2021 NEAT, 370 BR9601) |                    | 28% N0<br>47% N1<br>25% N2–3<br><br>43% T1<br>50% T2<br>5% T3 | 48% premenopausal<br>9% perimenopausal<br>37% postmenopausal<br>6% unknown<br>50% ER+, 32% ER-, 18% unknown | Analyzed 1762 pts                                             | Survival rate data reported in earlier publication <sup>33</sup> , RFS and OS significantly higher with E-CMF: <ul style="list-style-type: none"> <li>•2-y RFS 91% vs 85%, 5-y RFS 76% vs 69%</li> <li>•2-y OS 95% vs 92%, 5-y OS 82% vs 75%, p&lt;0.001 for all</li> <li>•RFS HR=0.69 (95% CI 0.58–0.82), p&lt;0.001</li> <li>•OS HR=0.67 (95% CI 0.55–0.82), p&lt;0.0001 favouring E-CMF</li> <li>•Independent prognostic factors were nodal status, tumour grade and size, ER status, vascular/lymphatic invasion; these did not significantly interact with effect of E-CMF</li> <li>•Adverse effects significantly higher with E-CMF but did not significantly affect QoL</li> </ul> <u>2010 publication</u> <ul style="list-style-type: none"> <li>•21% were HER2 amplified, 10% TOP2A amplified, 11% TOP2A deleted, 23% Ch17CEP duplication, 61% high Ki-67 (&gt;13%);</li> <li>•E-CMF significantly better for RFS (p=0.001–0.009) and OS for all categories (p=0.01–0.04)</li> </ul> |

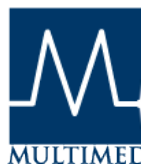

MULTIMED

| Author, year                                          | Trial name, enrolment period | Intervention                                               | # pts | Inclusion criteria        | Staging                                                  | Other characteristics*                                                                        | Other                                                                                                                                                                                                | Results                                                                                                                                                                                                                                                                                                                                                                                                                                                                                                                                                 |
|-------------------------------------------------------|------------------------------|------------------------------------------------------------|-------|---------------------------|----------------------------------------------------------|-----------------------------------------------------------------------------------------------|------------------------------------------------------------------------------------------------------------------------------------------------------------------------------------------------------|---------------------------------------------------------------------------------------------------------------------------------------------------------------------------------------------------------------------------------------------------------------------------------------------------------------------------------------------------------------------------------------------------------------------------------------------------------------------------------------------------------------------------------------------------------|
|                                                       |                              |                                                            |       |                           |                                                          |                                                                                               |                                                                                                                                                                                                      | <ul style="list-style-type: none"> <li>• HER2 amplification and TOP2A deletion were significant prognostic factors for RFS and OS</li> <li>• No significant interaction with anthracycline benefit for Ki-67, HER2, HER1-3, TOP2A</li> <li>• Ch17CEP duplication associated with significant improvement with anthracycline use</li> <li>• RFS: HR=0.92, (95% CI 0.72-1.18) normal vs HR=0.52 (95% CI 0.34-0.81) duplication, interaction p=0.04</li> <li>• OS: HR=0.94 (95% CI 0.72-1.24) vs HR=0.57 (95% CI 0.36-0.92), interaction p=0.02</li> </ul> |
| Earl, 2012 <sup>34</sup>                              | NEAT, BR9601                 | See previous entry in table                                | 2391  |                           |                                                          |                                                                                               |                                                                                                                                                                                                      | <ul style="list-style-type: none"> <li>• Median follow-up 7.4 y, E-CMF vs CMF, 5-y results</li> <li>• RFS: 78% vs 71%, HR=0.75 (95% CI 0.65-0.86), p&lt;0.0001</li> <li>• OS: 84% vs 78%, HR=0.76 (95% CI 0.65-0.89), p=0.0007</li> </ul>                                                                                                                                                                                                                                                                                                               |
| Earl, 2008 <sup>35</sup><br>Poole, 2006 <sup>33</sup> | NEAT<br>1996-2001            | E → CMF vs classic CMF<br><br>QoL and adverse effects data | 2021  | Early stage               | 31% NO<br>45% N1<br>24% N2+<br>44% T1<br>49% T2<br>5% T3 | 48% premenopausal<br>9% perimenopausal<br>37% postmenopausal<br>49% ER+, 32% ER-, 19% unknown | QoL substudy offered to all pts until 500 accrued, used EORTC QLQ-C30 and QLQ-BR23, and Women's Health Questionnaire at baseline, mid-chemotherapy, end of chemotherapy, 12 and 24 mo after baseline | <ul style="list-style-type: none"> <li>• E-CMF vs CMF: 28% improvement in RFS and 30% OS</li> <li>• E-CMF produced low common adverse effects criteria (CTC) scores, although higher than CMF for nausea, vomiting, alopecia, constipation, stomatitis, infection (all p&lt;0.001) and fatigue (p=0.03)</li> <li>• QoL over 2 y was equivalent despite minimally worse adverse effects for E-CMF during treatment</li> <li>• Conclude E-CMF is significantly more effective with no serious long-term adverse effects or QoL detriment</li> </ul>       |
| Van Nes,                                              | POCOB, EORTC                 | FEC preoperative vs FEC postoperative                      | 698   | Early stage, T1c-T3, T4b; | 59% pN+<br>51% cN+                                       | 42% ER+<br>20% ER-                                                                            | Pts ≥50 y assumed                                                                                                                                                                                    | Median follow-up of 10 y: no statistically significant difference between the two                                                                                                                                                                                                                                                                                                                                                                                                                                                                       |

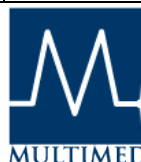

| Author, year                                                                                   | Trial name, enrolment period       | Intervention                                                                                    | # pts                        | Inclusion criteria                                 | Staging                                                                  | Other characteristics*                                                 | Other                                                                                    | Results                                                                                                                                                                                                                                                                                                                                                                                                                                                                                                                                                                                                                                                                                                                                                                                                                                                                                                                                                                                                                                                                                                                |
|------------------------------------------------------------------------------------------------|------------------------------------|-------------------------------------------------------------------------------------------------|------------------------------|----------------------------------------------------|--------------------------------------------------------------------------|------------------------------------------------------------------------|------------------------------------------------------------------------------------------|------------------------------------------------------------------------------------------------------------------------------------------------------------------------------------------------------------------------------------------------------------------------------------------------------------------------------------------------------------------------------------------------------------------------------------------------------------------------------------------------------------------------------------------------------------------------------------------------------------------------------------------------------------------------------------------------------------------------------------------------------------------------------------------------------------------------------------------------------------------------------------------------------------------------------------------------------------------------------------------------------------------------------------------------------------------------------------------------------------------------|
| 2009 <sup>36</sup>                                                                             | 10902<br><br>1991–1999             |                                                                                                 |                              | N0–1                                               | 14% cT1<br>58% cT2<br>27% cT3–4<br><br>37% pT0–1<br>42% pT2<br>11% pT3–4 | 37% unknown<br><br>7% aged ≤35 y<br>48% aged 35–50 y<br>45% aged >50 y | postmenopausal and received tamoxifen for 2 y;<br>BCS +RT or modified radical mastectomy | treatment arms<br><ul style="list-style-type: none"> <li>•OS: 66% postoperative, 64% preoperative, HR=1.09 (95% CI 0.83–1.42), p=0.54</li> <li>•DFS: HR=1.12 (95% CI 0.90–1.39) p=0.30</li> <li>•LRR: HR=1.16 (95% CI 0.77–1.74)</li> <li>•Preoperative chemotherapy was associated with an increase in BCT rates. BCT feasible due to tumour downsizing after preoperative chemotherapy was not correlated with higher LRR or worse OS compared with BCT which was feasible without downsizing of the tumour.</li> </ul>                                                                                                                                                                                                                                                                                                                                                                                                                                                                                                                                                                                              |
| Canney 2012,<br>2014 <sup>10-12</sup> ;<br><br>Velikova 2014 <sup>13</sup><br>[abstracts only] | TACT2,<br>CRUK/05/019<br>2005–2008 | Accelerated epirubicin (aE) + pegfilgrastim vs E; then X vs classic CMF<br><br>E-CMF is control | 4371 female pts, 20 male pts | N+ or high risk<br>N0 invasive early breast cancer |                                                                          |                                                                        | 1 y trastuzumab if HER2+;<br>5 y endocrine therapy if HR+                                | <ul style="list-style-type: none"> <li>•Median follow-up 61 mo, X vs CMF: <ul style="list-style-type: none"> <li>•TTR events: 14.0% vs 14.4%, HR=0.98 (95% CI 0.84–1.15), p=0.79</li> <li>•OS: HR=1.00 (95% CI 0.84–1.20)</li> <li>•DFS: HR=0.99 (95% CI 0.86–1.15)</li> <li>•Fewer serious adverse effects (except diarrhea and PPE) and better global QoL with X than CMF</li> <li>•Concluded X non-inferior efficacy but superior tolerability</li> </ul> </li> <li>•Median follow-up of 49 mo, aE vs E <ul style="list-style-type: none"> <li>•TTR: 3–y recurrence rates 91.0% vs 90.9%, 5–y recurrence rates 86.4% vs 85.2%; HR=0.96</li> <li>•OS 94.4% vs 95.4% at 5 y (p=0.23)</li> </ul> </li> <li>•After 4 cycles, more nausea, vomiting, appetite loss, constipation, systemic adverse effects and deterioration of functioning (global QoL, role function) with aE than E but these did not persist to 12 or 24 mo.</li> <li>•At end of 8 cycles, CMF had more adverse effects than X (fatigue, dyspnea, insomnia, constipation, systemic side-effects, deterioration of functioning ) and these</li> </ul> |

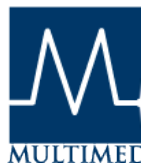

MULTIMED

| Author, year                                     | Trial name, enrolment period | Intervention                                                                                                                                                                                                                                                        | # pts | Inclusion criteria                                                                                    | Staging                                                                          | Other characteristics*                                                                                   | Other                                                                                                           | Results                                                                                                                                                                                                                                                                                                                                                                                                                                                                                         |
|--------------------------------------------------|------------------------------|---------------------------------------------------------------------------------------------------------------------------------------------------------------------------------------------------------------------------------------------------------------------|-------|-------------------------------------------------------------------------------------------------------|----------------------------------------------------------------------------------|----------------------------------------------------------------------------------------------------------|-----------------------------------------------------------------------------------------------------------------|-------------------------------------------------------------------------------------------------------------------------------------------------------------------------------------------------------------------------------------------------------------------------------------------------------------------------------------------------------------------------------------------------------------------------------------------------------------------------------------------------|
|                                                  |                              |                                                                                                                                                                                                                                                                     |       |                                                                                                       |                                                                                  |                                                                                                          |                                                                                                                 | (e.g., fatigue) often persisted to 24mo<br><ul style="list-style-type: none"> <li>Impact on menstruation assessed at 18 mo for premenopausal aged &lt;50 y (N=1622): E→ X had lower risk of permanent loss of menstrual function than E→ CMF (28% vs 69%); aE vs E had more-short term amenorrhea but effect lost by 18 m</li> </ul>                                                                                                                                                            |
| Budd, 2011, 2013 <sup>37,38</sup><br>[abstracts] | SWOG S0221<br>2003–2012      | AC vs ddAC, then second randomization to P(80 mg/m <sup>2</sup> )q1wx12 vs P(175mg/m <sup>2</sup> )q2wx6<br><b>AC</b> =A(24 mg/m <sup>2</sup> )q1wx15 + C(60mg/m <sup>2</sup> )q1d + filgrastim<br><b>ddAC</b> =AC(60/600 mg/m <sup>2</sup> ) q2wx6 + pegfilgrastim | 2716  | N+ or high risk<br>N0; operable                                                                       |                                                                                  |                                                                                                          |                                                                                                                 | At first interim analysis after 2716 pts, a Cox model adjusted for paclitaxel arms had a HR=1.21 (95% CI 0.98–1.50, p=0.071) favouring ddAC; therefore, AC was stopped for futility. All subsequent pts received ddAC and then randomized to weekly or biweekly P                                                                                                                                                                                                                               |
| Lee, <sup>39</sup><br>2008                       | 2002–2005                    | Neoadjuvant TX→ surgery→ AC vs Neoadjuvant AC→ surgery→ TX                                                                                                                                                                                                          | 204   | N+, Stage II/III                                                                                      | Stage II/III<br><br>77% T1–2,<br>23% T3–4<br><br>69% N1,<br>31% N2–3             | 61% HR+<br><br>34% HER2+<br>47% HER2–<br>18% unknown                                                     | All received RT; tamoxifen or anastrozole if HR+                                                                | At median follow-up of 37 mo, no significant difference in DFS by treatment groups (p=0.932).<br>Compared with AC, TX increased pCR in primary tumours (21% vs 10%, p=0.024) and clinical response (84% vs 65%, p=0.003).<br>Fewer pts developed recurrence who achieved pCR in lymph nodes HR=0.189 (95% CI 0.044–0.815), p=0.025 in the multivariate analysis.<br>TX was associated with less nausea and vomiting, but more stomatitis, diarrhea, myalgia, and skin/nail changes than with AC |
| Burnell, <sup>40</sup><br>2010                   | MA.21<br>2000–2005           | CEF vs dd EC→ P vs AC→ P<br><br>Filgrastim and epoetin permitted with CEF or AC→ P, required with EC→ P;<br>Prespecified interim analysis for RFS after 261 events at median follow-up of 30.4 m                                                                    | 2104  | N+ or high risk<br>N0 (≥1cm plus one or more of: ER–, grade 3, or lymphovascular invasion); age ≤60 y | 28% N0,<br>43% N1,<br>22% N2,<br>6% N3<br><br>35% T1<br>55% T2<br>9% T3<br>1% T4 | Premenopausal or early postmenopausal (age <60 y);<br>41% ER+<br>11% HER2+,<br>70% HER2–,<br>19% unknown | Stratified by number of positive nodes, type of surgery, ER status; BCS +RT or mastectomy (PMRT permitted); ER+ | 3–y adjusted RFS for CEF, EC→ P, AC→ P were 90.1%, 89.5%, 85% (p=0.001); pairwise comparison:<br>AC→ P vs CEF: HR=1.49 (95% CI 1.12–1.99), p=0.005<br>AC→ P vs EC→ P: HR=1.68 (95% CI 1.25–2.27), p=0.0006<br>EC→ P vs CEF: HR=0.89 (95% CI 0.64–1.22), p=0.46                                                                                                                                                                                                                                  |





| Author, year                                                          | Trial name, enrolment period   | Intervention                                                                                                                                                                                                                                                                                                           | # pts | Inclusion criteria                                                                 | Staging               | Other characteristics*                                                         | Other                                                                                                    | Results                                                                                                                                                                                                                                                                                                                                                                                                                                                                                                                                                                          |
|-----------------------------------------------------------------------|--------------------------------|------------------------------------------------------------------------------------------------------------------------------------------------------------------------------------------------------------------------------------------------------------------------------------------------------------------------|-------|------------------------------------------------------------------------------------|-----------------------|--------------------------------------------------------------------------------|----------------------------------------------------------------------------------------------------------|----------------------------------------------------------------------------------------------------------------------------------------------------------------------------------------------------------------------------------------------------------------------------------------------------------------------------------------------------------------------------------------------------------------------------------------------------------------------------------------------------------------------------------------------------------------------------------|
|                                                                       |                                |                                                                                                                                                                                                                                                                                                                        |       |                                                                                    |                       |                                                                                | received tamoxifen, AI allowed after Oct 2004; trastuzumab for 1 y for HER2+ was allowed after June 2005 | <u>Adverse effects:</u> CEF, EC→ P compared with AC/P: febrile neutropenia: 22.3% CEF, 16.4% EC/P 4.8% AC/P (p=0.001); erythrocyte transfusion 23.8% CEF, 39.9% EC→ P, 1.6% AC/P (p<0.001); grade 3–4 cardiotoxicity higher in CEF (2.1%) vs 0.7% and 0.3% (p<0.001)<br>AC→ P inferior for RFS but fewer adverse effects                                                                                                                                                                                                                                                         |
| Janni, 2012 <sup>41</sup> ; Schoenher r 2010 <sup>42</sup> [abstract] | ADEBAR (only in abstract form) | Dose-intensive FE <sub>120</sub> C vs E <sub>90</sub> C→ T<br><br>FE <sub>120</sub> C: F 500 mg/m <sup>2</sup> days 1+8 + E 60 mg/m <sup>2</sup> days 1+8 + C 75 mg/m <sup>2</sup> days 1–14, q4wx6<br><br>E <sub>90</sub> C→T: E 90 mg/m <sup>2</sup> + C 600 mg/m <sup>2</sup> q21dx4→ T 100mg/m <sup>2</sup> q21dx4 | 1502  | N2+                                                                                |                       |                                                                                |                                                                                                          | Median 49.5 mo observation<br>Events: HR=0.877 (95% CI 0.722–1.065), p=0.38<br>OS: HR=0.996 (95% CI 0.783–1.267), p=0.969<br>Different adverse effects profiles:<br>FEC had more hematological adverse effects, more infection (20% vs 10%), required more GCSF (61% vs 39%) and erythropoietin stimulation (20% vs 8.7%), p<0.0001<br>Myalgia and arthralgia occurred significantly more often in the EC→ T-arm (12.3 vs 1.4%, p<0.0001). Neurological symptoms and dermal adverse effects were found almost exclusively in the EC→ T arm (3.9% vs 0.3%, 4.2% vs 0.8% p=0.0001) |
| Earl, 2014 <sup>24</sup>                                              | Neo-tAnGo                      | Neoadjuvant:<br>EC→ P vs P→ EC vs EC→ GP vs GP→ EC<br><br>Effect of gemcitabine and role of sequence (EC→ P vs P→ EC)<br>Stratified by ER status, tumour size (50 mm cut-off), nodal status (N0/N+), inflammatory/locally advanced (yes/no)                                                                            | 831   | Early invasive, >2 cm; no previous chemo, RT, endocrine therapy<br><br>T4 eligible | 80% T2, 20% T3 50% N+ | 67% ER+ 51% PR+ 25% inflammatory or LABC; 57% premenopausal, 5% perimenopausal |                                                                                                          | Median follow-up 47 mo; first planned interim analysis found no significant difference in DFS or OS<br>• DFS<br>• EC→ P vs EC→ PG, HR=1.13 (95% CI 0.88–1.46), p=0.34;<br>• P→ EC vs EC→ P HR=0.84 (95% CI 0.65–1.09), p=0.18<br>• OS<br>• EC→ P vs EC→ PG HR=1.02 (95% CI 0.76–1.39), p=0.89;<br>• P→ EC vs EC→ P HR=0.82                                                                                                                                                                                                                                                       |

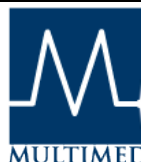

| Author, year                              | Trial name, enrolment period | Intervention                                                                                                     | # pts | Inclusion criteria                                                                                                   | Staging | Other characteristics* | Other                                                                    | Results                                                                                                                                                                                                                                                            |
|-------------------------------------------|------------------------------|------------------------------------------------------------------------------------------------------------------|-------|----------------------------------------------------------------------------------------------------------------------|---------|------------------------|--------------------------------------------------------------------------|--------------------------------------------------------------------------------------------------------------------------------------------------------------------------------------------------------------------------------------------------------------------|
|                                           |                              |                                                                                                                  |       |                                                                                                                      |         |                        |                                                                          | (95% CI 0.60–1.11), p=0.19<br><ul style="list-style-type: none"> <li>• pCR greater with P→ EC than EC→ P (20% vs 15%, p=0.03); G did not increase pCR</li> <li>• pCR was correlated with significant improvement in DFS (p&lt;0.0001) and OS (p=0.0007)</li> </ul> |
| Kerbrat, 2012 <sup>43</sup><br>[abstract] | PACS 05<br>2002–2006         | FEC-100 q3wx6 vs FEC-100q3wx4<br><br>F 500 mg/m <sup>2</sup> , E 100 mg/m <sup>2</sup> , C 500 mg/m <sup>2</sup> | 1515  | High-risk N0. Operable, N0, >1 cm and another poor prognostic factor (T >2 cm, HR–, SBR grade II or III, aged <35 y) |         |                        | HR+ pts received 5 y hormonal therapy; after Aug 2005 excluded HER2+ pts | Median follow-up 73 mo<br>PFS: 12.0% vs 14.0%<br>No difference in DFS, DDFS, local relapse, OS<br>More grade III and IV neutropenia after 6 cycles                                                                                                                 |

**Abbreviations:** AC, doxorubicin (Adriamycin) + cyclophosphamide; aE, accelerated epirubicin; AI, aromatase inhibitor; ALND, axillary lymph node dissection; BCS, breast-conserving surgery; BCT, breast-conserving therapy (BCS + RT); CEF, cyclophosphamide + epirubicin + fluorouracil; CEX, cyclophosphamide + epirubicin + capecitabine; CMF, cyclophosphamide + methotrexate + fluorouracil; dd, dose-dense; ddAC, dose-dense AC; DFS, disease-free survival rate; DDFS, distant disease-free survival rate; E, epirubicin; EC, epirubicin + cyclophosphamide; EFS, event-free survival rate; ER, estrogen receptor; FEC, fluorouracil + epirubicin + cyclophosphamide; G, gemcitabine; GCSF, granulocyte-colony stimulating factor; GnRH, gonadotropin-releasing hormone; HEC, high-dose EC; HER2, human epidermal growth factor receptor 2; HER2-E, HER-2 enriched; HR, hazard ratio; HR+, hormone receptor positive; HR–, hormone receptor negative; IDFS, invasive disease-free survival rate; LABC, locally advanced breast cancer; LRR, locoregional recurrence; N0, node-negative; N+, node-positive; OS, overall survival rate; P, paclitaxel; PG, paclitaxel + gemcitabine; pCR, pathologically complete response; PMRT, postmastectomy radiotherapy; pts, patients; PR, progesterone receptor; QoL, quality of life; RFS, recurrence-free survival rate; RT, radiation therapy (radiotherapy); T, docetaxel (Taxotere); TLI, thymidine labeling index; TX, docetaxel + capecitabine; X, capecitabine.

\*HER2, ER/PR, lymph node, risk, menopausal status



Intrinsic Subtypes: luminal A=(ER+ and/or PR+) and not (HER2+ or Ki-67<sup>high</sup>); luminal B=(ER+ and/or PR+) and either (HER2+ and/or Ki-67<sup>high</sup>); HER2=HER2+ and ER-; triple negative (TN)=PR- and ER- and HER2-; basal=TN and either (EGFR+ or cytokeratins 5/6+)

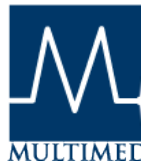

**Supplemental Table 3. Taxanes: Paclitaxel and docetaxel.**

| Author, year                                                             | Trial name, enrolment period | Intervention                                                                                                                                                                                                                                                                                                                                                                                                                                                                                                                                                                                                                          | # pts | Inclusion criteria | Staging                                                             | Other characteristics*                                                | Other                                                                             | Results                                                                                                                                                                                                                                                                                                                                                                |
|--------------------------------------------------------------------------|------------------------------|---------------------------------------------------------------------------------------------------------------------------------------------------------------------------------------------------------------------------------------------------------------------------------------------------------------------------------------------------------------------------------------------------------------------------------------------------------------------------------------------------------------------------------------------------------------------------------------------------------------------------------------|-------|--------------------|---------------------------------------------------------------------|-----------------------------------------------------------------------|-----------------------------------------------------------------------------------|------------------------------------------------------------------------------------------------------------------------------------------------------------------------------------------------------------------------------------------------------------------------------------------------------------------------------------------------------------------------|
| <b>Taxane + anthracycline (sequential) vs same anthracycline regimen</b> |                              |                                                                                                                                                                                                                                                                                                                                                                                                                                                                                                                                                                                                                                       |       |                    |                                                                     |                                                                       |                                                                                   |                                                                                                                                                                                                                                                                                                                                                                        |
| Rastogi, 2008 <sup>44</sup>                                              | NSABP B-27<br>1995–2000      | See neoadjuvant section later in this table                                                                                                                                                                                                                                                                                                                                                                                                                                                                                                                                                                                           |       |                    |                                                                     |                                                                       |                                                                                   |                                                                                                                                                                                                                                                                                                                                                                        |
| Mamounas, 2005 <sup>45</sup>                                             | NSABP B-28<br>1995–1998      | AC vs AC→ P<br><br>AC: A (60 mg/m <sup>2</sup> ) + C (600 mg/m <sup>2</sup> ) q3wx4<br><br>AC→ P: A (60 mg/m <sup>2</sup> ) + C (600 mg/m <sup>2</sup> ) q3wx4→ P (225 mg/m <sup>2</sup> ) q3wx4<br><br>• Before each P cycle, dexamethasone (20mg), diphenhydramine (50mg), and cimetidine (300mg) or ranitidine (50 mg)<br>• All ER+ or PR+ pts or pts aged ≥50 y at time of surgery: tamoxifen (20mg/d) for 5 y beginning first day of AC cycle<br>• Primary prophylaxis with GCSF not allowed, secondary prophylaxis mandated following a cycle complicated by prolonged neutropenia, febrile neutropenia, or grade 3–4 infection | 3060  | N+, cT1–3, cN0–1   | 70% N1<br>26% N2<br>4% N3<br><br>59% T1<br>32% 2.1–4 cm<br>8% ≥4 cm | 66% ER+<br>34% ER–/<br>borderline<br>61% PR+<br>39%<br>PR–/borderline | Tamoxifen for 5 y administered if age ≥50 y or HR+; RT after BCS, PMRT prohibited | 5–y survival rates<br>DFS: 76% AC→ P vs 72% AC, RR=0.83 (95% CI 0.72–0.95), p=0.006<br>OS: 85% for both groups, RR=0.93 (95% CI 0.78–1.12), p=0.46<br>Subgroup analysis on the effect of paclitaxel according to hormone receptor status and tamoxifen administration did not find statistically significant interaction<br>Adverse effects with AC→ P were acceptable |
| Pusztai, 2009 <sup>46</sup>                                              | NSABP B-28                   | See previous entry in table <sup>45</sup><br>Tau protein expression                                                                                                                                                                                                                                                                                                                                                                                                                                                                                                                                                                   | 1924  |                    |                                                                     |                                                                       |                                                                                   | No significant interaction between Tau expression and benefit from paclitaxel in total population or pts with ER+ or ER– cancer                                                                                                                                                                                                                                        |

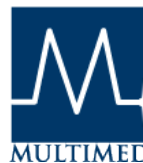

| Author, year                  | Trial name, enrolment period        | Intervention                                                                                                                                                                                                                                                                                                                                                                                                                                                                                                                          | # pts | Inclusion criteria                             | Staging                                                      | Other characteristics*                    | Other                                                                                                                                   | Results                                                                                                                                                                                                                                                                                                                                                                                                                                                                                                                                                                                                       |
|-------------------------------|-------------------------------------|---------------------------------------------------------------------------------------------------------------------------------------------------------------------------------------------------------------------------------------------------------------------------------------------------------------------------------------------------------------------------------------------------------------------------------------------------------------------------------------------------------------------------------------|-------|------------------------------------------------|--------------------------------------------------------------|-------------------------------------------|-----------------------------------------------------------------------------------------------------------------------------------------|---------------------------------------------------------------------------------------------------------------------------------------------------------------------------------------------------------------------------------------------------------------------------------------------------------------------------------------------------------------------------------------------------------------------------------------------------------------------------------------------------------------------------------------------------------------------------------------------------------------|
| Vici, 2012 <sup>47</sup>      | GOIM 9902<br>1999–2005              | EC vs T→ EC<br>High-dose EC (E 120 mg/m <sup>2</sup> , C 600 mg/m <sup>2</sup> ) in both arms<br><br>EC: E (120 mg/m <sup>2</sup> ) + C (600 mg/m <sup>2</sup> ) q3wx4<br><br>T→ EC: T (100 mg/m <sup>2</sup> ) q3wx4→ E (120 mg/m <sup>2</sup> ) + C (600 mg/m <sup>2</sup> ) q3wx4<br><br>Primary prophylaxis with GCSF not allowed; administered in subsequent cycles if treatment delay due to low granulocyte/platelet count or G4 febrile neutropenia                                                                           | 750   | pN+ (at least 5 nodes removed), operable, T1–3 | 94% N1<br>4% N2<br>1% N3<br><br>41% T1<br>53% T2<br>6% T3    | 46% premenopausal<br>77% HR+<br>28% HER2+ | Tamoxifen for 5 y if HR+, starting Jan 2003 post-menopausal pts administered anastrozole for 5 y; RT for BCS, PMRT if 4+ positive nodes | Median follow-up 64 mo: report 5–y survival rates, T→ EC vs EC<br>DFS: 73.4% in both arms, HR=0.99 (95% CI 0.75–1.31), p=0.95<br>DFS: no treatment differences between subgroups (T1 vs T2–3, ER and hormone receptor status)<br>OS: 90.7% T→ EC vs 89.5% EC, HR=0.84 (95% CI 0.54–1.31), p=0.45<br>Adverse effects more common but manageable with T→ EC: G3–4 neutropenia (65% vs 54%, p=0.007); hypersensitivity (5.2% vs 0.3%, p<0.0001), reversible cardiotoxicity (1.4% vs 0.3%, p=0.23), skin (1.6% vs 0%, p=0.03), diarrhea (3.3% vs 0.3%, p=0.006)<br>Found no advantage of adding T to high-dose EC |
| Henderson, 2003 <sup>48</sup> | CALGB 9344<br>INT 0148<br>1994–1999 | AC (A: 60, 75, or 90 mg/m <sup>2</sup> ) vs AC (A: 60, 75, or 90 mg/m <sup>2</sup> )→ P<br><br>AC: C (600 mg/m <sup>2</sup> ) + A (either: 60 mg/m <sup>2</sup> on day 1 or 75 or 90 mg/m <sup>2</sup> on days 1 or 2) q3wx4<br><br>AC→ P: C (600 mg/m <sup>2</sup> ) + A (either: 60 mg/m <sup>2</sup> on day 1 or 75 or 90 mg/m <sup>2</sup> on days 1 or 2) q3wx4→ P (175 mg/m <sup>2</sup> ) q3wx4<br><br>Filgrastim (5µg/kg/d) + ciprofloxacin (750 mg 2xdaily) administered routinely to pts receiving A 90 mg/m <sup>2</sup> ; | 3121  | Operable, N+                                   | 46% N1<br>42% N2<br>12% N3<br><br>35% T1<br>52% T2<br>13% T3 | 62% premenopausal<br>66% HR+<br>59% ER+   | Tamoxifen administered for 5 y to 94% of pts with HR+ cancer and 21% of pts with HR– cancer; RT for BCS, PMRT elective                  | Median follow-up 69 mo, 5–y survival rates, AC→ P vs AC<br>DFS: 69%, 66%, 67% for increasing doses of A (no dose effect)<br>DFS: 70% AC→ P vs 65% AC, p=0.0023<br>OS: 80% AC→ P vs 77% AC, HR=0.82 (95% CI 0.71–0.95), p=0.0064<br>Unplanned subset analysis:<br>ER–: HR=0.72 (95% CI 0.59–0.86)<br>ER+: HR=0.91 (95% CI 0.78–1.07)<br>Without tamoxifen: HR=0.69 (95% CI 0.57–0.84)<br>With tamoxifen: HR=0.92 (95% CI 0.79–1.08)                                                                                                                                                                            |

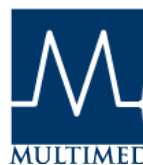

| Author, year                             | Trial name, enrolment period | Intervention                                                                                                                                                                                                                                                            | # pts   | Inclusion criteria | Staging | Other characteristics* | Other | Results                                                                                                                                                                                                                                                                                                                                                                                                                                                                                                                                                                                                                                                                                                                                                                   |       |     |   |         |                                         |  |  |  |       |     |   |         |                                         |  |  |  |       |     |   |         |                                          |  |  |  |       |     |   |         |                           |  |  |  |
|------------------------------------------|------------------------------|-------------------------------------------------------------------------------------------------------------------------------------------------------------------------------------------------------------------------------------------------------------------------|---------|--------------------|---------|------------------------|-------|---------------------------------------------------------------------------------------------------------------------------------------------------------------------------------------------------------------------------------------------------------------------------------------------------------------------------------------------------------------------------------------------------------------------------------------------------------------------------------------------------------------------------------------------------------------------------------------------------------------------------------------------------------------------------------------------------------------------------------------------------------------------------|-------|-----|---|---------|-----------------------------------------|--|--|--|-------|-----|---|---------|-----------------------------------------|--|--|--|-------|-----|---|---------|------------------------------------------|--|--|--|-------|-----|---|---------|---------------------------|--|--|--|
|                                          |                              | only after an episode of febrile neutropenia for other pts                                                                                                                                                                                                              |         |                    |         |                        |       | <p>Additional adverse effects from adding P were generally modest</p> <p>P resulted in fewer hematological adverse effects (16% vs 62% granulocytopenia for lowest dose AC), less other adverse effects (nausea, vomiting, stomatitis, cardiotoxicity)</p> <p>Higher doxorubicin doses vs lower doses resulted in significantly more dose reductions and delays (<math>p &lt; 0.001</math>) and cardiotoxicity (<math>p = 0.0032</math>)</p>                                                                                                                                                                                                                                                                                                                              |       |     |   |         |                                         |  |  |  |       |     |   |         |                                         |  |  |  |       |     |   |         |                                          |  |  |  |       |     |   |         |                           |  |  |  |
| Sartor, 2005 <sup>49</sup>               | CLGB 9344                    | See previous entry in table <sup>48</sup><br>Subgroups were records indicate patient received BCS +RT                                                                                                                                                                   | 169     |                    |         |                        |       | 5-y cumulative incidence of isolated LRR after BCS + RT: 3.7% AC→P vs 9.7% AC, $p = 0.04$                                                                                                                                                                                                                                                                                                                                                                                                                                                                                                                                                                                                                                                                                 |       |     |   |         |                                         |  |  |  |       |     |   |         |                                         |  |  |  |       |     |   |         |                                          |  |  |  |       |     |   |         |                           |  |  |  |
| Hayes, 2007 <sup>50</sup>                | CLGB 9344                    | See previous entry in table <sup>48</sup><br>Randomly selected tissue blocks from subset of 1500 female pts from study; analyzed 1322 by IHC for HER2                                                                                                                   | 1322    |                    |         |                        |       | <p>No interaction observed between HER2+ and doxorubicin doses</p> <p>HER2+ associated with significant benefit from paclitaxel, interaction HR=0.59, <math>p = 0.01</math>, regardless of ER status</p> <p>Paclitaxel did not benefit HER2- ER+ cancers</p>                                                                                                                                                                                                                                                                                                                                                                                                                                                                                                              |       |     |   |         |                                         |  |  |  |       |     |   |         |                                         |  |  |  |       |     |   |         |                                          |  |  |  |       |     |   |         |                           |  |  |  |
| Berry, 2009 <sup>51</sup><br>[abstract]  | CLGB 9344                    | See previous entry in table <sup>48</sup><br>HER2 and ER status from tissue microarrays from 2039 pathology blocks from the study, including 957 that were part of previous HER2 study <sup>50</sup> ; plus results of the previous study where samples not re-analyzed | 2376    |                    |         |                        |       | <p>HER2 had significant interaction with P for RFS, <math>p = 0.001</math></p> <p>RFS for P vs not P:</p> <table> <tr> <td>HER2-</td> <td>ER-</td> <td>:</td> <td>HR=0.89</td> </tr> <tr> <td colspan="4">(95% CI 0.79-0.99), <math>p = 0.027</math>, N=681</td> </tr> <tr> <td>HER2-</td> <td>ER+</td> <td>:</td> <td>HR=1.01</td> </tr> <tr> <td colspan="4">(95% CI 0.92-1.10), <math>p = 0.95</math>, N=1342</td> </tr> <tr> <td>HER2+</td> <td>ER-</td> <td>:</td> <td>HR=0.73</td> </tr> <tr> <td colspan="4">(95% CI 0.59-0.89), <math>p = 0.0018</math>, N=192</td> </tr> <tr> <td>HER2+</td> <td>ER+</td> <td>:</td> <td>HR=0.77</td> </tr> <tr> <td colspan="4">(95% CI 0.65-0.92), N=277</td> </tr> </table> <p>Results were similar for OS (not reported)</p> | HER2- | ER- | : | HR=0.89 | (95% CI 0.79-0.99), $p = 0.027$ , N=681 |  |  |  | HER2- | ER+ | : | HR=1.01 | (95% CI 0.92-1.10), $p = 0.95$ , N=1342 |  |  |  | HER2+ | ER- | : | HR=0.73 | (95% CI 0.59-0.89), $p = 0.0018$ , N=192 |  |  |  | HER2+ | ER+ | : | HR=0.77 | (95% CI 0.65-0.92), N=277 |  |  |  |
| HER2-                                    | ER-                          | :                                                                                                                                                                                                                                                                       | HR=0.89 |                    |         |                        |       |                                                                                                                                                                                                                                                                                                                                                                                                                                                                                                                                                                                                                                                                                                                                                                           |       |     |   |         |                                         |  |  |  |       |     |   |         |                                         |  |  |  |       |     |   |         |                                          |  |  |  |       |     |   |         |                           |  |  |  |
| (95% CI 0.79-0.99), $p = 0.027$ , N=681  |                              |                                                                                                                                                                                                                                                                         |         |                    |         |                        |       |                                                                                                                                                                                                                                                                                                                                                                                                                                                                                                                                                                                                                                                                                                                                                                           |       |     |   |         |                                         |  |  |  |       |     |   |         |                                         |  |  |  |       |     |   |         |                                          |  |  |  |       |     |   |         |                           |  |  |  |
| HER2-                                    | ER+                          | :                                                                                                                                                                                                                                                                       | HR=1.01 |                    |         |                        |       |                                                                                                                                                                                                                                                                                                                                                                                                                                                                                                                                                                                                                                                                                                                                                                           |       |     |   |         |                                         |  |  |  |       |     |   |         |                                         |  |  |  |       |     |   |         |                                          |  |  |  |       |     |   |         |                           |  |  |  |
| (95% CI 0.92-1.10), $p = 0.95$ , N=1342  |                              |                                                                                                                                                                                                                                                                         |         |                    |         |                        |       |                                                                                                                                                                                                                                                                                                                                                                                                                                                                                                                                                                                                                                                                                                                                                                           |       |     |   |         |                                         |  |  |  |       |     |   |         |                                         |  |  |  |       |     |   |         |                                          |  |  |  |       |     |   |         |                           |  |  |  |
| HER2+                                    | ER-                          | :                                                                                                                                                                                                                                                                       | HR=0.73 |                    |         |                        |       |                                                                                                                                                                                                                                                                                                                                                                                                                                                                                                                                                                                                                                                                                                                                                                           |       |     |   |         |                                         |  |  |  |       |     |   |         |                                         |  |  |  |       |     |   |         |                                          |  |  |  |       |     |   |         |                           |  |  |  |
| (95% CI 0.59-0.89), $p = 0.0018$ , N=192 |                              |                                                                                                                                                                                                                                                                         |         |                    |         |                        |       |                                                                                                                                                                                                                                                                                                                                                                                                                                                                                                                                                                                                                                                                                                                                                                           |       |     |   |         |                                         |  |  |  |       |     |   |         |                                         |  |  |  |       |     |   |         |                                          |  |  |  |       |     |   |         |                           |  |  |  |
| HER2+                                    | ER+                          | :                                                                                                                                                                                                                                                                       | HR=0.77 |                    |         |                        |       |                                                                                                                                                                                                                                                                                                                                                                                                                                                                                                                                                                                                                                                                                                                                                                           |       |     |   |         |                                         |  |  |  |       |     |   |         |                                         |  |  |  |       |     |   |         |                                          |  |  |  |       |     |   |         |                           |  |  |  |
| (95% CI 0.65-0.92), N=277                |                              |                                                                                                                                                                                                                                                                         |         |                    |         |                        |       |                                                                                                                                                                                                                                                                                                                                                                                                                                                                                                                                                                                                                                                                                                                                                                           |       |     |   |         |                                         |  |  |  |       |     |   |         |                                         |  |  |  |       |     |   |         |                                          |  |  |  |       |     |   |         |                           |  |  |  |



| Author, year                                                                          | Trial name, enrolment period | Intervention                                                                                                                                                                                                                                                                                                                             | # pts | Inclusion criteria                    | Staging                                       | Other characteristics*                                                   | Other                                                                                                                        | Results                                                                                                                                                                                                                                                                                                                                           |
|---------------------------------------------------------------------------------------|------------------------------|------------------------------------------------------------------------------------------------------------------------------------------------------------------------------------------------------------------------------------------------------------------------------------------------------------------------------------------|-------|---------------------------------------|-----------------------------------------------|--------------------------------------------------------------------------|------------------------------------------------------------------------------------------------------------------------------|---------------------------------------------------------------------------------------------------------------------------------------------------------------------------------------------------------------------------------------------------------------------------------------------------------------------------------------------------|
|                                                                                       |                              |                                                                                                                                                                                                                                                                                                                                          |       |                                       |                                               |                                                                          |                                                                                                                              | AC→ P in pts with N+ cancer improves outcome for HER2+ tumours and TN or double-negative tumours, but does not benefit ER+HER2- (which are majority of pts)                                                                                                                                                                                       |
| Lara, 2011 <sup>52</sup>                                                              | CLGB 9344                    | See previous entry in table <sup>48</sup><br>From trial, evaluated 1887 patient specimens for p53 expression using IHC antibodies (mAbs 1801 and D07)                                                                                                                                                                                    | 1877  |                                       |                                               | P53 expression:<br>23% by mAbs 1801 and 27% by mAbs D07, 92% concordance |                                                                                                                              | P53+ associated with worse OS with either antibody<br>P53 staining with mAb 1801 had significantly worse RFS<br>P53 not predictive of RFS or OS from either doxorubicin dose escalation or addition of paclitaxel                                                                                                                                 |
| Cognetti, 2008 <sup>53</sup><br>[abstract]                                            | TAXIT 216<br>1998–2002       | E→ T→ CMF vs E→ CMF<br><br>E→ CMF: E (120 mg/m <sup>2</sup> ) q3wx4→ C (600 mg/m <sup>2</sup> ) + M (40 mg/m <sup>2</sup> ) + F (600 mg/m <sup>2</sup> ) days 1&8, q4wx4<br><br>E→ T→ CMF: E (120 mg/m <sup>2</sup> ) q3wx4→ T (100 mg/m <sup>2</sup> ) q3wx4→ CMF                                                                       | 998   | Early, N+                             |                                               |                                                                          |                                                                                                                              | Median follow-up 62 mo, report 5-y survival rates, E→ T→ CMF vs E→ CM<br>DFS: 74% vs 68%, HR=0.82 (95% CI 0.64–1.03), p=0.13<br>RFS: 76% vs 69%, HR=0.75 (95% CI 0.59–0.96), p=0.039<br>OS: 90% vs 85%, HR=0.67 (95% CI 0.48–0.94), p=0.017                                                                                                       |
| <b>Taxane + anthracycline (sequential) vs more non-taxane (anthracycline) regimen</b> |                              |                                                                                                                                                                                                                                                                                                                                          |       |                                       |                                               |                                                                          |                                                                                                                              |                                                                                                                                                                                                                                                                                                                                                   |
| Francis, 2008 <sup>54</sup>                                                           | BIG 02–98<br>1998–2001       | A→ CMF (sequential control) vs AC→ CMF (concurrent control) vs<br>A→ T→ CMF (sequential docetaxel) vs<br>AT→ CMF (concurrent docetaxel)<br><br>*In all arms, if oral C not tolerated, IV C (600 mg/m <sup>2</sup> ) used<br><br>A→ CMF: A (75 mg/m <sup>2</sup> ) q3wx4→ C (100 mg/m <sup>2</sup> ) + M (40 mg/m <sup>2</sup> ) + F (600 | 2887  | N+ (at least 8 nodes dissected), T1–3 | 54% N1<br>46% N2–3<br><br>92% pT1–2<br>7% pT3 | 54% premenopausal<br>76% HR+, 24% HR–                                    | Tamoxifen administered for 5 y if HR+, from 2004 on allowed sequential AIs in post-menopausal pts and ovarian suppression in | Analysis after 5 y<br>DFS: 73% A, 72% AC, 78% A→ T, 74% AT<br><br>DFS: T vs control: HR=0.86 (95% CI 0.74–1.00), p=0.051<br>DFS: sequential T vs control: HR=0.79 (95% CI 0.64–0.98), p=0.035<br>DFS: concurrent T vs control: HR=0.93 (95% CI 0.75–1.14), p=0.48<br>DFS: sequential T vs concurrent T: HR=0.83 (95% CI 0.69–1.00) [survival rate |



| Author, year              | Trial name, enrolment period | Intervention                                                                                                                                                                                                                                                                                                                                                                                                                                                                                                                                                                                                                                                                                                                                                                                                                                                         | # pts | Inclusion criteria | Staging | Other characteristics* | Other                                                                    | Results                                                                                                                                                                                                                                                                                                                                                            |
|---------------------------|------------------------------|----------------------------------------------------------------------------------------------------------------------------------------------------------------------------------------------------------------------------------------------------------------------------------------------------------------------------------------------------------------------------------------------------------------------------------------------------------------------------------------------------------------------------------------------------------------------------------------------------------------------------------------------------------------------------------------------------------------------------------------------------------------------------------------------------------------------------------------------------------------------|-------|--------------------|---------|------------------------|--------------------------------------------------------------------------|--------------------------------------------------------------------------------------------------------------------------------------------------------------------------------------------------------------------------------------------------------------------------------------------------------------------------------------------------------------------|
|                           |                              | <p>mg/m<sup>2</sup>) days 1&amp;8 q4wx3</p> <p>AC→ CMF: A (60 mg/m<sup>2</sup>) + C (600 mg/m<sup>2</sup>) q3wx4→ C (100 mg/m<sup>2</sup>) + M (40 mg/m<sup>2</sup>) + F (600 mg/m<sup>2</sup>) days 1&amp;8 q4wx3</p> <p>A→ T→ CMF: A (75 mg/m<sup>2</sup>) q3wx3→ T (100 mg/m<sup>2</sup>) q3wx3→ C (100 mg/m<sup>2</sup>) + M (40 mg/m<sup>2</sup>) + F (600 mg/m<sup>2</sup>) days 1&amp;8 q4wx3</p> <p>AT→ CMF: A (50 mg/m<sup>2</sup>) + T (75 mg/m<sup>2</sup>) q3wx4→ C (100 mg/m<sup>2</sup>) + M (40 mg/m<sup>2</sup>) + F (600 mg/m<sup>2</sup>) days 1&amp;8 q4wx3</p> <p>Unbalanced randomization, ratio: 1:1:2:2</p> <p>Ciprofloxacin administered during AT cycles; primary GCSF prophylaxis not permitted, but recommended with subsequent doses in cases of previous febrile neutropenia, grade 3-4 infection, delay &gt;7 d due to neutropenia</p> |       |                    |         |                        | pre-menopausal; RT after BCS, PMRT according to institutional guidelines | <p>better with sequential T]</p> <p>No heterogeneity of effect with regard to efficacy of T found in subgroups according to age, lymph node status or hormone status</p> <p>Too early to report OS</p> <p>Febrile neutropenia, severe asthenia, myalgias, diarrhea, skin adverse effects, and neurosensory adverse effects more common with T than in controls</p> |
| Oakman 2013 <sup>55</sup> | BIG 02-98                    | See previous entry in table <sup>54</sup>                                                                                                                                                                                                                                                                                                                                                                                                                                                                                                                                                                                                                                                                                                                                                                                                                            | 2887  |                    |         |                        |                                                                          | <p>Median follow-up 93.4 mo</p> <ul style="list-style-type: none"> <li>• DFS (T vs no T): HR=0.91 (95% CI 0.80-1.05), p=0.187</li> <li>• DFS (sequential T vs sequential control): HR=0.81 (95% CI 0.67-0.99), p=0.036</li> <li>• DFS (sequential A→ T vs concurrent AT):</li> </ul>                                                                               |





| Author, year                         | Trial name, enrolment period     | Intervention                                                                                                                                                                                                   | # pts | Inclusion criteria                                                                       | Staging                                    | Other characteristics* | Other                                                                                                 | Results                                                                                                                                                                                                                                                                                                                                                                                                                                                                                                      |
|--------------------------------------|----------------------------------|----------------------------------------------------------------------------------------------------------------------------------------------------------------------------------------------------------------|-------|------------------------------------------------------------------------------------------|--------------------------------------------|------------------------|-------------------------------------------------------------------------------------------------------|--------------------------------------------------------------------------------------------------------------------------------------------------------------------------------------------------------------------------------------------------------------------------------------------------------------------------------------------------------------------------------------------------------------------------------------------------------------------------------------------------------------|
|                                      |                                  |                                                                                                                                                                                                                |       |                                                                                          |                                            |                        |                                                                                                       | HR=0.84 (95% CI 0.72–0.99), p=0.035<br><ul style="list-style-type: none"> <li>OS (sequential A→ T vs concurrent AT): HR=0.79 (95% CI 0.65–0.98), p=0.028</li> </ul> Better OS and DFS with A→ T compared with concurrent AT                                                                                                                                                                                                                                                                                  |
| Fernandez-Cuesta, 2012 <sup>56</sup> | BIG 02–98 1998–2001              | See previous entry in table <sup>54</sup><br><br>Retrospective analysis of TP53 mutations for 18% of pts; classified as wild type (no TP53 variations or variations which do not modify p53 protein) or mutant | 520   |                                                                                          |                                            | 17% mutants            |                                                                                                       | P53 status had no significant predictive value for response to docetaxel<br>P53 truncating mutations were uncommon (3.6%) but associated with poor prognosis                                                                                                                                                                                                                                                                                                                                                 |
| Martin, 2013 <sup>57</sup>           | GEICAM/ 2003–02<br><br>2003–2008 | FAC→ P vs FAC<br><br>FAC (500/50/500 mg/m <sup>2</sup> )q3w×4→ P (100 mg/m <sup>2</sup> )q1w×8 vs FAC (500/50/500 mg/m <sup>2</sup> ) q3w×6                                                                    | 1925  | T1–3, N0 and at least one high-risk factor (age <35 y, T2+, HR–, histological grade 2–3) | 58% T1<br>40% T2                           | 50% premenopausal      | HER2+ pts excluded after 2005 (792 pts already recruited);<br>73% HR+,<br>9.4% HER2+                  | Median follow-up 63.3 mo<br><ul style="list-style-type: none"> <li>5–y DFS: 93% vs 90.3%, HR=0.73 (95% CI 0.54–0.99), p=0.04</li> <li>OS: 97% vs 96%, HR=0.79 (95% CI 0.49–1.26), p=0.31</li> <li>1 vs 7 deaths from cardiovascular disease</li> </ul> Grade 3/4 adverse events: neutropenia 22% vs 25% (p=0.07), febrile neutropenia 2.7% vs 3.6% (p=0.22), fatigue 7.9% vs 3.4% (p<0.01), sensory neuropathy 5.5% vs 0% (p<0.01), myalgia 1.5% vs 0.2% (p<0.01), thrombosis/embolism 1.1% vs 0.1% (p<0.01) |
| Delbaldo, 2014 <sup>58</sup>         | AERO-B2000<br><br>2000–2002      | FEC <sub>100</sub> → P vs FEC <sub>100</sub><br><br>FEC (500/100/500 mg/m <sup>2</sup> )q3w×4→ P(175 mg/m <sup>2</sup> )q3w×4 vs FEC(500/100/500 mg/m <sup>2</sup> )q3w×6                                      | 837   | N+                                                                                       | Mean 4.3 positive nodes;<br>43% T1, 46% T2 | 73% ER+, 62% PR+       | Planned 1000 pts, closed early due to slow accrual; RT according to standard practice of each centre; | Median follow-up 108 mo<br>DFS HR=0.99 (95% CI 0.77–1.26), p=0.91<br>OS HR=0.85 (95% CI 0.62–1.15), p=0.29<br>5–y DFS 78.4% FEC→ P vs 78.5% FEC<br>9–y DFS 62.5% FEC→ P vs 62.9% FEC<br>5–y OS 88.6% FEC→ P vs 86.1% FEC<br>9–y OS 77% FEC→ P vs 73.9% FEC                                                                                                                                                                                                                                                   |



| Author, year               | Trial name, enrolment period | Intervention                                                                                                                                                                                                                                                                                                                                                                                                                                               | # pts | Inclusion criteria                   | Staging                                               | Other characteristics*                                                             | Other                                                                                                                                                | Results                                                                                                                                                                                                                                                                                                                                                                 |
|----------------------------|------------------------------|------------------------------------------------------------------------------------------------------------------------------------------------------------------------------------------------------------------------------------------------------------------------------------------------------------------------------------------------------------------------------------------------------------------------------------------------------------|-------|--------------------------------------|-------------------------------------------------------|------------------------------------------------------------------------------------|------------------------------------------------------------------------------------------------------------------------------------------------------|-------------------------------------------------------------------------------------------------------------------------------------------------------------------------------------------------------------------------------------------------------------------------------------------------------------------------------------------------------------------------|
|                            |                              |                                                                                                                                                                                                                                                                                                                                                                                                                                                            |       |                                      |                                                       |                                                                                    | HR+ administered 5 y tamoxifen or AI                                                                                                                 | Overall grade 3-4 adverse effects similar (58% FEC→ P vs 63% FEC, p=0.16); neuropathy 2.9% vs 0.2%, p=0.002; myalgia 3.2% vs 0.5%, p=0.003; cardiac 0.3% vs 0.5% (NS)<br>May be lack of power to detect small benefits                                                                                                                                                  |
| Martin, 2008 <sup>59</sup> | GEICAM 9906<br><br>1999-2002 | FECx6 vs FECx4→ P (eight 1- w courses)<br><br>FEC: F (600 mg/m <sup>2</sup> ) + E (90 mg/m <sup>2</sup> ) + C (600 mg/m <sup>2</sup> ) q3wx6<br><br>FEC→ P: F (600 mg/m <sup>2</sup> ) + E (90 mg/m <sup>2</sup> ) + C (600 mg/m <sup>2</sup> ) q3wx4→ P after three weeks no treatment P(100 mg/m <sup>2</sup> ) q1wx8<br><br>Primary GCSF prophylaxis not permitted, but mandatory for pts with at least one episode of febrile neutropenia or infection | 1246  | N+ (at least 6 nodes isolated), T1-3 | 62% N1,<br>38% N2-3<br><br>43% T1<br>52% T2<br>36% T3 | 54% premenopausal<br>82% HR+ (investigator report), 66% HR+ (central)<br>20% HER2+ | Tamoxifen if ER+ or PR+, AIs allowed in menopausal pts after Sept 2005; RT after BCS, PMRT according to institutional guidelines (mostly T3 or N2-3) | At 5 y, FEC→ P vs FEC<br>DFS 78.5% in FEC→ P, 72.1% in FEC, p=0.006<br>OS: 22% reduction, HR=0.78 (95% CI 0.57-1.06), p=0.110<br>Risk of relapse: 23% reduction, HR=0.77 (95% CI 0.62-0.95), p=0.022<br>No significant interaction between HER2 or hormone receptor status and paclitaxel treatment                                                                     |
| Martin, 2010 <sup>60</sup> | GEICAM 9906                  | See Martin, 2008 <sup>59</sup><br><br>Molecular predictors of efficacy                                                                                                                                                                                                                                                                                                                                                                                     |       |                                      |                                                       |                                                                                    | 928 (74.5%) samples had evaluation of molecular subtype                                                                                              | At 7-y follow-up, FEC→ P vs FEC:<br>Benefit with FEC→P is now statistically significant<br>DFS 75% vs 68%, HR=0.75 (95% CI 0.61-0.93), p=0.007<br>OS: 84% vs 79%, HR=0.74 (95% CI 0.56-0.96), p=0.026<br>Benefit small in absolute terms, attempted to find subgroups that benefit more<br>Superiority of FEC→ P greater in HR-/HER2- (TN), particularly in subset with |



| Author, year                   | Trial name, enrolment period | Intervention                                                                                                                                                                                                                                                                                                                                                                                                                                                                                                            | # pts | Inclusion criteria | Staging                                                                                    | Other characteristics*                                      | Other                                                                                                                                                      | Results                                                                                                                                                                                                                                                                                                                                                                                                                  |
|--------------------------------|------------------------------|-------------------------------------------------------------------------------------------------------------------------------------------------------------------------------------------------------------------------------------------------------------------------------------------------------------------------------------------------------------------------------------------------------------------------------------------------------------------------------------------------------------------------|-------|--------------------|--------------------------------------------------------------------------------------------|-------------------------------------------------------------|------------------------------------------------------------------------------------------------------------------------------------------------------------|--------------------------------------------------------------------------------------------------------------------------------------------------------------------------------------------------------------------------------------------------------------------------------------------------------------------------------------------------------------------------------------------------------------------------|
|                                |                              |                                                                                                                                                                                                                                                                                                                                                                                                                                                                                                                         |       |                    |                                                                                            |                                                             |                                                                                                                                                            | <p>basal phenotype (TN and either EGFR+ or cytokeratins 5/6+) and for luminal A (p=0.034)</p> <p>TN: FEC→ P reduced likelihood of relapse by 47% and yielded an absolute benefit of 18% DFS compared with FEC (74% vs 56%), p=0.015</p> <p>Basal (N=79): DFS 83% FEC→ P vs 57% FEC, p=0.018</p> <p>HR=0.33 (95% CI 0.12–0.87),p=0.024</p>                                                                                |
| Fountzilas, 2008 <sup>61</sup> | HE 10/00<br>2000–2005        | <p>Group A: Sequential E→ P→ CMF vs<br/>Group B: Concurrent E+P→ CMF</p> <p>E→ P→ CMF: E (110 mg/m<sup>2</sup>) q2wx3→ P (250 mg/m<sup>2</sup>) q2wx3→ C (840 mg/m<sup>2</sup>) + M (57 mg/m<sup>2</sup>) + F (840 mg/m<sup>2</sup>) q2wx3</p> <p>E+P→ CMF: E (83 mg/m<sup>2</sup>) + P (187 mg/m<sup>2</sup>) q3wx4→ C (840 mg/m<sup>2</sup>) + M (57 mg/m<sup>2</sup>) + F (840 mg/m<sup>2</sup>) q2wx3</p> <p>Cumulative dose almost identical in both groups</p> <p>Prophylactic GCSF for dose-dense treatments</p> | 1121  | T1–4, N1–2         | <p>48% N1<br/>52% N2+ (median 3–4 positive nodes)</p> <p>32% T1<br/>57% T2<br/>11% T3+</p> | 69% ER+, 61% PR+, 73% HR+<br>46% premenopausal<br>33% HER2+ | 5 y tamoxifen for HR+, 2 y ovarian suppression if premenopausal, switched in 2004 to 2–3 y tamoxifen + 2–3 y exemestane; RT for BCS, PMRT if N2+and/or T3+ | <p>Group A (dose-dense) had more thrombocytopenia (1.1% vs 0%, p=0.03), severe sensory neuropathy (9.5% vs 2.1%, p&lt;0.001), hypersensitivity (5.2% vs 1.4%, p&lt;0.001), severe arthralgias/myalgias (3% vs 0.8%, p=0.01), and discontinuation of chemotherapy (6.5% vs 3%, p=0.003)</p> <p>Conclude rates of severe adverse effects low, but significantly increased with dose-dense sequential regimen (Group A)</p> |
| Gogas, 2012 <sup>62</sup>      | HE 10/00<br>2000–2005        | See Fountzilas 2008 <sup>61</sup>                                                                                                                                                                                                                                                                                                                                                                                                                                                                                       |       |                    |                                                                                            |                                                             |                                                                                                                                                            | <p>Median follow-up 76 mo; 5-y survival rates, Group A (sequential) vs B (concurrent)</p> <p>DFS: 74% and 74%, p=0.78</p> <p>OS: 86% and 85%, p=0.45</p> <p>Subgroup by disease subtypes: no significant differences in response by hormone receptor status, HER2 status, TN</p>                                                                                                                                         |



| Author, year                | Trial name, enrolment period | Intervention                                                                                                                                                                                                                                                                                                                                                                                                                                                                                                                                                   | # pts | Inclusion criteria                                                                | Staging                                                                                       | Other characteristics*                                                                        | Other                                                                                                                                                                                                                    | Results                                                                                                                                                                                                                                                                                                                                                                                                                                                                                                                                                                                                                                                                                                                             |
|-----------------------------|------------------------------|----------------------------------------------------------------------------------------------------------------------------------------------------------------------------------------------------------------------------------------------------------------------------------------------------------------------------------------------------------------------------------------------------------------------------------------------------------------------------------------------------------------------------------------------------------------|-------|-----------------------------------------------------------------------------------|-----------------------------------------------------------------------------------------------|-----------------------------------------------------------------------------------------------|--------------------------------------------------------------------------------------------------------------------------------------------------------------------------------------------------------------------------|-------------------------------------------------------------------------------------------------------------------------------------------------------------------------------------------------------------------------------------------------------------------------------------------------------------------------------------------------------------------------------------------------------------------------------------------------------------------------------------------------------------------------------------------------------------------------------------------------------------------------------------------------------------------------------------------------------------------------------------|
|                             |                              |                                                                                                                                                                                                                                                                                                                                                                                                                                                                                                                                                                |       |                                                                                   |                                                                                               |                                                                                               |                                                                                                                                                                                                                          | Conclude no DFS or OS benefit Group<br>A vs B                                                                                                                                                                                                                                                                                                                                                                                                                                                                                                                                                                                                                                                                                       |
| Burnell, 2010 <sup>40</sup> | MA.21<br>2000–2005           | <p>CEF vs dd EC→ P vs AC→ P</p> <p>CEF: C (75 mg/m<sup>2</sup>; days 1–14) + E (60 mg/m<sup>2</sup>; days 1&amp;8) + F (500 mg/m<sup>2</sup>; days 1&amp;8) q4w×6</p> <p>EC→ P: E (120 mg/m<sup>2</sup>) + C (830 mg/m<sup>2</sup>) q2w×6→ P (175 mg/m<sup>2</sup>) q3w×4</p> <p>AC→ P: A (60 mg/m<sup>2</sup>) + C (600 mg/m<sup>2</sup>) q3w×4→ P (175 mg/m<sup>2</sup>) q3w×4</p> <p>Filgrastim and epoetin permitted with CEF or AC→ P, required with EC→ P;<br/>Prespecified interim analysis for RFS after 261 events at median follow-up of 30.4 mo</p> | 2104  | N+ or high risk<br>N0 (≥1cm plus one or more of: ER-, grade 3, or LVI); age ≤60 y | <p>28% N0,<br/>43% N1,<br/>22% N2,<br/>6% N3</p> <p>34% T1<br/>55% T2<br/>9% T3<br/>1% T4</p> | Premenopausal or early post-menopausal (age <60 y); 41% ER+ 11% HER2+, 70% HER2-, 19% unknown | Stratified by number of positive nodes, type of surgery, ER status; BCS +RT or mastectomy (PMRT permitted); ER+ received tamoxifen, AI allowed after Oct 2004; trastuzumab for 1 y for HER2+ was allowed after June 2005 | <p>3-y adjusted RFS for CEF, EC/P, AC/P were 90.1%, 89.5%, 85% (p=0.001); pairwise comparison:</p> <ul style="list-style-type: none"> <li>AC→ P vs CEF: HR=1.49 (1.12–1.99), p=0.005</li> <li>AC→ P vs EC/P HR=1.68 (1.25–2.27), p=0.0006</li> <li>EC→ P vs CEF: HR=0.89 (95% CI 0.64–1.22), p=0.46</li> </ul> <p>Adverse effects: febrile neutropenia was 22.3% and 16.4% in CEF and EC→ P pts compared with 4.8% in AC→ P (p=0.001); erythrocyte transfusion 23.8%, 39.9%, 1.6% (p&lt;0.001); grade 3–4 cardiotoxicity higher in CEF (2.1%) vs 0.7% and 0.3% (p&lt;0.001); full adverse effects comparison listed</p> <p>AC→ P inferior for RFS but fewer adverse effects [see CALGB 9741 for higher-dose AC→ P<sup>63</sup>]</p> |
| Polyzos, 2010 <sup>64</sup> | HORG<br>1995–2004            | <p>T→ EC vs FEC</p> <p>T→ EC: T (100 mg/m<sup>2</sup>)→ E (75 mg/m<sup>2</sup>) + C (700 mg/m<sup>2</sup>) q3w×4</p> <p>FEC: E (75 mg/m<sup>2</sup>) + C (700 mg/m<sup>2</sup>) + F (700 mg/m<sup>2</sup>) q3w×6</p> <p>Epirubicin dose 75 mg/m<sup>2</sup> was lower</p>                                                                                                                                                                                                                                                                                      | 756   | N+, ALND with at least 10 nodes removed, early, Stage II-III A                    | <p>35% N1, 45% N2, 21% N3</p> <p>53% T1, 40% T2, 5% T3, 3% unknown</p>                        | 71% ER+ and/or PR+ 20% ER-PR- 10% unknown<br><br>38% premenopausal                            | 60%-70% HR+ and subsequently received adjuvant hormonal treatment; RT for all BCS, PMRT at                                                                                                                               | <p>Median follow-up of 5 y</p> <p>Relapse: 28% T→ EC vs 33% FEC, p=0.181</p> <p>DFS 72.6% (63.8–81.3) and 67.2% (58.0–76.4%), p=0.041;</p> <p>No difference in OS rates (83.8% vs 81.4%, p=0.533)</p> <p>T→ EC had increase neutropenia requiring GCSF (90.5% vs 74.1%, p=0.0001)</p>                                                                                                                                                                                                                                                                                                                                                                                                                                               |



| Author, year                | Trial name, enrolment period | Intervention                                                                                                                                                                                                                                                                                                                                                                                                                                                                                                                                                                                                                                                                             | # pts | Inclusion criteria                    | Staging                                  | Other characteristics* | Other                                                                                                                                                                                                                                       | Results                                                                                                                                                                                                                                                                                                                                                                                                                                                                                                                                                                                                                                                                                                                                                                                                                                                                 |
|-----------------------------|------------------------------|------------------------------------------------------------------------------------------------------------------------------------------------------------------------------------------------------------------------------------------------------------------------------------------------------------------------------------------------------------------------------------------------------------------------------------------------------------------------------------------------------------------------------------------------------------------------------------------------------------------------------------------------------------------------------------------|-------|---------------------------------------|------------------------------------------|------------------------|---------------------------------------------------------------------------------------------------------------------------------------------------------------------------------------------------------------------------------------------|-------------------------------------------------------------------------------------------------------------------------------------------------------------------------------------------------------------------------------------------------------------------------------------------------------------------------------------------------------------------------------------------------------------------------------------------------------------------------------------------------------------------------------------------------------------------------------------------------------------------------------------------------------------------------------------------------------------------------------------------------------------------------------------------------------------------------------------------------------------------------|
|                             |                              | than used in other studies; prophylactic GCSF not permitted, but allowed in subsequent courses if febrile neutropenia or grade 3-4 neutropenia or >7 d delay because of neutropenia                                                                                                                                                                                                                                                                                                                                                                                                                                                                                                      |       |                                       |                                          |                        | physician discretion                                                                                                                                                                                                                        | T → EC had higher significantly more stomatitis, diarrhea, hypersensitivity reactions, nail disorders, neurotoxicities<br>Conclude: improved DFS in pts with N+ cancer at expense of increased but manageable myelotoxicity                                                                                                                                                                                                                                                                                                                                                                                                                                                                                                                                                                                                                                             |
| Joensuu, 2009 <sup>65</sup> | FinHer<br>2000-2003          | T → FEC vs vinorelbine → FEC<br><br>T → FEC: T (100 mg/m <sup>2</sup> ) q3wx3 → F (600 mg/m <sup>2</sup> ) + E (60 mg/m <sup>2</sup> ) + C (600 mg/m <sup>2</sup> ) q3wx3<br><br>Vinorelbine → FEC: Vinorelbine (25 mg/m <sup>2</sup> ; days 1,8,15) q3wx3 → F (600 mg/m <sup>2</sup> ) + E (60 mg/m <sup>2</sup> ) + C (600 mg/m <sup>2</sup> ) q3wx3<br><br>Further randomization to receive trastuzumab if HER2+ (N=232, 2+ or 3+ on scale of 0-3+ by IHC, and 6+ gene copies)<br><br>Prophylactic GCSF not recommended unless 1+ episodes of febrile neutropenia or severe infection<br><br>Dose of T reduced from 100 to 80 mg/m <sup>2</sup> in Feb 2002 due to neutropenic fevers | 1010  | N+ or high risk<br>N0 (>2 cm and PR-) | 56% >2 cm<br>11% N0<br>61% N1<br>28% N2+ | 72% ER+<br>23% HER2+   | Tamoxifen for 5 y if HR+, amended Dec 2005 to allow switching to AI for post-menopausal pts after 2-3 y and to allow administration of AI for addition 2-3 y after completion of 5 y tamoxifen; RT according to each institutions guideline | 5-y survival rates calculated<br>OS=90.7% for entire series<br>T vs vinorelbine, HR=0.70 (95% CI 0.46-1.05), p=0.086<br>DDFS rate (pts with only local recurrence were censored):<br>T vs vinorelbine: HR=0.66 (95% CI 0.49-0.91), p=0.010<br>Subgroup HER2+:<br>Trastuzumab better than without: HR=0.65 (95% CI 0.38-1.12), p=0.12; adjusted for nodal metastases HR=0.57, p=0.047<br>T + trastuzumab better than T, HR=0.32 (95% CI 0.12-0.89), p=0.029<br>T + trastuzumab better than vinorelbine + trastuzumab, HR=0.31 (95% CI 0.11-0.83), p=0.020<br>Vinorelbine ± trastuzumab HR=0.92 (95% CI 0.47-1.83), p=0.82<br>Median left ventricular ejection fraction of trastuzumab-treated pts remained unaltered during 5-y follow-up<br>HER2- subgroup<br>DDFS: 88.2% T vs 83.5% vinorelbine, HR=0.69 (95% CI 0.47-1.01), p=0.058<br>Docetaxel more favourable than |



| Author, year                                                                                      | Trial name, enrolment period               | Intervention                                                                                                                                                                                                                                                                                                                                                          | # pts                            | Inclusion criteria    | Staging       | Other characteristics* | Other                                                                                                                                    | Results                                                                                                                                                                                                                                                                                                                                                                                                                                                                                                           |
|---------------------------------------------------------------------------------------------------|--------------------------------------------|-----------------------------------------------------------------------------------------------------------------------------------------------------------------------------------------------------------------------------------------------------------------------------------------------------------------------------------------------------------------------|----------------------------------|-----------------------|---------------|------------------------|------------------------------------------------------------------------------------------------------------------------------------------|-------------------------------------------------------------------------------------------------------------------------------------------------------------------------------------------------------------------------------------------------------------------------------------------------------------------------------------------------------------------------------------------------------------------------------------------------------------------------------------------------------------------|
|                                                                                                   |                                            |                                                                                                                                                                                                                                                                                                                                                                       |                                  |                       |               |                        |                                                                                                                                          | vinorelbine overall, and subsets N0, N+,                                                                                                                                                                                                                                                                                                                                                                                                                                                                          |
| Nitz, 2009 <sup>66</sup><br>[abstract]                                                            | EC-Doc<br>WSG/AGO<br>AM02<br><br>2000-2005 | EC→ T vs control (FEC, N=828 or CMF, N=175)<br><br>EC→ T: E (90 mg/m <sup>2</sup> ) + C (600 mg/m <sup>2</sup> ) q3wx4→ T (100 mg/m <sup>2</sup> ) q3wx4<br><br>FEC: F (500 mg/m <sup>2</sup> ) + E (100 mg/m <sup>2</sup> ) + C (500 mg/m <sup>2</sup> ) q3wx6<br><br>CMF: C (600 mg/m <sup>2</sup> ) + M (40 mg/m <sup>2</sup> ) + F (600 mg/m <sup>2</sup> ) q4wx6 | 2012                             | N1, intermediate risk | Median 2.0 cm | 78% HR+                |                                                                                                                                          | Median follow-up 41 mo, estimated 5-y survival rates<br>EFS: 91% vs 86%, p=0.005 (better in EC→ T arm)<br>OS: 95% vs 90%, p=0.004 (better in EC→ T arm)<br>EC→ T vs FEC: EFS 91% vs 85%, HR=0.58, p=0.004<br>EC→ T vs FEC: OS 95% vs 91%, p=0.03<br>HR+ subgroup, HR=0.51 in favour of EC→T, p=0.007<br>Conclude EC→ T is superior for EFS and OS over FEC                                                                                                                                                        |
| Huober, 2010 <sup>67</sup><br>Nitz, 2011 <sup>68</sup><br>Gluz, 2011 <sup>69</sup><br>[abstracts] | EC-Doc                                     | See previous entry in table                                                                                                                                                                                                                                                                                                                                           | 2012 (772 for protein analysis ) |                       |               |                        | 20% HER2+<br>≈25% Topo-II aberration (deletion or amplification)<br>49% HER2+ and 14% HER2- tumours had Topo-II aberration<br>65% TIMP-1 | Median follow-up 64 mo: report 5-y survival rates<br>DFS 90% EC→ T vs 80% FEC, p=0.006<br>OS: 95% EC→ T vs 92% FEC, p=0.022<br>DFS highest in luminal A (97%), lowest in TN basal-like (72%)<br>Significant benefit of EC→ T vs FEC for DFS in pts with luminal B cancer: HR=0.41 (95% CI 0.22-0.77), p=0.004<br>In multivariate model, EC→ T vs FEC, HR=0.44 (95% CI 0.26-0.76), p=0.003<br>EC→ T better than FEC in HR- non-basal like, HR=0.385 (95% CI 0.14-1.07), p=0.057<br>Prospective WSG Plan B trial to |

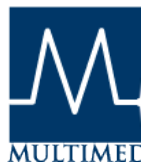

| Author, year                                                                              | Trial name, enrolment period                                  | Intervention                                                                                                                                                                                                                                                                                                                                                                                                                         | # pts | Inclusion criteria                                                                            | Staging                                                      | Other characteristics*                                          | Other                                                                                                                                               | Results                                                                                                                                                                                                                                                                                                                                                                                                                                                                                                                        |
|-------------------------------------------------------------------------------------------|---------------------------------------------------------------|--------------------------------------------------------------------------------------------------------------------------------------------------------------------------------------------------------------------------------------------------------------------------------------------------------------------------------------------------------------------------------------------------------------------------------------|-------|-----------------------------------------------------------------------------------------------|--------------------------------------------------------------|-----------------------------------------------------------------|-----------------------------------------------------------------------------------------------------------------------------------------------------|--------------------------------------------------------------------------------------------------------------------------------------------------------------------------------------------------------------------------------------------------------------------------------------------------------------------------------------------------------------------------------------------------------------------------------------------------------------------------------------------------------------------------------|
|                                                                                           |                                                               |                                                                                                                                                                                                                                                                                                                                                                                                                                      |       |                                                                                               |                                                              |                                                                 |                                                                                                                                                     | validate these results<br>Ki-67 cut-off of 20% was significant regarding interaction with therapy (HR=0.467, p=0.02)<br>DFS for subgroups, EC→ T vs FEC<br>HER2: HR=0.29 (95% CI 0.12-0.7) p=0.006<br>HER2- : EC→ T vs FEC, not significant, p=0.18<br>Topo-II aberration: HR=0.28 (95% CI 0.11-0.69), p=0.006<br>Topo-II normal, not significant, p=0.16<br>TIMP-1 immunoreactive: HR=0.57, p=0.025<br>TIMP-1 negative, not significant, p=0.14<br>In multivariate model, only high Ki-67 had significant therapy interaction |
| <b>Taxane + anthracycline (sequential) vs doubled non-taxane ( anthracycline) regimen</b> |                                                               |                                                                                                                                                                                                                                                                                                                                                                                                                                      |       |                                                                                               |                                                              |                                                                 |                                                                                                                                                     |                                                                                                                                                                                                                                                                                                                                                                                                                                                                                                                                |
| Ellis, 2009 <sup>70</sup>                                                                 | TACT<br>CRUK01/00<br>1<br>ISRCTN797<br>18493<br><br>2001-2003 | FEC→ T vs control (either FEC or E→ CMF)<br><br>FEC→ T: F (600 mg/m <sup>2</sup> ) + E (60 mg/m <sup>2</sup> ) + C (600 mg/m <sup>2</sup> ) q3wx4→ T (100 mg/m <sup>2</sup> ) q3wx4<br><br>FEC: F (600 mg/m <sup>2</sup> ) + E (60 mg/m <sup>2</sup> ) + C (600 mg/m <sup>2</sup> ) q3wx8<br><br>E→ CMF: E (100 mg/m <sup>2</sup> ) q3wx4→ C (600 mg/m <sup>2</sup> ) + M (40 mg/m <sup>2</sup> ) + F (600 mg/m <sup>2</sup> ) q4wx4 | 4162  | pT1-3a,<br>pN0-1<br><br>Early, N+ or high risk N0 (grade 3, HR-, or lympho-vascular invasion) | 34% T1<br>56% T2<br>9% T3<br><br>20% N0<br>44% N1<br>36% N2+ | 69% ER+<br>31% ER-<br><br>20% HER2+<br>65% HER2-<br>14% unknown | Tamoxifen for 5 y if HR+, from 2005 allowed Als as an alternative; pts with HER2+ allowed to enter trials assessing trastuzumab; RT after BCS, PMRT | Median follow-up 62 mo, report survival rates at 5 y<br>DFS: 75.6% vs 74.3 %, HR=0.95 (95% CI 0.85-1.08), p=0.44<br>OS: 82.5% vs 83%, HR=0.99 (95% CI 0.86-1.14), p=0.91<br>No difference due to choice of control regimen<br>No strong evidence for differential effect by ER status or HER2 status<br>Exploratory analysis consistent with improvement with taxane for ER- HER2+ subgroup, DFS HR=0.78 (95% CI 0.55-1.09),                                                                                                   |



| Author, year              | Trial name, enrolment period | Intervention                                                                                                                                                                                                                                                                                                                                                                                                                 | # pts | Inclusion criteria                                           | Staging                                            | Other characteristics*                                    | Other                                                                                                                                                                      | Results                                                                                                                                                                                                                                                                                                                                                                                                                                                                                                                                                                                                                              |
|---------------------------|------------------------------|------------------------------------------------------------------------------------------------------------------------------------------------------------------------------------------------------------------------------------------------------------------------------------------------------------------------------------------------------------------------------------------------------------------------------|-------|--------------------------------------------------------------|----------------------------------------------------|-----------------------------------------------------------|----------------------------------------------------------------------------------------------------------------------------------------------------------------------------|--------------------------------------------------------------------------------------------------------------------------------------------------------------------------------------------------------------------------------------------------------------------------------------------------------------------------------------------------------------------------------------------------------------------------------------------------------------------------------------------------------------------------------------------------------------------------------------------------------------------------------------|
|                           |                              | GCSF used according to local practice                                                                                                                                                                                                                                                                                                                                                                                        |       |                                                              |                                                    |                                                           | according to local guidelines                                                                                                                                              | DFS for pts with N+ cancer HR=0.70 (95% CI 0.49-1.00)<br>Acute grade 3 or 4 adverse events significantly greater in experimental group than in control group (p<0.0001), most frequent was neutropenia, leucopenia, lethargy; late adverse effects also more frequent with FEC→ T<br>In QoL substudy there was significantly greater impairment in experimental group for physical, role, emotional and social functioning, pain, fatigue, global QoL, but less nausea and vomiting; returned to close to baseline levels over 24 mo<br>Conclude: did not show any overall gain from addition of T to standard anthracycline therapy |
| Roche, 2006 <sup>71</sup> | PACS 01<br>1997-2000         | FEC vs FEC→ T<br><br>FEC: F (500 mg/m <sup>2</sup> ) + E (100 mg/m <sup>2</sup> ) + C (500 mg/m <sup>2</sup> ) q3wx6<br><br>FEC→ T: F (500 mg/m <sup>2</sup> ) + E (100 mg/m <sup>2</sup> ) + C (500 mg/m <sup>2</sup> ) q3wx3→ T (100 mg/m <sup>2</sup> ) q3wx3<br><br>Primary prophylaxis with GCSF prohibited; administered for subsequent cycles of FEC in case of low granulocyte/platelet count or febrile neutropenia | 1999  | Operable, N+ (based on at least 5 nodes removed), Stage <T4a | 62% N1<br>38% N2+<br><br>37% T1<br>55% T2<br>8% T3 | 61% premenopausal<br>79% HR+, 21% HR-<br>74% ER+, 65% PR+ | Tamoxifen for 5 y if HR+ and postmenopausal (optional for premenopausal until Dec 1998, after which it was required), some centres also gave for HR- RT after BCS, PMRT to | Median follow-up 60 mo, report 5-y survival rates<br>DFS: 78.4% FEC→ T vs 73.2% FEC, HR=0.80 (95% CI 0.67-0.96), p=0.012<br>OS: 90.7% FEC→ T vs 86.7% FEC, HR=0.73 (95% CI 0.56-0.94), p=0.017<br>In subgroup analysis for DFS, FEC→ T was better or equivalent in all groups; there was significant benefit of FEC→ T for female pts aged ≥50 y or postmenopausal, but not premenopausal or aged <50 y<br>Grade 3-4 neutropenia, need for hematopoietic growth factor, incidence of nausea/vomiting higher with FEC<br>Febrile neutropenia (fourth cycle), stomatitis, edema, nail disorders higher with                            |





| Author, year                                                 | Trial name, enrolment period | Intervention                                                                                                                                                      | # pts | Inclusion criteria | Staging | Other characteristics*                        | Other                                                                                                                               | Results                                                                                                                                                                                                                                                                                                                                                |
|--------------------------------------------------------------|------------------------------|-------------------------------------------------------------------------------------------------------------------------------------------------------------------|-------|--------------------|---------|-----------------------------------------------|-------------------------------------------------------------------------------------------------------------------------------------|--------------------------------------------------------------------------------------------------------------------------------------------------------------------------------------------------------------------------------------------------------------------------------------------------------------------------------------------------------|
|                                                              |                              |                                                                                                                                                                   |       |                    |         |                                               | chest wall, supra-clavicular area, internal mammary chain recommended following mastectomy but irradiation of the axilla prohibited | FEC→ T<br>Fewer cardiac events after FEC→ T due to lower anthracycline cumulative dose                                                                                                                                                                                                                                                                 |
| Coudert, 2009 <sup>72</sup><br>[abstract] 2012 <sup>73</sup> | PACS 01                      | See previous entry in table <sup>71</sup>                                                                                                                         |       |                    |         |                                               |                                                                                                                                     | Update at median follow-up of 92.8 mo, report 8-y survival rates<br>DFS: 70.2% FEC→ T vs 65.8% FEC, HR=0.85 (95% CI 0.73-0.99), p=0.036<br>OS: 83.2% FEC→ T vs 78.0% FEC, HR=0.75 (95% CI 0.62-0.92), p=0.007<br>Cardiac events 0.4% FEC→ T vs 2.1% FEC<br>Confirms previous 5-y results                                                               |
| Penault-Llorca, 2009 <sup>74</sup>                           | PACS 01                      | See previous entry in table <sup>71</sup><br>Measured ER, PR, Ki-67, HER2 by IHC in 55% of original samples (N=1190), and selected those ER+ for further analysis | 798   | ER+ subset         |         | 21% Ki-67 >20%<br>9% HER2+<br>62% PR+<br>>10% |                                                                                                                                     | ER+ tumours (this study), median follow-up 58.7 mo<br>DFS, 5 y: 82% FEC→ T vs 77% FEC, p=0.11<br>Relapse, FEC→ T vs FEC:<br>All: HR=0.82 (0.60-1.12), p=0.22<br>Ki-67+ HR=0.51 (95% CI 0.26-1.01)<br>Ki-67- HR=1.03 (95% CI 0.69-1.55)<br>Hazard ratio for interaction with T<br>HR=0.53 (95% CI 0.24-1.16), p=0.11<br>No trend for interaction with T |



| Author, year                  | Trial name, enrolment period | Intervention                                                                                                                                                                                          | # pts | Inclusion criteria | Staging | Other characteristics* | Other                                                                                                                                    | Results                                                                                                                                                                                                                                                                                                                                                                                                                                                                                                                                                                                                                                                                                                                                                                                                                                                                                                       |
|-------------------------------|------------------------------|-------------------------------------------------------------------------------------------------------------------------------------------------------------------------------------------------------|-------|--------------------|---------|------------------------|------------------------------------------------------------------------------------------------------------------------------------------|---------------------------------------------------------------------------------------------------------------------------------------------------------------------------------------------------------------------------------------------------------------------------------------------------------------------------------------------------------------------------------------------------------------------------------------------------------------------------------------------------------------------------------------------------------------------------------------------------------------------------------------------------------------------------------------------------------------------------------------------------------------------------------------------------------------------------------------------------------------------------------------------------------------|
|                               |                              |                                                                                                                                                                                                       |       |                    |         |                        |                                                                                                                                          | observed for HER2 or PR status                                                                                                                                                                                                                                                                                                                                                                                                                                                                                                                                                                                                                                                                                                                                                                                                                                                                                |
| Jacquemier 2011 <sup>75</sup> | PACS 01                      | See previous entry in table <sup>71</sup><br>Prepared tissue microarray for 1099 of the cases that had IHC <sup>74</sup> , and evaluated expression of ER, PR, Ki-67, HER2 and 30 additional proteins | 1099  |                    |         |                        | Defined molecular subtypes:<br>luminal A (HR+, HER2-, Ki-67-),<br>luminal B (HR+, HER2-, Ki-67+),<br>HER2 over-expressing TN (HR- HER2-) | In multivariate analysis, PR- and Ki-67+ remained associated with shorter DFS<br>Interaction of protein expression and FEC→ T only significant for Ki-67, p=0.012<br>Ki-67+ HR=0.51 (95% CI 0.33-0.79), p=0.003<br>Ki-67- HR=1.10 (95% CI 0.75-1.61), p=0.612<br>Molecular subtypes analyzed for docetaxel benefit on risk of relapse:<br>Luminal B: 53% reduction, HR=0.47 (95% CI 0.22-1.01), p=0.05<br>HER2 overexpressing: 34% reduction, HR=0.66 (95% CI 0.37-1.19), p=0.14<br>TN: 12% reduction, HR=0.88 (95% CI 0.49-1.57), p=0.67<br>Luminal A: 16% higher with T, HR=1.16 (95% CI 0.73-1.84), p=0.52<br>Interaction between benefit of T and each subtype was significant for luminal B (p=0.047), borderline for HER2 overexpressing (p=0.14) and not significant for TN (p=0.46)<br>Added value of molecular subtype compared with Ki-67 alone did not show any significant added predictive value |
| Ladoire, 2012 <sup>76</sup>   | PACS 01                      | See previous entry in table <sup>71</sup><br>Assessed FOXP3 status in subgroup of 1097 pts by IHC                                                                                                     | 1097  |                    |         |                        | 37% FOXP3 expressed                                                                                                                      | Median follow-up 96 mo, FEC→ T vs FEC<br>OS shorter in pts with FOXP3-<br>For FOXP3-, OS shorter with FEC than FEC→ T<br>For FOXP3+, no difference between FEC and FEC→ T                                                                                                                                                                                                                                                                                                                                                                                                                                                                                                                                                                                                                                                                                                                                     |



| Author, year                | Trial name, enrolment period     | Intervention                                                                                                                                                                                                                                                                                                                                                                                                            | # pts | Inclusion criteria                                              | Staging                                                                    | Other characteristics*           | Other                                                                                        | Results                                                                                                                                                                                                                                                                                                                                                                                                                                                                                                                                                                                                    |
|-----------------------------|----------------------------------|-------------------------------------------------------------------------------------------------------------------------------------------------------------------------------------------------------------------------------------------------------------------------------------------------------------------------------------------------------------------------------------------------------------------------|-------|-----------------------------------------------------------------|----------------------------------------------------------------------------|----------------------------------|----------------------------------------------------------------------------------------------|------------------------------------------------------------------------------------------------------------------------------------------------------------------------------------------------------------------------------------------------------------------------------------------------------------------------------------------------------------------------------------------------------------------------------------------------------------------------------------------------------------------------------------------------------------------------------------------------------------|
|                             |                                  |                                                                                                                                                                                                                                                                                                                                                                                                                         |       |                                                                 |                                                                            |                                  |                                                                                              | Interaction between FOXP3 and treatment arm was not significant; however, the statistical power of the interaction test was 13%                                                                                                                                                                                                                                                                                                                                                                                                                                                                            |
| Sakr, 2013 <sup>77</sup>    | Mansoura University<br>2006–2010 | FEC×3→ T×3 vs FEC×6<br><br>FEC (500/100/500mg/m <sup>2</sup> ) q3w×3→ T(100mg/m <sup>2</sup> )q3w×3 vs FEC (500/100/500mg/m <sup>2</sup> ) q3w×6                                                                                                                                                                                                                                                                        | 657   | Had surgery + AD with clear margins, high risk (T3–4 and/or N+) | 34% T1,<br>51% T2,<br>7% T3<br>64% N1<br>36% N2+                           | 79% HR+<br>60% pre-menopausal    | Almost all received RT,<br>78% received tamoxifen                                            | Median 61 mo from randomization<br>•5–y DFS 74% FEC vs 78% FEC→ T<br>•Multivariate analysis found 17% reduction in relative risk of relapse with FEC→ T (p=0.034); difference found in N2+ subgroup (p=0.042) but not N1subgroup; benefit of FEC→ T in female pts aged ≤50 y (p=0.03) but not aged >50 y (p=0.65)<br>Fewer cardiac events with FEC→ T (0.3% vs 1.8%, p=0.02), less nausea-vomiting (11.2% vs 19%, p=0.001), more edema (3.6% vs 0.3%, p=0.001), and nail disorders (5.1% vs 0.9%, p=0.001)                                                                                                 |
| Coombes, 2011 <sup>78</sup> | DEVA<br>1997–2005                | E vs E→ T<br><br>E: E (50 mg/m <sup>2</sup> ; days 1&8) q4w×6<br><br>E→ T: E (50 mg/m <sup>2</sup> ; days 1&8) q4w×3→ T (100 mg/m <sup>2</sup> ; day 1) q3w×3 + dexamethasone 8mg orally 2×daily for 3 d each cycle<br><br>Optional second random assignment of timing of tamoxifen (concurrently with chemotherapy or sequentially) in some centres, to be reported separately<br><br>Prophylactic GCSF recommended in | 803   | Post-menopausal, N+, early                                      | 0.5% N0<br>66% N1<br>32% N2<br>1% unknown<br><br>44% T1<br>49% T2<br>6% T3 | 78% HR+<br>19% HR–<br>3% unknown | Tamoxifen received by all pts, amended in 2001 to be omitted if HR– and in 2007 to allow AIs | Median follow-up 64.7 mo, report 5–y survival rates for E→ T vs E<br>DFS: 79.5% vs 72.7%, HR=0.68 (95% CI 0.52–0.91), p=0.008<br>OS: 88.9% vs 81.8%, HR=0.66 (95% CI 0.46–0.94), p=0.02<br>E→ T associated with greater adverse effects but no difference in QoL<br>Subgroup analysis found consistency with overall effect<br>T gave higher level of grade 3–4 adverse effects: febrile neutropenia (p<0.001), neutropenia (p<0.001), skin disorders (p=0.002), stomatitis(p=0.009), diarrhea (p=0.01), and myalgia/arthritis (p=0.04); also higher level of neurological disorders of any grade and more |



| Author, year                             | Trial name, enrolment period | Intervention                                                                                                                                                                                                                                                                                                                                                                                                                                                                                                                                                             | # pts | Inclusion criteria                                                                                 | Staging                                                                           | Other characteristics*                                                                       | Other                                                                                                                                                                                                                    | Results                                                                                                                                                                                                                                                                                                                                                                                                                                                                                                                                                                                                                                                                                                                              |
|------------------------------------------|------------------------------|--------------------------------------------------------------------------------------------------------------------------------------------------------------------------------------------------------------------------------------------------------------------------------------------------------------------------------------------------------------------------------------------------------------------------------------------------------------------------------------------------------------------------------------------------------------------------|-------|----------------------------------------------------------------------------------------------------|-----------------------------------------------------------------------------------|----------------------------------------------------------------------------------------------|--------------------------------------------------------------------------------------------------------------------------------------------------------------------------------------------------------------------------|--------------------------------------------------------------------------------------------------------------------------------------------------------------------------------------------------------------------------------------------------------------------------------------------------------------------------------------------------------------------------------------------------------------------------------------------------------------------------------------------------------------------------------------------------------------------------------------------------------------------------------------------------------------------------------------------------------------------------------------|
|                                          |                              | case of febrile neutropenia                                                                                                                                                                                                                                                                                                                                                                                                                                                                                                                                              |       |                                                                                                    |                                                                                   |                                                                                              |                                                                                                                                                                                                                          | <p>persistent effects: peripheral neuropathy, edema, and nail abnormality</p> <p>No significant differences in overall QoL</p> <p>Overall, substitution of T for E for last 3 cycles improved DFS and OS but more adverse effects</p>                                                                                                                                                                                                                                                                                                                                                                                                                                                                                                |
| Burnell, 2010 <sup>40</sup>              | MA.21<br>2000-2005           | <p>CEF vs dose-dense EC→ P vs AC→ P</p> <p>CEF: C (75 mg/m<sup>2</sup>; days 1-14) + E (60 mg/m<sup>2</sup>; days 1&amp;8) + F (500 mg/m<sup>2</sup>; days 1&amp;8) q4w×6</p> <p>EC→ P: E (120 mg/m<sup>2</sup>) + C (830 mg/m<sup>2</sup>) q2w×6→ P (175 mg/m<sup>2</sup>) q3w×4</p> <p>AC→ P: A (60 mg/m<sup>2</sup>) + C (600 mg/m<sup>2</sup>) q3w×4→ P (175 mg/m<sup>2</sup>) q3w×4</p> <p>Filgrastim and epoetin permitted with CEF or AC→ P, required with EC→ P;</p> <p>Prespecified interim analysis for RFS after 261 events at median follow-up of 30.4 m</p> | 2104  | N+ or high-risk N0 (≥1cm plus one or more of: ER-, grade 3, or lymphovascular invasion); age ≤60 y | <p>28% N0, 43% N1, 22% N2, 6% N3</p> <p>34% T1<br/>55% T2<br/>9% T3<br/>1% T4</p> | Premenopausal or early postmenopausal (<60 y old); 41% ER+ 11% HER2+, 70% HER2-, 19% unknown | Stratified by number of positive nodes, type of surgery, ER status; BCS +RT or mastectomy (PMRT permitted); ER+ received tamoxifen, AI allowed after Oct 2004; trastuzumab for 1 y for HER2+ was allowed after June 2005 | <p>3-y adjusted RFS for CEF, EC/P, AC/P were 90.1%, 89.5%, 85% (p=0.001); pairwise comparison:</p> <ul style="list-style-type: none"> <li>AC→ P vs CEF: HR=1.49 (1.12-1.99), p=0.005</li> <li>AC→ P vs EC→ P HR=1.68 (1.25-2.27), p=0.0006</li> <li>EC→ P vs CEF: HR=0.89 (95% CI 0.64-1.22), p=0.46</li> </ul> <p>Adverse effects: febrile neutropenia was 22.3% and 16.4% in CEF and EC→ P pts compared with 4.8% in AC→ P (p=0.001); erythrocyte transfusion 23.8%, 39.9%, 1.6% (p&lt;0.001); grade 3-4 cardiotoxicity higher in CEF (2.1%) vs 0.7% and 0.3% (p&lt;0.001); full adverse effects comparison listed</p> <p>AC→ P inferior for RFS but fewer adverse effects [see CALGB 9741 for higher-dose AC→ P<sup>63</sup>]</p> |
| Janni, 2012 <sup>41</sup><br>Schoenherr, | ADEBAR<br>2001-2005          | <p>E<sub>90</sub>C→ T vs FE<sub>120</sub>C (dose-intensive anthracycline)</p> <p>EC→ T: E (90 mg/m<sup>2</sup>) + C (600</p>                                                                                                                                                                                                                                                                                                                                                                                                                                             | 1502  | N2+                                                                                                |                                                                                   |                                                                                              | Anti biotics administered in 10% ECT                                                                                                                                                                                     | <p>At median follow-up 49.5 mo, <b>FEC vs EC→ T:</b></p> <p>Recurrence: 166 vs 193 events, HR=0.877 (95% CI 0.722-1.065), p=0.382</p>                                                                                                                                                                                                                                                                                                                                                                                                                                                                                                                                                                                                |



| Author, year                      | Trial name, enrolment period | Intervention                                                                                                                                                                                                                                                                                                                       | # pts | Inclusion criteria | Staging                                                                                                                       | Other characteristics*                                                                                                               | Other                                                                                                           | Results                                                                                                                                                                                                                                                                                                                                                                                                                                                                                                                                                                                                                                                                           |
|-----------------------------------|------------------------------|------------------------------------------------------------------------------------------------------------------------------------------------------------------------------------------------------------------------------------------------------------------------------------------------------------------------------------|-------|--------------------|-------------------------------------------------------------------------------------------------------------------------------|--------------------------------------------------------------------------------------------------------------------------------------|-----------------------------------------------------------------------------------------------------------------|-----------------------------------------------------------------------------------------------------------------------------------------------------------------------------------------------------------------------------------------------------------------------------------------------------------------------------------------------------------------------------------------------------------------------------------------------------------------------------------------------------------------------------------------------------------------------------------------------------------------------------------------------------------------------------------|
| 2010 <sup>42</sup><br>[abstracts] |                              | mg/m <sup>2</sup> q3wx4→ T (100 mg/m <sup>2</sup> ) q3wx4<br><br>FEC: F (500 mg/m <sup>2</sup> ; days 1&8) + E (60 mg/m <sup>2</sup> ; days 1&8) + C (75 mg/m <sup>2</sup> ; days 1&14) q4wx6                                                                                                                                      |       |                    |                                                                                                                               |                                                                                                                                      | vs 20% FEC<br>GC<br>SF administered in 39% ECT vs 61% FEC<br>Eryt hro-poietin administered in 9% ECT vs 20% FEC | OS: 131 vs 134 deaths, HR=0.996 (95% CI 0.783–1.267), p=0.969<br>Subgroup analysis found no significant difference between the two arms<br>Treatment stopped early due to adverse effects in 3.7% EC→ T and 8% FEC (p=0.0009)<br>Neutropenia grade 3–4 and febrile neutropenia similar in both groups<br>Hematological adverse effects significantly higher in FEC arm<br>Non-hematological adverse effects grade 3–4 seldom found in either arm<br>EC→ T had higher myalgia and arthralgia (12.3 vs 1.4%, p=0.0001), neurological symptoms (3.9% vs 0.3%), dermal adverse effects (4.2% vs 0.8%)<br>Conclude EC→ T is well tolerated feasible alternative to FE <sub>120</sub> C |
| Albert, 2011 <sup>79</sup>        | 1994–1998                    | P→ FAC vs FAC<br><br>P→ FAC: P (250 mg/m <sup>2</sup> ) q3wx4→ F (500 mg/m <sup>2</sup> ; days 1&4) + A (50 mg/m <sup>2</sup> ; days 1–3) + C (500 mg/m <sup>2</sup> ; day 1) q3w or q4wx4<br><br>FAC: F (500 mg/m <sup>2</sup> ; days 1&4) + A (50 mg/m <sup>2</sup> ; days 1–3) + C (500 mg/m <sup>2</sup> ; day 1) q3w or q4wx8 | 511   | T1–3, N0–1         | 4% Stage 0, 17% Stage I, 43% Stage IIA, 30% Stage IIB, 5% Stage IIIA, 1% Stage IIB<br><br>31% N0, 38% N1, 28% N2+, 3% unknown | 54% premenopausal, 3% peri-menopausal, 32% post-menopausal, 11% surgical; 59% ER+, 37% ER-, 4% unknown; 58% PR+, 37% PR-, 6% unknown | Tamoxifen for 5 y if aged ≥ 50 y and ER+; RT after BCS, PMRT at discretion of physician                         | Median follow-up 124 mo, no difference in locoregional recurrence or death rates:<br>OS at 10 y: 78.4% in FAC arm vs 81.7% in P→ FAC, p=0.930<br>No difference in OS between subgroups (BCT, mastectomy, PMRT, N+)                                                                                                                                                                                                                                                                                                                                                                                                                                                                |

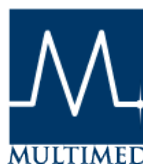

| Author, year                                                                   | Trial name, enrolment period | Intervention                                                                                                                                                                                                                                                                                                                                                                 | # pts | Inclusion criteria                                | Staging                                            | Other characteristics*                                    | Other                                                                                         | Results                                                                                                                                                                                                                                                                                                                                                                                                                                                                                                                          |
|--------------------------------------------------------------------------------|------------------------------|------------------------------------------------------------------------------------------------------------------------------------------------------------------------------------------------------------------------------------------------------------------------------------------------------------------------------------------------------------------------------|-------|---------------------------------------------------|----------------------------------------------------|-----------------------------------------------------------|-----------------------------------------------------------------------------------------------|----------------------------------------------------------------------------------------------------------------------------------------------------------------------------------------------------------------------------------------------------------------------------------------------------------------------------------------------------------------------------------------------------------------------------------------------------------------------------------------------------------------------------------|
| <b>Taxane + anthracycline (concurrent) vs more non-taxane ( anthracycline)</b> |                              |                                                                                                                                                                                                                                                                                                                                                                              |       |                                                   |                                                    |                                                           |                                                                                               |                                                                                                                                                                                                                                                                                                                                                                                                                                                                                                                                  |
| Martin, <sup>80</sup><br>2005                                                  | BCIRG 001<br><br>1997-1999   | TAC vs FAC<br><br>TAC: A (50 mg/m <sup>2</sup> ) + C (500 mg/m <sup>2</sup> ) + T (75 mg/m <sup>2</sup> ) q3wx6<br><br>FAC: A (50 mg/m <sup>2</sup> ) + F (500 mg/m <sup>2</sup> ) + C (500 mg/m <sup>2</sup> ) q3wx6<br><br>Primary prophylaxis with GCSF not allowed; pts with one episode of febrile neutropenia or infection were administered GCSF in subsequent cycles | 1491  | N+, T1-3; exclude advanced disease (T4, N2-3, M1) | 62% N1<br>38% N2+<br><br>41% T1<br>52% T2<br>7% T3 | 55% premenopausal<br>76% HR+<br>22% HER2+,<br>15% unknown | Tamoxifen for 5 y administered if HR+; RT after BCS, PMRT according to institution guidelines | Median follow-up 55 mo; estimated 5-y survival rates<br><br>DFS: 75% TAC vs 68% FAC, p=0.001<br>OS: 87% TAC vs 81% FAC, p=0.008<br>Grade 3 or 4 neutropenia 65.5% vs 49.3 % (p<0.001), febrile neutropenia 24.7% vs 2.5% (p<0.001), infections 3.9% vs 2.2% (p=0.05)                                                                                                                                                                                                                                                             |
| Mackey, <sup>81</sup><br>2013                                                  | BCIRG 001                    | See previous entry in table                                                                                                                                                                                                                                                                                                                                                  | 1491  |                                                   |                                                    |                                                           |                                                                                               | Median follow-up 124 mo<br><ul style="list-style-type: none"> <li>•DFS: 62% TAC vs 55% FAC, HR=0.80 (95% CI 0.68-0.93), p=0.0043</li> <li>•OS (10 y): 76% TAC vs 69% FAC, HR=0.74 (95% CI 0.61-0.90), p=0.0020</li> <li>•TAC improved DFS irrespective of nodal, hormone receptor, HER2 status (although not all statistically significant)</li> <li>•More serious adverse events during treatment phase with TAC than FAC (36% vs 9%); more sensory neuropathy during follow-up in TAC group (4% vs 1%, p&lt;0.0001)</li> </ul> |
| Hugh, <sup>82</sup><br>2009                                                    | BCIRG 001                    | See previous entry in table <sup>80</sup><br>Subtypes and response to docetaxel:<br>14.5% Triple negative<br>8.5% HER2 (HER2+, ER-, PR-)<br>61.1% luminal B (ER+                                                                                                                                                                                                             | 1350  |                                                   |                                                    |                                                           |                                                                                               | 3-y DFS (p values compared with luminal B) were 67% TN (p<0.001, HR=2.22), 68% HER2(p=0.0008, HR=2.12), 82% (referent luminal B), 91% luminal A (p=0.0027, HR=0.46)<br>Improved 3-y DFS with TAC was found in the luminal B group (p=0.025) and a                                                                                                                                                                                                                                                                                |



| Author, year                 | Trial name, enrolment period | Intervention                                                                                                                                                                                                                                                                                                                                                                                                                                                                          | # pts | Inclusion criteria                                                                                                              | Staging                   | Other characteristics*                   | Other                                                                                 | Results                                                                                                                                                                                                                                                                                                                                                                                                                                                                                                                                                                       |
|------------------------------|------------------------------|---------------------------------------------------------------------------------------------------------------------------------------------------------------------------------------------------------------------------------------------------------------------------------------------------------------------------------------------------------------------------------------------------------------------------------------------------------------------------------------|-------|---------------------------------------------------------------------------------------------------------------------------------|---------------------------|------------------------------------------|---------------------------------------------------------------------------------------|-------------------------------------------------------------------------------------------------------------------------------------------------------------------------------------------------------------------------------------------------------------------------------------------------------------------------------------------------------------------------------------------------------------------------------------------------------------------------------------------------------------------------------------------------------------------------------|
|                              |                              | and/or PR+ and either HER2+ and/or Ki-67 <sup>high</sup><br>15.9% luminal A (ER+ and/or PR+ and not HER2+ or Ki-67 <sup>high</sup> )                                                                                                                                                                                                                                                                                                                                                  |       |                                                                                                                                 |                           |                                          |                                                                                       | combined ER+/HER- group treated with tamoxifen (p=0.041), with a marginal trend in the triple negatives (p=0.051) and HER2 (p=0.068) subtypes.<br>No DFS advantage was found in the luminal A population.                                                                                                                                                                                                                                                                                                                                                                     |
| Dumontet, 2010 <sup>83</sup> | BCIRG 001                    | See previous entry in table <sup>80</sup><br>IHC assessment of biological markers                                                                                                                                                                                                                                                                                                                                                                                                     | 1350  |                                                                                                                                 |                           |                                          |                                                                                       | No interaction with Ki-67 and treatment allocation<br>Ki-67 and p53 protein, as well as microtubule-related parameters tau protein and tubulin III are independent prognostic factors but not predictive of docetaxel benefit                                                                                                                                                                                                                                                                                                                                                 |
| Francis, 2008 <sup>54</sup>  | BIG 02-98<br>1998-2001       | See previously in this table (Taxane + anthracycline [sequential] vs more non-taxane [anthracycline] regimen)                                                                                                                                                                                                                                                                                                                                                                         |       |                                                                                                                                 |                           |                                          |                                                                                       |                                                                                                                                                                                                                                                                                                                                                                                                                                                                                                                                                                               |
| Martin, 2010 <sup>84</sup>   | GEICAM 9805<br>1999-2003     | TAC vs FAC<br>TAC: T (75 mg/m <sup>2</sup> ) + A (50 mg/m <sup>2</sup> ) +C (500 mg/m <sup>2</sup> ) q3wx6<br>FAC: F (500 mg/m <sup>2</sup> ) + A (50 mg/m <sup>2</sup> ) +C (500 mg/m <sup>2</sup> ) q3wx6<br>Primary prophylaxis with GCSF not permitted in original protocol, amended after 230 pts due to incidence of neutropenic fever in >25% of TAC group; all TAC pts then received GCSF; in FAC group received prophylactic antibiotics and GCSF in all remaining cycles if | 1060  | N0 (≥10 nodes examined), T1-3, and at least one St Gallen risk factor (T2+, ER- and PR-, histological grade 2 or 3, age <35 y ) | 51% T1<br>47% T2<br>2% T3 | 53% premenopausal<br>65% HR+,<br>35% HR- | Tamoxifen for 5 y if HR+; RT if BCS, PMRT if >5cm depending on institution guidelines | Median follow-up 77 mo<br>DFS: 87.8% TAC vs 81.8% FAC (32% reduction), HR=0.68 (95% CI 0.49-0.93), p=0.01<br>Benefit in subgroups (HR status, menopausal status, age, tumour size, grade) suggested benefit of TAC vs FAC is consistent with benefit in overall population<br>OS: 92.5% TAC vs 93.5% FAC, HR=0.76 (95% CI 0.45-1.26), not significant, but small number of events (need longer follow-up)<br>Grade 3 and 4 adverse events 28.2% for TAC and 17% for FAC (p<0.001); most TAC-induced adverse effects ameliorated with GCSF administered as primary prophylaxis |



| Author, year                              | Trial name, enrolment period | Intervention                                                                                                                                                                                                                                                | # pts | Inclusion criteria                                    | Staging                                                 | Other characteristics*                                                                         | Other                                                                                                                       | Results                                                                                                                                                                                                                                                                                       |
|-------------------------------------------|------------------------------|-------------------------------------------------------------------------------------------------------------------------------------------------------------------------------------------------------------------------------------------------------------|-------|-------------------------------------------------------|---------------------------------------------------------|------------------------------------------------------------------------------------------------|-----------------------------------------------------------------------------------------------------------------------------|-----------------------------------------------------------------------------------------------------------------------------------------------------------------------------------------------------------------------------------------------------------------------------------------------|
|                                           |                              | episode of febrile neutropenia or infection                                                                                                                                                                                                                 |       |                                                       |                                                         |                                                                                                |                                                                                                                             |                                                                                                                                                                                                                                                                                               |
| Goldstein, 2008 <sup>85</sup>             | E2197<br>NCT00003519         | AT vs AC<br><br>AT: A (60 mg/m <sup>2</sup> ) + T (60 mg/m <sup>2</sup> ) q3wx4<br><br>AC: A (60 mg/m <sup>2</sup> ) + C (600 mg/m <sup>2</sup> ) q3wx4<br><br>Primary GCSF not used, received in pts with febrile neutropenia according to ASCO guidelines | 2882  | N1 or N0 with tumour >1 cm (at least 6 nodes removed) | 66% N0<br>34% N1<br><br>43% T1<br>57% T2+ (75% ≤2.8 cm) | 48% premenopausal or peri-menopausal<br><br>32% ER-PR-<br>3%ER-PR+<br>11% ER+PR-<br>54% ER+PR+ | Tamoxifen for 5 y if HR+; after June 2005 could switch to AI if post-menopausal; RT after BCS, PMRT at physician discretion | Median follow-up of 79.5 mo, 5-y survival rates reported<br><br>DFS: 85% both arms, HR=1.02 (95% CI 0.86-1.22), p=0.78 for AC vs AT<br>OS: 91% vs 92%<br><br>AT did not improve survival rate and was associated with more adverse effects                                                    |
| Sparano, 2012 <sup>86</sup><br>[abstract] | E2197<br><br>1998-2000       | See previous entry in table                                                                                                                                                                                                                                 | 2883  |                                                       | Median T size 2.0 cm                                    |                                                                                                |                                                                                                                             | Median follow-up 11.5 y, 10-y DFS, AC vs AT (HR >1 favours AT)<br>Overall: HR=1.02 (95% CI 0.88-1.18), p=0.83<br>ER+: HR=0.91 (95% CI 0.76-1.10), p=0.34<br>ER-: HR=1.22 (95% CI 0.96-1.56), p=0.11<br>OS: HR=1.03 (95% CI 0.86-1.23), p=0.73<br>Still no significant difference in DFS or OS |
| Brain, 2009 <sup>87</sup><br>[abstract]   | RAPP-01<br>1999-2003         | AT vs AC<br><br>AT: A (50 mg/m <sup>2</sup> ) + T (75 mg/m <sup>2</sup> ) q3wx4<br><br>AC: A (60 mg/m <sup>2</sup> ) + C (600 mg/m <sup>2</sup> ) q3wx4<br><br>No prophylactic GCSF                                                                         | 627   | Early, high-risk pN0 or limited pN+ (N1)              | 43% pN0                                                 | 44% Ki-67 ≥25%                                                                                 | RT according to standard guidelines, endocrine treatment for 5 y if HR+                                                     | Closed prematurely for adverse effects in 2003<br><br>Median follow-up 64 mo<br>5-y TTR 91% AT vs 90.9% AC, HR=0.91 (95% CI 0.54-1.52), p=0.71<br>OS: 94.9 vs 94.3%                                                                                                                           |
| Del Mastro, 2008 <sup>88</sup>            | GONO-MIG-5<br>1996-2001      | FEC <sub>21</sub> vs EP<br><br>FEC: F (600 mg/m <sup>2</sup> ) + E (60 mg/m <sup>2</sup> )                                                                                                                                                                  | 1055  | N+ (N1-2), operable                                   | 68% N1                                                  | 22% HR-<br>69% HR+                                                                             | Tamoxifen (20mg/d) for 5 y if HR+                                                                                           | FEC vs EP: more nausea/vomiting (85% vs 76%, p=0.0001), mucositis (46% vs 37%, p=0.003), leukopenia (52% vs 40%,                                                                                                                                                                              |





| Author, year                                                 | Trial name, enrolment period | Intervention                                                                                                                                                                                                                                                                                     | # pts | Inclusion criteria | Staging           | Other characteristics*                                       | Other                                                                                                                                                                       | Results                                                                                                                                                                                                                                                                                                                                                                                                                                                      |
|--------------------------------------------------------------|------------------------------|--------------------------------------------------------------------------------------------------------------------------------------------------------------------------------------------------------------------------------------------------------------------------------------------------|-------|--------------------|-------------------|--------------------------------------------------------------|-----------------------------------------------------------------------------------------------------------------------------------------------------------------------------|--------------------------------------------------------------------------------------------------------------------------------------------------------------------------------------------------------------------------------------------------------------------------------------------------------------------------------------------------------------------------------------------------------------------------------------------------------------|
| [abstract]                                                   |                              | + C (600 mg/m <sup>2</sup> ) q3wx6<br><br>EP: E (90 mg/m <sup>2</sup> ) + P (175 mg/m <sup>2</sup> ) q3wx4                                                                                                                                                                                       |       |                    |                   |                                                              |                                                                                                                                                                             | p=0.0002; less anemia (17% vs 25%, p=0.006), fever (7% vs 15%, p=0.0001), myalgia (1% vs 19%, p=0.0001), neurotoxicity (6% vs 38%, p<0.0001), allergic reaction (1% vs 5%, p=0.03)<br>Median follow-up 8.2 y<br>EFS (5 y): 71% FEC vs 70% EP<br>EFS (10 y): 46% both arms<br>OS (5 y): 89% vs 88%<br>OS (10 y): 72% vs 76%, p=0.8<br>Conclude different adverse effects profiles, no difference in survival rate                                             |
| Roché, 2009 <sup>89</sup><br>[abstract]                      | PACS04<br>2001–2004          | FEC vs ET<br><br>FEC: F (500 mg/m <sup>2</sup> ) + E (100 mg/m <sup>2</sup> ) + C (500 mg/m <sup>2</sup> ) q3wx6<br><br>ET: E (75 mg/m <sup>2</sup> ) + T (75 mg/m <sup>2</sup> ) q3wx6<br><br>GCSF mandatory for subsequent cycles after febrile neutropenia or treatment delay for neutropenia | 3010  | N+                 | 67% N1<br>49% T2+ | 48% post-menopausal<br>62% ER+PR+<br>20% ER-PR-<br>19% HER2+ | RT after BCS; tamoxifen for 5 y if HR+, protocol amendments allowed sequential use of AIs; HER2+ secondarily randomized to 1 y trastuzumab or observation (see HER2+ table) | FEC vs ET adverse effects: febrile neutropenia 2% vs 6.4% of cycles, grade 3–4 neutropenia 34% vs 9%, leucopenia 35% vs 47%, thrombopenia 1.7% vs 0.3%, nausea/vomiting 14% vs 8%<br>Median follow-up 59.3 mo; report 5–y survival rates<br>DFS: 79.7% FEC vs 81.7% ET, HR=0.89 (95% CI 0.76–1.05), p=0.18<br>Positive interaction was found and favoured ET for the HER2+ subgroup, p=0.01<br>OS: 90.3% FEC vs 90.1% ET, HR=1.07 (95% CI 0.85–1.35), p=0.54 |
| Gianni, 2009 <sup>90</sup> ;<br>Zambetti, 2013 <sup>91</sup> | ECTO<br>1996–2002            | See neoadjuvant section later in this table                                                                                                                                                                                                                                                      |       |                    |                   |                                                              |                                                                                                                                                                             |                                                                                                                                                                                                                                                                                                                                                                                                                                                              |



| Author, year                                          | Trial name, enrolment period                     | Intervention                                                                                                                                                                                                                                                                     | # pts                | Inclusion criteria                    | Staging                     | Other characteristics*               | Other                                                                                                                            | Results                                                                                                                                                                                                                                                                                                                                                                                                                                                                                                                                                                                                       |
|-------------------------------------------------------|--------------------------------------------------|----------------------------------------------------------------------------------------------------------------------------------------------------------------------------------------------------------------------------------------------------------------------------------|----------------------|---------------------------------------|-----------------------------|--------------------------------------|----------------------------------------------------------------------------------------------------------------------------------|---------------------------------------------------------------------------------------------------------------------------------------------------------------------------------------------------------------------------------------------------------------------------------------------------------------------------------------------------------------------------------------------------------------------------------------------------------------------------------------------------------------------------------------------------------------------------------------------------------------|
| <b>Taxane without anthracycline in one allocation</b> |                                                  |                                                                                                                                                                                                                                                                                  |                      |                                       |                             |                                      |                                                                                                                                  |                                                                                                                                                                                                                                                                                                                                                                                                                                                                                                                                                                                                               |
| Jones, 2009 <sup>92</sup>                             | US Oncology Research Trial 9735<br><br>1997-2000 | AC vs TC<br><br>AC: A (60 mg/m <sup>2</sup> ) + C (600 mg/m <sup>2</sup> ) q3w×4<br><br>TC: T (75 mg/m <sup>2</sup> ) + C (600 mg/m <sup>2</sup> ) q3w×4<br><br>Did not use prophylactic GCSF                                                                                    | 1016                 | Stage I-III, 1-7 cm,                  | 48% N0<br>42% N1<br>10% N2+ | 69% HR+<br>31% HR-                   | Tamoxifen for 5 y if HR+;<br>RT after BCS, PMRT if N2+;<br>HER2 status determined in 170 pts<br>(emphasis on those who relapsed) | Median follow-up 7 y, 7-y survival rate results<br>DFS: 81% TC vs 75% AC, HR=0.74 (95% CI 0.56-0.98), p=0.033<br>OS: 87% TC vs 82% AC, HR=0.69 (95% CI 0.50-0.97), p=0.032<br>TC was favoured in all subgroups: age, HER2 status, ER<br>Grade 3 and 4 adverse events: more anemia and febrile neutropenia in older pts and more febrile neutropenia with TC than AC; 3 late deaths in AC group probably related to treatment                                                                                                                                                                                  |
| Shulman 2014, <sup>93,94</sup><br>2012                | CALGB 40101<br><br>2002-2010                     | P vs AC<br><br>P: 80 mg/m <sup>2</sup> q1wx12 or 18 (N=287) or 175 mg/m <sup>2</sup> q2wx4 or 6(N=1653);<br><br>AC; 60/600 mg/m <sup>2</sup><br>Randomized to 4 or 6 cycles (N=284 q3w, N=1647 q2w)<br>Test of non-inferiority of T to AC (one-sided 95% CI of HR <1.30 for RFS) | 3871 (4646 planned ) | 0-3 positive axillary nodes; operable | 90% N0<br>65% T1<br>35% T2+ | 40% premenopausal , 68% HR+84% HER2- |                                                                                                                                  | Median follow-up 6.1 y<br>RFS: HR=1.26 (1-05-1.53) favouring AC<br>OS: HR=1.27 (1.00-1.62) favouring AC<br><br>5-y RFS 88% P vs 91% AC<br>5-y OS 94% P vs 95% AC<br>OS, in table: 92% vs 94%<br>The trial did not show non-inferiority of single agent P compared with AC<br><br>Grade 3+ adverse effects (hemoglobin, neutropenia, vomiting, fatigue) higher with AC; neuropathy higher in P arm<br><br>At median 5.3 y, 4-y RFS 90.9% vs 91.8% for 6 and 4 cycles, HR=1.03 (95% CI 0.84-1.28, p=0.77); OS 95.3% vs 96.3%, HR=1.12 (95% CI 0.84-1.49), p=0.44<br>Concluded 6 cycles not better than 4 cycles |



| Author, year                                                                                   | Trial name, enrolment period      | Intervention                                                                                                                                                                                                                                                                                                                                                                                         | # pts                   | Inclusion criteria                                                      | Staging                                                                                           | Other characteristics*           | Other                                                                                                                                                  | Results                                                                                                                                                                                                                                                                                                                                                                                                                                                                                                                                                       |
|------------------------------------------------------------------------------------------------|-----------------------------------|------------------------------------------------------------------------------------------------------------------------------------------------------------------------------------------------------------------------------------------------------------------------------------------------------------------------------------------------------------------------------------------------------|-------------------------|-------------------------------------------------------------------------|---------------------------------------------------------------------------------------------------|----------------------------------|--------------------------------------------------------------------------------------------------------------------------------------------------------|---------------------------------------------------------------------------------------------------------------------------------------------------------------------------------------------------------------------------------------------------------------------------------------------------------------------------------------------------------------------------------------------------------------------------------------------------------------------------------------------------------------------------------------------------------------|
| Nitz, <sup>95</sup><br>2011                                                                    | WSG Plan B<br>2009-2011<br>+      | TCx6 vs 4ECx4 -TCx4<br><br>Pts with HR+ N0-3 and RS11 receive endocrine therapy only (not included in randomization)                                                                                                                                                                                                                                                                                 | 2296,<br>ongoing        | HER2-; N+ or high-risk N0 (pT2, HR-, G2-3, age 35 y, or high uPa/PAI-1) |                                                                                                   |                                  |                                                                                                                                                        | Ongoing                                                                                                                                                                                                                                                                                                                                                                                                                                                                                                                                                       |
| Ortmann,<br>2011 <sup>96</sup>                                                                 | SUCCESS-C                         | FECx3→ Tx3 vs TCx6                                                                                                                                                                                                                                                                                                                                                                                   | 1452,<br>Target<br>3547 | HER2-                                                                   |                                                                                                   |                                  |                                                                                                                                                        | Ongoing                                                                                                                                                                                                                                                                                                                                                                                                                                                                                                                                                       |
| Nitz, <sup>66</sup><br>2009<br>[abstract]                                                      | WSG/AGO AM02                      | See previously in this table <sup>66-69</sup>                                                                                                                                                                                                                                                                                                                                                        |                         |                                                                         |                                                                                                   |                                  |                                                                                                                                                        |                                                                                                                                                                                                                                                                                                                                                                                                                                                                                                                                                               |
| Mansi, <sup>97</sup><br>2010                                                                   | Anglo-Celtic (ACCOG)<br>1999-2002 | See neoadjuvant section later in this table                                                                                                                                                                                                                                                                                                                                                          |                         |                                                                         |                                                                                                   |                                  |                                                                                                                                                        |                                                                                                                                                                                                                                                                                                                                                                                                                                                                                                                                                               |
| <b>Second-generation studies, taxane vs taxane (different dose or docetaxel vs paclitaxel)</b> |                                   |                                                                                                                                                                                                                                                                                                                                                                                                      |                         |                                                                         |                                                                                                   |                                  |                                                                                                                                                        |                                                                                                                                                                                                                                                                                                                                                                                                                                                                                                                                                               |
| Citron, <sup>63</sup><br>2003                                                                  | CALGB<br>9741<br><br>1997-1999    | I. A→ P→ C vs<br>II. dd A→ P→ C vs<br>III. AC→ P vs<br>IV. dd AC→ P<br><br>I. A→ P→ C: A (60 mg/m <sup>2</sup> ) q3wx4→ P (175 mg/m <sup>2</sup> IV over 3 hrs) q3wx4→ C (600 mg/m <sup>2</sup> IV) q3wx4 (33 w total)<br>II. As I but each cycle q2w (22 w total)<br>III. As I but C administered concurrently with A (total 21 w)<br>IV. As II but C administered concurrently with A (total 14 w) | 1973                    | T0-3, N1-2,<br>M0                                                       | 59% N1,<br>29% N2,<br>12% N3<br>(median 3 positive nodes)<br><br>40% T1,<br>58% T2+<br>2% unknown | 49% premenopausal<br><br>65% ER+ | 70% of female pts received tamoxifen; recommended that tamoxifen 20 mg/d be administered for 5 y to all HR+; pre-menopausal and to all post-menopausal | Median follow-up 36 mo<br>DFS: dd (q2w) vs q3w at 3 y: 85% vs 81%<br>RR=0.74, p=0.010<br>DFS, q2w vs q3 w at 4 y: 82% vs 75%,<br>p=0.0072<br>OS at 3 y, q2w vs q3w: 92% vs 90%, RR=0.69,<br>p=0.013<br>Treatment sequence (sequential A→ P→ C or concurrent AC→ P) was not significantly correlated with DFS (p=0.58) nor OS (p=0.48)<br>dd + filgrastim caused less grade 4 granulocytopenia, 3% and 9% for arms II and IV (q2w) vs 24% and 43% for arms 1 and 3 (q3 w)<br>Arm IV (AC→ T q2w) had higher rate of transfusions (13%) vs 0%, 3%, 4% on arms I, |



| Author, year                                    | Trial name, enrolment period | Intervention                                                                                                                                                                                                                                                                                                                                                                                           | # pts | Inclusion criteria                                          | Staging                                                                                                                  | Other characteristics*                                                                                                                           | Other                                                                                                                                        | Results                                                                                                                                                                                                                                                                                                                                                                                         |
|-------------------------------------------------|------------------------------|--------------------------------------------------------------------------------------------------------------------------------------------------------------------------------------------------------------------------------------------------------------------------------------------------------------------------------------------------------------------------------------------------------|-------|-------------------------------------------------------------|--------------------------------------------------------------------------------------------------------------------------|--------------------------------------------------------------------------------------------------------------------------------------------------|----------------------------------------------------------------------------------------------------------------------------------------------|-------------------------------------------------------------------------------------------------------------------------------------------------------------------------------------------------------------------------------------------------------------------------------------------------------------------------------------------------------------------------------------------------|
|                                                 |                              | Dose-dense (II and IV) received filgrastim days 3–10 of each cycle                                                                                                                                                                                                                                                                                                                                     |       |                                                             |                                                                                                                          |                                                                                                                                                  |                                                                                                                                              | II, III<br>Concurrent regimens had higher Grade 3+ emesis (7% vs 3%, p=0.0002), later cardiotoxicity (2% vs 1%, p=0.11), severe neurotoxicity (4% vs 2%, p=0.005)                                                                                                                                                                                                                               |
| Budd, 2013, 2011 <sup>37,38</sup><br>[abstract] | SWOG S0221<br><br>2003–2012  | dd AC→ P (80 mg/m <sup>2</sup> )q1wx12 vs dd AC→ P (175mg/m <sup>2</sup> )q2wx6<br><br>dd AC=AC (60/600 mg/m <sup>2</sup> ) q2wx6 + pegfilgrastim<br><br>Initially was initial AC vs ddAC randomization then P randomization but AC→P arms were discontinued for futility after 2716 pts and remaining pts received ddAC AC=A(24 mg/m <sup>2</sup> )q1wx15 + C(60mg/m <sup>2</sup> )daily + filgrastim | 3294  | N+ or high risk<br>N0; operable                             |                                                                                                                          |                                                                                                                                                  |                                                                                                                                              | Powered to find DFS HR≤0.82 for weekly vs q2 weekly for each factor<br>HR=1.08 (95% CI 0.90–1.28), p=0.42 and therefore excluding the hypothesis that HR=0.82<br><br>Estimated 5–y PFS 82% vs 81% for weekly P and ddP respectively                                                                                                                                                             |
| Loesch, 2010 <sup>98</sup>                      | 2000–2002                    | AC→ P vs AP→ P<br><br>AC (60/600 mg/m <sup>2</sup> )q3wx4→ P (175 mg/m <sup>2</sup> ) q3wx4<br><br>AP (50/200 mg/m <sup>2</sup> )q3wx4→ P (80mg/m <sup>2</sup> )q1wx12<br><br>No prophylactic hematopoietic growth factors permitted in cycle 1; use in subsequent cycles at physician's discretion                                                                                                    | 1830  | High risk:<br>N1–2 and T1–3, or N0 >2 cm or N0 >1cm and HR– | Stage I-III<br>6% Stage I<br>46% Stage IIA<br>35% Stage IIB<br>13% Stage IIIA<br><br>27% N0<br>46% N1<br>20% N2<br>8% N3 | 33% premenopausal<br>7% peri-menopausal<br>57% post-menopausal<br><br>52% ER+PR+<br>10% ER+PR–<br>2% ER–PR+<br>35% ER–PR– (HR–)<br><br>33% HER2+ | Premenopausal HR+ received 2–3 y tamoxifen (later increased to 5 y), Post-menopausal pts received 2–3 y tamoxifen which could be followed by | Median follow-up 64 mo, report 6–y survival rates (median survival not yet reached), no significant difference<br>DFS: 79% vs 80%, OS: 82% vs 87%, p=0.08<br><br>Unplanned subgroup analysis for OS: HR– and TN groups favoured arm 2 (p=0.06 and p=0.07)<br><br>Both regimens equally effective and tolerable<br><br>Dose-dense P (arm 2) is as effective, but increased peripheral neuropathy |



| Author, year               | Trial name, enrolment period              | Intervention                                                                                                                                                                                                                                                                                                                                                                                                                                                                                                                                                                                       | # pts | Inclusion criteria      | Staging                                                                                | Other characteristics*                  | Other                                                                                                                                                                        | Results                                                                                                                                                                                                                                                                                                                                                                                                                                                                                                                                                                                                                                                                                                                                                                                                                                                                                               |
|----------------------------|-------------------------------------------|----------------------------------------------------------------------------------------------------------------------------------------------------------------------------------------------------------------------------------------------------------------------------------------------------------------------------------------------------------------------------------------------------------------------------------------------------------------------------------------------------------------------------------------------------------------------------------------------------|-------|-------------------------|----------------------------------------------------------------------------------------|-----------------------------------------|------------------------------------------------------------------------------------------------------------------------------------------------------------------------------|-------------------------------------------------------------------------------------------------------------------------------------------------------------------------------------------------------------------------------------------------------------------------------------------------------------------------------------------------------------------------------------------------------------------------------------------------------------------------------------------------------------------------------------------------------------------------------------------------------------------------------------------------------------------------------------------------------------------------------------------------------------------------------------------------------------------------------------------------------------------------------------------------------|
|                            |                                           |                                                                                                                                                                                                                                                                                                                                                                                                                                                                                                                                                                                                    |       |                         |                                                                                        | 62% HER2-<br><br>21% TN                 | AI at physicians discretion;<br>RT after BCS, PMRT if N2+                                                                                                                    |                                                                                                                                                                                                                                                                                                                                                                                                                                                                                                                                                                                                                                                                                                                                                                                                                                                                                                       |
| Swain, 2010a <sup>99</sup> | NSABP B30<br>NCT00003782<br><br>1999-2004 | AC→ T vs AT vs ACT<br><br>AC→ T: A (60 mg/m <sup>2</sup> ) + C (600 mg/m <sup>2</sup> ) q3wx4→ T (100 mg/m <sup>2</sup> ) q3wx4<br><br>AT: A (60 mg/m <sup>2</sup> ) + T (60 mg/m <sup>2</sup> ) q3wx4<br><br>ACT: A (60 mg/m <sup>2</sup> ) + C (600 mg/m <sup>2</sup> ) + T (60 mg/m <sup>2</sup> ) q3wx4<br><br>Doses modified in Sept 2000 after 5 deaths were reported with ACT.<br>ACT: A 50 mg/m <sup>2</sup> , C 500 mg/m <sup>2</sup> , T 75 mg/m <sup>2</sup><br>AT: A 50 mg/m <sup>2</sup> , T 75 mg/m <sup>2</sup> ; added primary prophylaxis with GCSF in these two treatment groups | 5264  | pN+, cN0-1, early, T1-3 | 65% N1<br>25% N2<br>8% N3<br>3% unknown<br><br>42% ≤2cm(T1)<br>40% 2-4 cm<br>15% >4 cm | 45% pre- or peri-menopausal;<br>75% ER+ | HR+ received tamoxifen for 5 y, starting October 2002<br>anastrozole was allowed in post-menopausal pts<br><br><br><br><br><br>Pre-menopausal for menstrual history substudy | Median follow-up 73 mo, calculated 8-y survival rates<br><br>DFS: AC→ T 74% vs AT 69%, HR=0.80, p=0.001<br>DFS: AC→ T 74% vs ACT 69%, HR=0.83, p=0.01<br>OS: AC→ T 83% vs AT 79%, HR=0.83, p=0.03<br>OS: AC→ T 83% vs ACT 79%, HR=0.86, p=0.09<br>AT non-inferior to ACT for OS, HR=0.96 (95% CI 0.82-1.14)<br>No interaction between treatment effect and factors tested (age, hormone receptor status, nodes, tumour size, hormone therapy, menopausal status)<br>Increased incidence of grade 3 or 4 adverse events with AC→ T (65%) compared with AT (45%) or ACT (48%), including stomatitis, febrile neutropenia, infection, arthralgia, fatigue, and vomiting<br>Concluded AC→ T reduced mortality rates, and hypothesized that longer course and/or higher dose of T are important for maximum effect<br>Menstrual history substudy (N=2343): survival rate higher in pts with amenorrhea for |



| Author, year                   | Trial name, enrolment period                     | Intervention                                                                                                                                                                                                                                                                                                                        | # pts                | Inclusion criteria          | Staging | Other characteristics* | Other                                                                           | Results                                                                                                                                                                                                                                                                                                                                                                                                                                                                                                                                                                                                                                                                            |
|--------------------------------|--------------------------------------------------|-------------------------------------------------------------------------------------------------------------------------------------------------------------------------------------------------------------------------------------------------------------------------------------------------------------------------------------|----------------------|-----------------------------|---------|------------------------|---------------------------------------------------------------------------------|------------------------------------------------------------------------------------------------------------------------------------------------------------------------------------------------------------------------------------------------------------------------------------------------------------------------------------------------------------------------------------------------------------------------------------------------------------------------------------------------------------------------------------------------------------------------------------------------------------------------------------------------------------------------------------|
|                                |                                                  |                                                                                                                                                                                                                                                                                                                                     |                      |                             |         |                        |                                                                                 | ≥6 mo in the 24 mo after randomization: DFS RR=0.70, p<0.001, OS HR=0.76, p=0.04<br>No interaction for treatment, age, ER status                                                                                                                                                                                                                                                                                                                                                                                                                                                                                                                                                   |
| Swain, <sup>100</sup><br>2010b | NSABP B30<br>NCT00003782                         | See previous entry in table <sup>99</sup><br><br>Reanalysis of menstrual history (MH) substudy to report 12-m landmark analysis                                                                                                                                                                                                     | 1885                 |                             |         |                        |                                                                                 | 12-m landmark analysis among female pts with amenorrhea compared with rest<br>Significant improvement in DFS (HR=0.65, p<0.001) and OS (HR=0.72, p=0.04)<br>ER+ subgroup: DFS HR=0.51, p<0.001; OS HR=0.52, p=0.002<br>ER- subgroup: DFS HR=0.96, p=0.85; OS HR=1.08, p=0.76                                                                                                                                                                                                                                                                                                                                                                                                       |
| Ganz, <sup>101</sup><br>2011   | NSABP B30<br>NCT00003782<br><br>QoL<br>1999-2001 | See previous entry in table <sup>99</sup><br><br>N=2145 in menstrual history (MH) substudy<br><br>N=2111 in QoL substudy; calculated a trial outcome index (TOI) that summarizes physical and functional well-being scales and disease-specific items, 5- point difference is clinically meaningful, with a high score being better | 5351<br>(2145, 2111) | MH substudy: pre-menopausal |         |                        | MH substudy: 77% received tamoxifen<br><br>QoL substudy: 79% received tamoxifen | Rate of prolonged amenorrhea at 12 mo differs significantly by treatment group:<br>70% AC→ T, 38% AT, 58% TAC (p<0.001)<br>If exclude female pts with unknown status at 12 mo, 83% AC→ T, 47% AT, 67% TAC (p<0.001)<br>AC→ T had higher rate of prolonged amenorrhea to 12, 18, and 24 mo compared with AT; rates higher with tamoxifen<br>AT without tamoxifen had lowest rate of amenorrhea (20%-25% over the 24 mo of observation)<br>Information may be useful in younger female pts interested in preserving fertility, because AT may offer better chance of return of menses<br>QoL Outcomes:<br>Over 24 mo, AC→ T had TOI 2.4 points lower than TAC; AT had TOI 1.0 points |

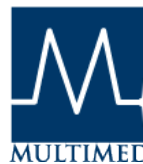

| Author, year                                                                | Trial name, enrolment period              | Intervention                                                                                                                                                                                                                                                                                                                                                                | # pts                              | Inclusion criteria                                        | Staging                                                         | Other characteristics*                       | Other                                                          | Results                                                                                                                                                                                                                                                                                                                                                                                                                                |
|-----------------------------------------------------------------------------|-------------------------------------------|-----------------------------------------------------------------------------------------------------------------------------------------------------------------------------------------------------------------------------------------------------------------------------------------------------------------------------------------------------------------------------|------------------------------------|-----------------------------------------------------------|-----------------------------------------------------------------|----------------------------------------------|----------------------------------------------------------------|----------------------------------------------------------------------------------------------------------------------------------------------------------------------------------------------------------------------------------------------------------------------------------------------------------------------------------------------------------------------------------------------------------------------------------------|
|                                                                             |                                           |                                                                                                                                                                                                                                                                                                                                                                             |                                    |                                                           |                                                                 |                                              |                                                                | lower than TAC; differences are statistically significant but not clinically meaningful<br>At 6 mo, AC→ T had TOI ≈ 10 points lower than TAC or AT<br>TAC and AT pts TOI and symptoms severity score returned to baseline at 6 mo, whereas AC→ T returned to baseline at 12 mo (p<0.001)                                                                                                                                               |
| Eiermann, 2011 <sup>102</sup>                                               | BCIRG 005<br>2000–2003                    | TACx6 vs ACx4→ Tx4<br><br>TAC: T (75 mg/m <sup>2</sup> ) + A (50 mg/m <sup>2</sup> ) + C (500 mg/m <sup>2</sup> ) q3wx6<br><br>AC→ T: A (60 mg/m <sup>2</sup> ) + C (600 mg/m <sup>2</sup> ) q3wx4→ T (100 mg/m <sup>2</sup> ) q3wx4<br><br>Primary prophylaxis with GCSF allowed; recommend for secondary prophylaxis after an episode of febrile neutropenia or infection | 3298                               | N+ (cN0–1 but pN+, ALND of at least 6 nodes), HER2–, T1–3 | 41% pT1<br>51% pT2<br>8% pT3<br><br>61% N1<br>28% N2,<br>11% N3 | 48% premenopausal<br>82% HR+                 | 96% received adjuvant tamoxifen and/or AIs;<br>66% received RT | TAC associated with more febrile neutropenia and thrombocytopenia, AC→ T associate with more sensory neuropathy, nail changes and myalgia; neutropenic infection similar in both groups<br><br>At median follow-up 65 mo, estimated 5–y DFS & OS<br>DFS 79% in both groups: HR=1.0 (95% CI 0.86–1.16), p=0.98<br>OS 88 and 89%: HR=0.91 (95% CI 0.75–1.11), p=0.37<br>Conclude equally effective but different adverse effects profile |
| Poole, 2008 <sup>103</sup><br>[abstract]<br><br>Wardley, 2008 <sup>23</sup> | tAnGo<br>2001–2004<br><br>safety substudy | EC→ PG vs EC→ P<br><br>EC→ PG : E (90 mg/m <sup>2</sup> IV) + C (600 mg/m <sup>2</sup> ) q3wx4→ P (175 mg/m <sup>2</sup> ) + G (1250 mg/m <sup>2</sup> days 1 & 8) q3wx4<br><br>EC→ P (details not reported, assumed to be same as above without G)                                                                                                                         | 3152<br><br>135 (safety sub-study) | Higher risk early                                         | 77% N+<br>61% T2+                                               | 41% ER–, 37% PR–, 26% HER2+ (of 909 assayed) |                                                                | Median follow-up 35 mo<br>DFS: HR=1.0 (95% CI 0.8–1.2), p=0.96<br>OS: HR=1.1 (95% CI 0.9–1.4), p=0.35<br>No subset where EC→ PG more effective, including by ER/PR status<br>Both regimens reported temporary reductions in pulmonary functions and transient transaminitis levels (not clinically significant); these were greater with EC→ PG but both well                                                                          |



| Author, year                 | Trial name, enrolment period | Intervention                                                                                                                                                                                                                                                                                                                                                                          | # pts | Inclusion criteria                        | Staging                                                                      | Other characteristics*                                                            | Other                                                                                                                                                                                                                        | Results                                                                                                                                                                                                                                                                                                                                                                                                                                                                                                                                                                                                                                                                                                                                                                                                                                                                                                                                                                                |
|------------------------------|------------------------------|---------------------------------------------------------------------------------------------------------------------------------------------------------------------------------------------------------------------------------------------------------------------------------------------------------------------------------------------------------------------------------------|-------|-------------------------------------------|------------------------------------------------------------------------------|-----------------------------------------------------------------------------------|------------------------------------------------------------------------------------------------------------------------------------------------------------------------------------------------------------------------------|----------------------------------------------------------------------------------------------------------------------------------------------------------------------------------------------------------------------------------------------------------------------------------------------------------------------------------------------------------------------------------------------------------------------------------------------------------------------------------------------------------------------------------------------------------------------------------------------------------------------------------------------------------------------------------------------------------------------------------------------------------------------------------------------------------------------------------------------------------------------------------------------------------------------------------------------------------------------------------------|
|                              |                              |                                                                                                                                                                                                                                                                                                                                                                                       |       |                                           |                                                                              |                                                                                   |                                                                                                                                                                                                                              | tolerated                                                                                                                                                                                                                                                                                                                                                                                                                                                                                                                                                                                                                                                                                                                                                                                                                                                                                                                                                                              |
| Joensuu, 2012 <sup>9</sup>   | FinXX NCT 0114816            | <p>TX→ CEX vs T→ CEF</p> <p>TX→ CEX: T (60 mg/m<sup>2</sup>) + X (900 mg/m<sup>2</sup>; days 1–15) q3w×3→ C (600 mg/m<sup>2</sup>) + E (75 mg/m<sup>2</sup>) + X (900 mg/m<sup>2</sup>; days 1–15) q3w×3</p> <p>T→ CEF: T (80 mg/m<sup>2</sup>) q3w×3→ C (600 mg/m<sup>2</sup>) + E (75 mg/m<sup>2</sup>) + F (600 mg/m<sup>2</sup>) q3w×3</p> <p>Prophylactic GCSF not scheduled</p> | 1500  | N+ or high risk<br>N0 (T2+ and PR-)       | <p>11% N0<br/>61% N1<br/>28% N2+</p> <p>44% pT1<br/>50% pT2<br/>6% pT3–4</p> | <p>44% pre-menopausal<br/>56% post-menopausal<br/>77% ER+, 62% PR+, 19% HER2+</p> | <p>HR+ received adjuvant endocrine therapy for 5 y,<br/>premenopausal received tamoxifen and post-menopausal anastrozole;<br/>RT according to institutions practice;<br/>amended May 2005 to allow trastuzumab for HER2+</p> | <p>Median follow-up 59 mo, calculated survival rates at 5 y, TX→CEX vs T→CEF</p> <p>DFS: 86.6% vs 84.1%, HR=0.78 (95% CI 0.59–1.03), p=0.08</p> <p>OS: 92.5% vs 89.9%, HR=0.73 (95% CI 0.52–1.04), p=0.080</p> <p>TX→CEX arm had significantly fewer local relapses (8 vs 20, HR=0.39, p=0.024), deaths from breast cancer (42 vs 64, HR=0.64, p=0.027), and better breast-cancer specific survival, HR=0.64, (95% CI 0.44–0.95) p=0.027)</p> <p>Exploratory subgroup analysis, TX→CEX vs T→CEF:</p> <p>RFS in N2 pts with N2 cancer (HR=0.64, 95% CI 0.43–0.96)</p> <p>RFS in pts with TN cancer (HR=0.48, 95% CI 0.26–0.88, p=0.018)</p> <p>TX/CEX was associated with more capecitabine-related adverse effects including stomatitis, hand-foot syndrome, nail changes, and diarrhea, whereas T/CEF was associated with more frequent neutropenia, febrile neutropenia, infection with neutropenia, myalgia, and amenorrhea, probably as a result of the higher docetaxel dose.</p> |
| Sparano, 2008 <sup>104</sup> | E1199, ECO 1199 NCT00004125  | <p>AC→ P (q1wx12) vs AC→ P (q3wx4) vs AC→ T (q1wx12) vs AC→ T (q3wx4)</p> <p>AC→ P: A (60 mg/m<sup>2</sup>) + C (600</p>                                                                                                                                                                                                                                                              | 4950  | N+ (N1–2), T1–3; or N0 and high risk T2–3 | <p>12% N0<br/>56% N1<br/>32% N2–3</p>                                        | <p>70% HR+, 26% HR–, 4% unknown;<br/>19% HER2+, 68% HER2–,</p>                    | <p>Tamoxifen for 5 y if HR+, modified June 2005 to allow switch to AI</p>                                                                                                                                                    | <p>No significant difference in DFS between combined groups with P vs those with T (HR=1.03, p=0.61) or between weekly vs every 3 w (HR=1.06, p=0.33)</p> <p>5–y survival rates: compared with</p>                                                                                                                                                                                                                                                                                                                                                                                                                                                                                                                                                                                                                                                                                                                                                                                     |





| Author, year                   | Trial name, enrolment period | Intervention                                                                                                                                                                                                                                                                                                                                                                                                                                                                                                  | # pts | Inclusion criteria | Staging | Other characteristics* | Other                                                                                  | Results                                                                                                                                                                                                                                                                                                                                                                                                                                                                                                                                                                                                                                                                                                                                                                                                                                                       |
|--------------------------------|------------------------------|---------------------------------------------------------------------------------------------------------------------------------------------------------------------------------------------------------------------------------------------------------------------------------------------------------------------------------------------------------------------------------------------------------------------------------------------------------------------------------------------------------------|-------|--------------------|---------|------------------------|----------------------------------------------------------------------------------------|---------------------------------------------------------------------------------------------------------------------------------------------------------------------------------------------------------------------------------------------------------------------------------------------------------------------------------------------------------------------------------------------------------------------------------------------------------------------------------------------------------------------------------------------------------------------------------------------------------------------------------------------------------------------------------------------------------------------------------------------------------------------------------------------------------------------------------------------------------------|
|                                | 1999–2002                    | <p>mg/m<sup>2</sup> q3wx4→ P (175 mg/m<sup>2</sup>) q3wx4</p> <p>AC→ P: AC as above→ P (80 mg/m<sup>2</sup>) q1wx12</p> <p>AC→ T: AC as above→ T (100 mg/m<sup>2</sup>) q3wx4</p> <p>AC→ T: AC as above→ T (35 mg/m<sup>2</sup>) q1wx12</p> <p>P q3 w is considered standard therapy</p> <p>Colony-stimulating factors administered at physician discretion according to ASCO guidelines for pts who had an episode of febrile neutropenia or persistent neutropenia that prevented treatment on schedule</p> |       |                    |         | 13% unknown            | during or after the 5–y course; RT after BCS, PMRT at discretion of treating physician | <p>standard therapy (P every 3 w, OS 77%), HR &gt;1 favours experimental therapy:</p> <p>P (weekly)</p> <p>DFS: HR=1.27 (1.03–1.57), p=0.006</p> <p>OS: HR=1.32 (1.02–1.72), p=0.01</p> <p>Grade 2–4 neuropathies more frequent with weekly P (27% vs 20%)</p> <p>T (every 3 w)</p> <p>DFS: HR=1.23 (1.00–1.52), p=0.02</p> <p>OS: HR=1.13 (95% CI 0.88–1.46), p=0.25</p> <p>T (weekly)</p> <p>DFS: HR=1.09 (95% CI 0.89–1.34), p=0.29</p> <p>OS: HR=1.02 (95% CI 0.80–1.32), p=0.80</p> <p>Interaction of T and weekly schedule (q1w or q3w) was significant</p> <p>In exploratory analysis, both HER2+ and HER2– subgroups did better on experimental treatment, but only significant for HER2– on weekly P (DFS, HR=1.33, p=0.009; OS, HR=1.34, p=0.03; not affected by hormone receptor status)</p> <p>Overall, weekly P after AC improved DFS and OS</p> |
| Schneider, 2012 <sup>105</sup> | E1199                        | See previous entry in table                                                                                                                                                                                                                                                                                                                                                                                                                                                                                   | 4554  |                    |         |                        |                                                                                        | <p>Median time to neuropathy after first dose of taxane was 3.0 mo (range 0–57 mo)</p> <p>Grade 2–4 neuropathy developed in 18%, 22%, 15%, 13% of pts in group P3 (P q3w), P1 (P q1w), D3 (T q3w), D1 (T q1w), respectively</p> <p>P1 vs P3, OR=1.34 (1.09–1.64), p=0.006</p>                                                                                                                                                                                                                                                                                                                                                                                                                                                                                                                                                                                 |



| Author, year                                            | Trial name, enrolment period | Intervention                                                                                                                                                                                                                                                                                                                                                                | # pts                       | Inclusion criteria                                          | Staging                                                                                                 | Other characteristics*                                          | Other                                                                  | Results                                                                                                                                                                                                                                                                                                                                                                                                                                                                                                                                                       |
|---------------------------------------------------------|------------------------------|-----------------------------------------------------------------------------------------------------------------------------------------------------------------------------------------------------------------------------------------------------------------------------------------------------------------------------------------------------------------------------|-----------------------------|-------------------------------------------------------------|---------------------------------------------------------------------------------------------------------|-----------------------------------------------------------------|------------------------------------------------------------------------|---------------------------------------------------------------------------------------------------------------------------------------------------------------------------------------------------------------------------------------------------------------------------------------------------------------------------------------------------------------------------------------------------------------------------------------------------------------------------------------------------------------------------------------------------------------|
|                                                         |                              |                                                                                                                                                                                                                                                                                                                                                                             |                             |                                                             |                                                                                                         |                                                                 |                                                                        | D1 vs P3 OR=0.73 (95% CI 0.58-0.92), p=0.008<br>D3 vs P3 OR=0.81 (95% CI 0.65-1.02), p=0.070                                                                                                                                                                                                                                                                                                                                                                                                                                                                  |
| Watanabe, 2009 <sup>106</sup><br><br>[abstract, poster] | N-SAS-BC02<br><br>2000-2006  | a) (AC or EC)→ P vs<br>b) (AC or EC)→ T vs<br>c) P vs<br>d) T<br><br>(AC or EC)→ P: A (60 mg/m <sup>2</sup> ) or E (75 mg/m <sup>2</sup> ) + C (600 mg/m <sup>2</sup> ) q3wx4→ P (175 mg/m <sup>2</sup> ) q3wx4<br><br>(AC or EC)→ T: (AC or EC) as above→ T (75 mg/m <sup>2</sup> ) q3wx4<br><br>P: P (175 mg/m <sup>2</sup> ) q3wx8<br>T: T (75 mg/m <sup>2</sup> ) q3wx8 | 1060                        | N+ (SLNB or ALND);<br>excluded<br>ER+PR+ until<br>June 2003 | 12% I<br>40% IIA<br>38% IIB<br>10% IIIA<br><br>64% <3 cm<br>36% ≥3 cm<br><br>58% N1<br>26% N2<br>16% N3 | 56% ER+<br>44% ER-<br>44% PR+<br>56% PR-                        | RT after BCS<br><br>HR+ : 20mg<br>TAM or an AI<br>for 5 y              | Trial to test non-inferiority for DFS, median follow-up 46.5 mo<br>DFS: HR=0.81(95% CI 0.64-1.03), p=0.08 for T vs P (b or d) vs (a or c)<br>DFS: HR=1.26 (95% CI 0.99-1.60), p=0.67 for (taxane, c or d) vs (AC-taxane, a or b)<br>HER2+: DFS HR1.85 (1.11-3.07), p=0.017<br>HER2-: 1.11 (95% CI 0.85-1.46), p=0.44<br>Grade 3-4 adverse effects lowest in P arm<br>Neutropenic fever more frequent with T than P<br>Conclude DFS better with T than P<br>AC improves DFS in subset with HER2+ but not HER2-<br>Severe adverse effects greater with T than P |
| Shiroiwa, 2011 <sup>107</sup>                           | N-SAS BC02<br><br>2001-2003  | See previous entry in table                                                                                                                                                                                                                                                                                                                                                 | 299<br>QoL<br>sub-<br>study | N+, Stage I-<br>IIIA, excluded<br>ER+PR+                    | 55% N1<br>27% N2<br>18% N3<br>56% <3 cm<br>44% ≥3 cm                                                    | 25% HER2+<br>44% HER2-<br>34% unknown<br><br>39% HR+<br>61% HR- | Utility scores for health-related QoL, range 0-1 (1 is perfect health) | <ul style="list-style-type: none"> <li>Utility scores significantly lower with T alone (group d) than AC (groups a and b)</li> <li>AC-taxane had significantly higher utility score than taxane alone</li> <li>No difference between T (b or d) vs P (a or c)</li> </ul>                                                                                                                                                                                                                                                                                      |
| Shimozuma 2012 <sup>108</sup>                           | N-SAS BC02                   | See previous entry in table<br>Study of chemotherapy-induced peripheral neuropathy (CIPN) and health-related QoL (HRQoL) assessment in first 300 pts                                                                                                                                                                                                                        |                             |                                                             |                                                                                                         |                                                                 |                                                                        | Author conclusions inconsistent with data, wide variation at baseline and inconsistency between groups, measured at end of cycle 6 but not cycle 8 (last cycle) so cumulative effect unknown; tests appear not sensitive enough to distinguish group                                                                                                                                                                                                                                                                                                          |



| Author, year                                                    | Trial name, enrolment period | Intervention                                                                                                                                                                                                                                                                                                                                                                                                                                    | # pts | Inclusion criteria                                                     | Staging | Other characteristics*         | Other                                                            | Results                                                                                                                                                                                                                                                                                                                                                                                                                                                                                                                                                                                                                                                                                                                                  |
|-----------------------------------------------------------------|------------------------------|-------------------------------------------------------------------------------------------------------------------------------------------------------------------------------------------------------------------------------------------------------------------------------------------------------------------------------------------------------------------------------------------------------------------------------------------------|-------|------------------------------------------------------------------------|---------|--------------------------------|------------------------------------------------------------------|------------------------------------------------------------------------------------------------------------------------------------------------------------------------------------------------------------------------------------------------------------------------------------------------------------------------------------------------------------------------------------------------------------------------------------------------------------------------------------------------------------------------------------------------------------------------------------------------------------------------------------------------------------------------------------------------------------------------------------------|
|                                                                 |                              |                                                                                                                                                                                                                                                                                                                                                                                                                                                 |       |                                                                        |         |                                |                                                                  | differences                                                                                                                                                                                                                                                                                                                                                                                                                                                                                                                                                                                                                                                                                                                              |
| Swain, 2012, 2013 109,110                                       | NSABP B-38 2004-2007         | dd AC→ PG vs dd AC→ P vs TAC<br><br>AC→ PG: A (60 mg/m <sup>2</sup> ) + C (600 mg/m <sup>2</sup> ) q2wx4→ P (175 mg/m <sup>2</sup> ) + G (2000 mg/m <sup>2</sup> ) q2wx4<br><br>AC→ P: AC as above→ P (175 mg/m <sup>2</sup> ) q2wx4<br><br>TAC: T (75 mg/m <sup>2</sup> ) + A (50 mg/m <sup>2</sup> ) + C (500 mg/m <sup>2</sup> ) q3wx6<br><br>Primary GCSF required; erythropoiesis-stimulating agents (ESA) used at investigator discretion | 4894  | Operable, N+                                                           | 65% N1  | 52% post-menopausal<br>80% HR+ |                                                                  | Median follow-up 64 mo, reported 5-y survival rates<br>DFS: 80.6% AC→ PG vs 82.2% AC→ P (HR=1.1, p=0.27) and 80.1% TAC (HR=0.97, p=0.71)<br>DFS: AC→ P vs TAC, HR=0.89, p=0.14<br>OS: 90.8% AC→ PG vs 89.1% AC→ P (HR=0.89, p=0.25) and 89.6% TAC (HR=0.90, p=0.32)<br>OS: AC→ P vs TAC, HR=1.01, p=0.92<br>Adverse effects for TAC, AC→ P, AC→ PG respectively: febrile neutropenia (grade 3-4, 8%, 2%, 2%, p<0.001); sensory neuropathy (grades 3-4, <1%, 7%, 6%, p<0.001), diarrhea (grade 3-4, Hgb <10 in 12%, 26%, 33% with ESA use in 35.2%, 46%, 51.6% and transfusions in 3.7%, 6.3%, 9.4%; death on treatment (N=13, 5, 7, p=0.2)<br>Conclude no significant differences in efficacy although adverse effects profiles differed |
| Pippen, 2011 <sup>15</sup><br>O'Shaughnessy, 2010 <sup>16</sup> | US Oncology 1062 USON 01062  | AC→ T vs AC→ TX<br><br>AC→ T: A (60 mg/m <sup>2</sup> ) + C (600 mg/m <sup>2</sup> ) q3wx4→ T (100 mg/m <sup>2</sup> ) q3wx4                                                                                                                                                                                                                                                                                                                    | 2611  | Resectable, early, high risk (N+, T1-3; or N0, T2+; or N0, >1 cm, HR-) |         |                                | Tamoxifen or AI for 5 y if HR+;<br>After 2005, HER2+ offered 1 y | Median follow-up of 5 y, 304 events<br>DFS: HR=0.84 (95% CI 0.67-1.05), p=0.125 [endpoint not met]<br>Distant DFS favoured TX group: HR=0.80 (95% CI 0.63-1.02), p=0.067<br>OS: improvement with TX vs T:                                                                                                                                                                                                                                                                                                                                                                                                                                                                                                                                |



| Author, year                                                                 | Trial name, enrolment period | Intervention                                                                                                                                                                                                                                                                         | # pts | Inclusion criteria                                       | Staging                                           | Other characteristics*                                                                 | Other                                                                                                                               | Results                                                                                                                                                                                                                                                                                                                                                                                                                                                                                                                               |
|------------------------------------------------------------------------------|------------------------------|--------------------------------------------------------------------------------------------------------------------------------------------------------------------------------------------------------------------------------------------------------------------------------------|-------|----------------------------------------------------------|---------------------------------------------------|----------------------------------------------------------------------------------------|-------------------------------------------------------------------------------------------------------------------------------------|---------------------------------------------------------------------------------------------------------------------------------------------------------------------------------------------------------------------------------------------------------------------------------------------------------------------------------------------------------------------------------------------------------------------------------------------------------------------------------------------------------------------------------------|
| [abstracts]                                                                  | 2002–2006                    | AC→ TX: AC as above→ TX<br>(T: 75 mg/m <sup>2</sup> day 1, X: 825 mg/m <sup>2</sup> bid, days 1–14) [ number of cycles not reported]                                                                                                                                                 |       |                                                          |                                                   |                                                                                        | trastuzumab                                                                                                                         | HR=0.68 (95% CI 0.51–0.92), p=0.011<br>Subgroup analysis appeared to favour TX over T<br>Unplanned subset analysis of Ki-67 expression and DFS suggests benefit of X in more highly proliferative tumours ( for Ki-67 >10%, hazard ratio for TX vs T is HR=0.70 (95% CI 0.50–0.98) for DFS and HR=0.52 (95% CI 0.33–0.82) for OS<br>Adverse events similar in both arms, except grade 3 hand-foot syndrome (3.8% T vs 18.1% TX), grade 3/4 stomatitis (4.5% vs 9.1%), diarrhea (2.9% vs 5.1%) and febrile neutropenia (13.1% vs 9.4%) |
| O'Shaughnessy, 2012 <sup>17</sup><br>[abstract]                              | USON 01062                   | See previous entry in table                                                                                                                                                                                                                                                          |       |                                                          |                                                   | 2195 ductal<br>355 lobular or mixed                                                    |                                                                                                                                     | Exploratory analysis by histology:<br>•Ductal pts AC→ T vs AC→ XT:<br>•No difference in DFS (HR=0.92, p=0.48) or OS (HR=0.75, p=0.07)<br>•Lobular/mixed AC→ XT vs AC→ T<br>•DFS, HR=0.55, p=0.055<br>•OS, HR=0.38, p=0.04                                                                                                                                                                                                                                                                                                             |
| Moebus, 2010 <sup>111</sup><br><br>Moebus, 2011 <sup>112</sup><br>[abstract] |                              | Intense dose-dense ECP vs conventional EC→ P<br><br>IDD: E→ P→ C: E (150 mg/m <sup>2</sup> ) q2wx3→ P (225 mg/m <sup>2</sup> ) q2wx3→ C (2500 mg/m <sup>2</sup> ) q2wx3<br><br>EC→ P: E (90 mg/m <sup>2</sup> ) + C (600 mg/m <sup>2</sup> ) q3wx4→ P (175 mg/m <sup>2</sup> ) q3wx4 | 1284  | High risk, N2+ (minimum 10 nodes removed), Stage II-IIIa | 58% N2<br>42% N3<br>30% pT1<br>55% pT2<br>14% pT3 | 48% premenopausal<br>72% ER+<br>69% PR+<br><br>25% HER2+,<br>58% HER2-,<br>18% unknown | Radiation of the supra-clavicular, infraclavicular and parasternal lymph nodes, as well as radiation of the breast for BCS or chest | Median follow-up 62 mo: 5–y survival rate results, dose-dense vs conventional<br>DFS: 70% dose-dense vs 62% conventional, HR=0.72 (95% CI 0.59–0.87), p<0.001<br>OS: 82% vs 77%, HR=0.76 (95% CI 0.59–0.97), p=0.029<br>Dose-dense therapy associated with significantly more non-hematological and hematological adverse effects<br>Conclude dose-dense ECP less well                                                                                                                                                                |



| Author, year                | Trial name, enrolment period    | Intervention                                                                                                                                                                                                                                                         | # pts | Inclusion criteria                                                                                   | Staging                                                                            | Other characteristics*                                                                         | Other                                                                                                    | Results                                                                                                                                                                                                                                                                                                                                                                                                                                         |
|-----------------------------|---------------------------------|----------------------------------------------------------------------------------------------------------------------------------------------------------------------------------------------------------------------------------------------------------------------|-------|------------------------------------------------------------------------------------------------------|------------------------------------------------------------------------------------|------------------------------------------------------------------------------------------------|----------------------------------------------------------------------------------------------------------|-------------------------------------------------------------------------------------------------------------------------------------------------------------------------------------------------------------------------------------------------------------------------------------------------------------------------------------------------------------------------------------------------------------------------------------------------|
|                             |                                 | Filgrastim received every dose-dense cycle but not conventional; dose-dense pts also randomized to receive epoetin alfa                                                                                                                                              |       |                                                                                                      |                                                                                    |                                                                                                | wall for mastectomy recommended in all pts.<br>HR+: 5 y tamoxifen; then 5 y letrozole if post-menopausal | tolerated but significantly improved survival<br><br>Median follow-up 8 y, dose-dense vs conventional:<br>8 pts vs 0 developed acute myeloid leukemia or myelodysplastic syndrome<br>Relapse : 231 pts vs 285 pts, HR=0.71 (95% CI 0.59-0.84), p<0.0001<br>RFS: 62% vs 51%<br>OS: 71% vs 65%, HR=0.76 (95% CI 0.62-0.93), p=0.0086<br>Results independent of hormone receptor, menopausal, HER2 expression status, and number of positive nodes |
| Bermejo, 2013 <sup>18</sup> | GEICAM 2003-10<br><br>2004-2007 | ET→ X vs EC→ T<br><br>ET (90/75 mg/m <sup>2</sup> )q3wx4→ X (1250 mg/m <sup>2</sup> bid d1-14) q3wx4<br>EC (90/600 mg/m <sup>2</sup> )q3wx4→ T (100 mg/m <sup>2</sup> )q3wx4                                                                                         | 1384  | T1-3/N1-3 operable                                                                                   | 66% N1, 25% N2, 9% N3                                                              | Stratified by site, menopausal status, number of nodes (1-3, 4-9, 9+), hormone receptor status | HER2+ pts excluded after first 803 pts recruited; 84% HR+, 11% HER2+                                     | After median follow-up 6.6 y, survival rates at 5 y:<br>•DFS: 82% EC→ X vs 86% EC→ T, HR=1.314 (1.042-1.657), p=0.0208<br>•OS not different: HR=1.113 (95% CI 0.809-1.531), p=0.511<br>EC→ X vs EC→ T : Neutropenia 10% vs 19%, hand-foot syndrome 20% vs 2%, diarrhea 11% vs 3%                                                                                                                                                                |
| Kelly, 2012 <sup>113</sup>  | NCT00050167<br><br>2002-2008    | P→ FEC vs TX→ FEC<br><br>P→ FEC: P (80 mg/m <sup>2</sup> ) q1wx12→ F (500 mg/m <sup>2</sup> ) + E (100 mg/m <sup>2</sup> ) + C (500 mg/m <sup>2</sup> ) q3wx4<br><br>TX→ FEC: X (1500 mg/m <sup>2</sup> ; days 1-14) + T (75 mg/m <sup>2</sup> ) q3wx4→ FEC as above | 601   | Operable. High risk eligible for adjuvant therapy; include pN2a and pN3a, exclude pN2b, cN2, cN3, T4 | 12% Stage 1<br>47% Stage IIA<br>26% Stage IIB<br>10% Stage IIIA<br>4% Stage IIIB-C | 45% premenopausal<br>71% ER+<br>54% PR+<br>6% HER2+<br>25% TN excluded<br>HER2+ after 2005     | 71% received adjuvant endocrine therapy, 72% received adjuvant RT                                        | pCR: 19.8% TX vs 16.4% P, p=0.48<br>Median follow-up 50 mo, was 64 RFS events<br>RFS: 87.5% TX vs 90.7% P, p=0.51<br>RFS, preoperative chemotherapy: 81.5% TX vs 85.5% P, p=0.65<br>RFS, adjuvant chemotherapy: 90.9% TX vs 93.5% P, p=0.66<br>OS: 92.2% XT vs 95% P, p=0.39<br>Hematological and non-hematological adverse                                                                                                                     |



| Author, year                 | Trial name, enrolment period      | Intervention                                                                                                                                                                                                                                                                                    | # pts        | Inclusion criteria                                                                                                                                                                    | Staging              | Other characteristics*                                                                                       | Other | Results                                                                                                                                                        |
|------------------------------|-----------------------------------|-------------------------------------------------------------------------------------------------------------------------------------------------------------------------------------------------------------------------------------------------------------------------------------------------|--------------|---------------------------------------------------------------------------------------------------------------------------------------------------------------------------------------|----------------------|--------------------------------------------------------------------------------------------------------------|-------|----------------------------------------------------------------------------------------------------------------------------------------------------------------|
|                              |                                   | Further stratified by timing of chemotherapy (preoperative, N=110 per group vs adjuvant, N=190 per group)<br>Stopped accrual at annual safety/efficacy review when 35 RFS observed (median follow-up 40 mo) and it was highly unlikely to find a difference among treatments                    |              | (except limited T4 lesions, e.g., focal extension with negative margins). For preoperative portion must have clinically palpable disease in breast or axilla, exclude Stage I (T1N0). |                      |                                                                                                              |       | effects were significantly higher in the XT arm<br>Conclude no difference in efficacy; XT associated with higher GI, skin, neutropenic-related adverse effects |
| Hofmann, 2013 <sup>114</sup> | ADAPT HR+/HER2 -<br>Started 2012- | Neoadjuvant endocrine therapy (3 w; optional if N2/3 or RS ≥26) then randomize high-risk groups to Arm A or B chemotherapy (adjuvant or neoadjuvant), both with endocrine therapy as before<br><br>Paclitaxel <sub>175</sub> q2wx4 → EC q2wx4 vs nab-paclitaxel <sub>125</sub> q1wx8 → EC q2wx4 | 4000 planned | HR+ HER2-                                                                                                                                                                             |                      | High risk=N2/3; or N0/1 with RS ≥26; or N0/1 with RS 12-25 and Ki-67 ≥10% post neoadjuvant endocrine therapy |       | Ongoing, started 2012                                                                                                                                          |
| Hofmann, 2013 <sup>114</sup> | ADAPT Triple negative 2012 -      | Neoadjuvant therapy (12 w): nab-paclitaxel + gemcitabine vs nab-paclitaxel + carboplatin                                                                                                                                                                                                        | 336 planned  | Triple negative (HR- HER2-)                                                                                                                                                           |                      |                                                                                                              |       | Ongoing, started 2012                                                                                                                                          |
| <b>Neoadjuvant</b>           |                                   |                                                                                                                                                                                                                                                                                                 |              |                                                                                                                                                                                       |                      |                                                                                                              |       |                                                                                                                                                                |
| Untch, 2011a <sup>115</sup>  | PREPARE (prognosis)               | <b>Neoadjuvant</b><br>EC → P → surgery (control) vs dd E →                                                                                                                                                                                                                                      | 714          | T2+, included inflammatory                                                                                                                                                            | 57% ypN0<br>43% ypN+ | 68% HR+<br>32% HR-                                                                                           |       | Estimated at 3-y EC → P compared with dd E → dd P → CMF                                                                                                        |



| Author, year                | Trial name, enrolment period | Intervention                                                                                                                                                                                                                                                                                                                                                                                                                                                                                                                                                                                                                                                                                                                                                                                                                                                                                                                                                                             | # pts | Inclusion criteria         | Staging                                                                     | Other characteristics* | Other                  | Results                                                                                                                                                                                                                                                                                                                                                                                            |
|-----------------------------|------------------------------|------------------------------------------------------------------------------------------------------------------------------------------------------------------------------------------------------------------------------------------------------------------------------------------------------------------------------------------------------------------------------------------------------------------------------------------------------------------------------------------------------------------------------------------------------------------------------------------------------------------------------------------------------------------------------------------------------------------------------------------------------------------------------------------------------------------------------------------------------------------------------------------------------------------------------------------------------------------------------------------|-------|----------------------------|-----------------------------------------------------------------------------|------------------------|------------------------|----------------------------------------------------------------------------------------------------------------------------------------------------------------------------------------------------------------------------------------------------------------------------------------------------------------------------------------------------------------------------------------------------|
|                             | 2002-2005                    | <p>dd P → CMF → surgery</p> <p>EC → P → surgery: E (90 mg/m<sup>2</sup>) + C (600 mg/m<sup>2</sup>) q3wx4 → P (175 mg/m<sup>2</sup>) q3wx4 → surgery</p> <p>E → P → CMF → surgery: E (150 mg/m<sup>2</sup>) q2wx3 → P (225 mg/m<sup>2</sup>) q2wx3 → C (500 mg/m<sup>2</sup>) + M (40 mg/m<sup>2</sup>) + F (600 mg/m<sup>2</sup>) days 1&amp;8 q4wx3 → surgery</p> <p>Pts in both groups randomized to receive darbepoetin (DA) or none</p> <p>DA: 4.5 µg/kg body weight q2w starting with first dose E until 14 d after last dose of P, + 200mg oral iron (Fe<sup>2+</sup>) daily</p> <p>dd pts received pegfilgrastim (6 mg SC on day 2 of cycles 1-6 (E<sub>dd</sub> → P<sub>dd</sub>); primary prophylactic use of pegfilgrastim during CMF or in the EC → T arm was not mandatory; filgrastim (5 µg/kg body weight daily) administered in cases of leucopenia for ≥3d, fever &gt; 38.5 C or infection and then pegfilgrastim administered prophylactically in remaining cycles</p> |       |                            | <p>68% &lt;4 cm<br/>32% ≥4 cm</p> <p>8% T4<br/>(including inflammatory)</p> |                        |                        | <p>DFS 76% vs 79%, HR=1.14, p=0.37<br/>OS 88% vs 92%, HR=1.26, p=0.237<br/>Estimated at 3 y, with vs without darbepoetin<br/>DFS 74% vs 80%, HR=1.31, p=0.061<br/>OS 88% vs 92%, HR=1.33, p=0.139<br/>Pts with pCR vs without pCR<br/>DFS: 89% vs 75%, HR=2.27, p=0.001<br/>Concluded neoadjuvant dose-intensified chemotherapy did not improve DFS, darbepoetin might have detrimental effect</p> |
| Untch, 2011b <sup>116</sup> | PREPARE (pCR)                | See previous entry in table <sup>115</sup>                                                                                                                                                                                                                                                                                                                                                                                                                                                                                                                                                                                                                                                                                                                                                                                                                                                                                                                                               | 733   | T2+, included inflammatory | 50% cN0<br>38% cN+                                                          | 42% HR+<br>20% HR-     | 91% of pts had surgery | 13.2% of control and 18.7% of dose-dense group had pCR (p=0.043)                                                                                                                                                                                                                                                                                                                                   |



| Author, year               | Trial name, enrolment period | Intervention                                                                                                                                                                                                                                                                                                                                                                                                                              | # pts       | Inclusion criteria | Staging                                                                  | Other characteristics*                                                          | Other                                                                             | Results                                                                                                                                                                                                                                                                                                                                                                                                                                                                                                                                                                                                                                                                                        |
|----------------------------|------------------------------|-------------------------------------------------------------------------------------------------------------------------------------------------------------------------------------------------------------------------------------------------------------------------------------------------------------------------------------------------------------------------------------------------------------------------------------------|-------------|--------------------|--------------------------------------------------------------------------|---------------------------------------------------------------------------------|-----------------------------------------------------------------------------------|------------------------------------------------------------------------------------------------------------------------------------------------------------------------------------------------------------------------------------------------------------------------------------------------------------------------------------------------------------------------------------------------------------------------------------------------------------------------------------------------------------------------------------------------------------------------------------------------------------------------------------------------------------------------------------------------|
|                            |                              |                                                                                                                                                                                                                                                                                                                                                                                                                                           | 714 treated |                    | 12% unknown<br><br>88% cT1-3<br>8% cT4<br><br>65% T <4 cm<br>30% T ≥4 cm | 38% missing<br><br>42% HER2, 0-1+<br>39% HER2, 2+<br>8% HER2, 3+<br>10% missing | after chemotherapy                                                                | 10% control, 17.4% dose-dense group had cCR<br>DA did not affect pCR, clinical response, or nodal response (p=0.972)<br>In TN subgroup, pCR 44.6% with dose-dense vs 30.4% control (p=0.12)<br>Both chemotherapy groups had had significant decrease in hemoglobin levels; no change in DA+ group<br>DA+ group had more thromboembolic events (6% vs 3%, p=0.055)<br>Hematological adverse effects generally mild, similar in all treatment groups<br>Grade 3-4 sensory neuropathy, neurological complaints, mucositis/stomatitis/proctitis were significantly higher in dose-dense group<br>Conclude: neoadjuvant dose-dense superior in terms of pCR, darbepoetin did not influence response |
| Gianni, 2009 <sup>90</sup> | ECTO<br>1996-2002            | Arm A: surgery → A → CMF vs<br>Arm B: surgery → AP → CMF vs<br>Arm C: AP → CMF → surgery (neoadjuvant)<br><br>Arm A: A (75 mg/m <sup>2</sup> ) q3w × 4 → C (600 mg/m <sup>2</sup> ) + M (40 mg/m <sup>2</sup> ) + F (600 mg/m <sup>2</sup> ) days 1&8 q4w × 4<br><br>Arm B & C: A (60 mg/m <sup>2</sup> ) + P (200 mg/m <sup>2</sup> ) q3w × 4 → C (600 mg/m <sup>2</sup> ) + M (40 mg/m <sup>2</sup> ) + F (600 mg/m <sup>2</sup> ) days | 1355        | T2-3, N0-1         | 54% N0<br>46% N1-2<br><br>80% ≤4 cm<br>20% >4 cm                         | 68% HR+<br>31% HR-                                                              | RT after BCS; tamoxifen offered to all pts at start, only HR+ pts after July 2000 | After follow-up 76 mo, report 7-y survival rates:<br>Arm B vs Arm A<br>DFS: 76% vs 69%, HR=0.73 (95% CI 0.57-0.97), p=0.03<br>OS: 85% vs 82%, HR=0.80 (95% CI 0.56-1.14), p=0.21<br>Arm B vs Arm C<br>DFS: 76% vs 72%, HR=1.21 (95% CI 0.92-1.60), p=0.18<br>OS: 85% vs 84%, HR=1.10 (95% CI 0.77-1.59), p=0.60<br>BCS: 63% arm C vs 34% arm A/B,                                                                                                                                                                                                                                                                                                                                              |





| Author, year                                                                             | Trial name, enrolment period         | Intervention                                                                                                                                                                                                                                                                                                                                                                                                                | # pts | Inclusion criteria                           | Staging                                                           | Other characteristics*           | Other                                                                                 | Results                                                                                                                                                                                                                                                                                                                                                                                                       |
|------------------------------------------------------------------------------------------|--------------------------------------|-----------------------------------------------------------------------------------------------------------------------------------------------------------------------------------------------------------------------------------------------------------------------------------------------------------------------------------------------------------------------------------------------------------------------------|-------|----------------------------------------------|-------------------------------------------------------------------|----------------------------------|---------------------------------------------------------------------------------------|---------------------------------------------------------------------------------------------------------------------------------------------------------------------------------------------------------------------------------------------------------------------------------------------------------------------------------------------------------------------------------------------------------------|
|                                                                                          |                                      | 1&8 q4wx4                                                                                                                                                                                                                                                                                                                                                                                                                   |       |                                              |                                                                   |                                  |                                                                                       | p<0.001<br>Study not powered for OS                                                                                                                                                                                                                                                                                                                                                                           |
| Zambetti, 2013 <sup>91</sup><br>[abstract]                                               | ECTO                                 | See previous entry in table                                                                                                                                                                                                                                                                                                                                                                                                 | 1335  |                                              |                                                                   |                                  |                                                                                       | 10 y results, arm B (AP→ CMF) vs arm A<br><ul style="list-style-type: none"> <li>Freedom from progression (FFP): HR=0.77, p=0.045</li> <li>OS: HR=0.82, p=0.24 (no difference)</li> </ul> Arm B vs Arm C (adjuvant vs neoadjuvant)<br><ul style="list-style-type: none"> <li>Freedom from progression: HR=0.79, p=0.07</li> </ul> Primary chemotherapy (arm C) allowed BCS in a significant percentage of pts |
| Kaufmann, 2010 <sup>117</sup><br>[abstract/poster]<br>Darb-Esfahani, 2009 <sup>118</sup> | GeparDuo<br>NCT00793377<br>1999–2001 | Preoperative dose-intensified AT×4 vs preoperative AC×4→ T×4<br><br>AT: T (50 mg/m <sup>2</sup> ) + A (75 mg/m <sup>2</sup> ) q2wx4<br>AC→ T: A (60 mg/m <sup>2</sup> ) + C (600 mg/m <sup>2</sup> ) q3wx4→ T (100 mg/m <sup>2</sup> ) q3wx4<br>GCSF administered with AT                                                                                                                                                   | 913   | T2–3, N0–2, M0                               | 0.8% T1<br>84% T2<br>15% T3<br>60% N0<br>40% N+                   | 28% ER–PR–<br>72% ER+ and/or PR+ | All received tamoxifen                                                                | Preoperative AC→ T is superior for pCR 14.3% vs 7%, OR=2.22 (95% CI 1.41–3.49), p<0.001<br>Median follow-up 64.3 mo; 5–y DFS and OS reported<br><br>DFS: AC→ T 65% vs AT 69%;<br>HR=1.11 (95% CI 0.884–1.40), p=0.36<br>OS: 84% in both arms                                                                                                                                                                  |
| Untch, 2009 <sup>119</sup>                                                               | AGO 1<br>1998–2002                   | Preoperative E+P vs intense dose-dense (IDD) E→ P<br><br>E+P: E (90 mg/m <sup>2</sup> ) + P (175 mg/m <sup>2</sup> ) q3wx4<br>IDD: E→ P: E (150 mg/m <sup>2</sup> ) q2wx3→ P (250 mg/m <sup>2</sup> ) q2wx3; all received filgrastim (5µg/kg) on days 3–10 of each cycle<br><br>All received 3 cycles of CMF after surgery; C (500 mg/m <sup>2</sup> ) + M (40 mg/m <sup>2</sup> ) + F (600 mg/m <sup>2</sup> ) on days 1&8 | 668   | High risk:<br>85% ≥3 cm;<br>15% inflammatory | 34% N0<br>54% N+<br>12% unknown<br><br>53% T2<br>29% T3<br>18% T4 | 68% HR+<br>49% <50 y old         | Tamoxifen (20 mg/d for 5 y) administered if HR+; RT for all BCS, PMRT where indicated | IDD vs conventional, median follow-up 55 mo<br>Improved pCR rate (18% vs 10%, p=0.008)<br>DFS: HR=0.71 (95% CI 0.54–0.92), p=0.011<br>OS: HR=0.83 (95% CI 0.69–0.99), p=0.041<br>Inflammatory cancers<br>DFS: HR=1.10, p=0.739; OS: HR=1.25, p=0.544<br>Non-inflammatory cancers<br>DFS: HR=0.65 (95% CI 0.48–0.88), p=0.005                                                                                  |



| Author, year                                                | Trial name, enrolment period      | Intervention                                                                                                                                                                                                                                                                                                                                                                                                                               | # pts | Inclusion criteria                                                            | Staging                                                                 | Other characteristics* | Other                                                                                                                  | Results                                                                                                                                                                                                                                                                                                                                                                                                                                                                                                                                                                                                                                                    |
|-------------------------------------------------------------|-----------------------------------|--------------------------------------------------------------------------------------------------------------------------------------------------------------------------------------------------------------------------------------------------------------------------------------------------------------------------------------------------------------------------------------------------------------------------------------------|-------|-------------------------------------------------------------------------------|-------------------------------------------------------------------------|------------------------|------------------------------------------------------------------------------------------------------------------------|------------------------------------------------------------------------------------------------------------------------------------------------------------------------------------------------------------------------------------------------------------------------------------------------------------------------------------------------------------------------------------------------------------------------------------------------------------------------------------------------------------------------------------------------------------------------------------------------------------------------------------------------------------|
|                                                             |                                   | q4w after surgery.                                                                                                                                                                                                                                                                                                                                                                                                                         |       |                                                                               |                                                                         |                        |                                                                                                                        | OS HR=0.77 (95% CI 0.63-0.95), p=0.013<br>IDD associated with significantly more nonhematological adverse effects, anemia, and thrombocytopenia, but similar neutropenia and infection rates                                                                                                                                                                                                                                                                                                                                                                                                                                                               |
| Rastogi, 2008 <sup>44</sup>                                 | NSABP B-27<br>1995-2000           | Preoperative AC→ surgery vs preoperative AC→ T→ surgery vs preoperative AC→ surgery→ T<br><br>AC→ surgery: A (60 mg/m <sup>2</sup> ) + C (600 mg/m <sup>2</sup> ) q3wx4→ surgery<br><br>AC→ T→ surgery: A (60 mg/m <sup>2</sup> ) + C (600 mg/m <sup>2</sup> ) q3wx4→ T (100 mg/m <sup>2</sup> ) q3wx4→ surgery<br><br>AC→ surgery→ T: A (60 mg/m <sup>2</sup> ) + C (600 mg/m <sup>2</sup> ) q3wx4→ surgery→ T (100 mg/m <sup>2</sup> )x4 | 2344  | T1c-3, N0-1; or T1-3, N1                                                      | 70% N0<br>30% N+<br><br>14% T1<br>58% T2<br>28% T3                      |                        | RT after BCS, PMRT not allowed<br><br>All groups:→ Tamoxifen (20mg/day) for 5 y initiated on first day of chemotherapy | After median follow-up 8.5 y, no statistically significant differences in DFS or OS<br>DFS: group 2 vs 1: HR=0.92 (95% CI 0.78-1.08), p=0.29<br>DFS: group 3 vs 1: HR=0.92 (95% CI 0.78-1.08), p=0.29<br>OS: p=0.76 across all 3 arms<br>Addition of T did not significantly impact DFS (HR=0.93, 0.92, p=0.29) or OS (HR=0.93 and 0.97, p=0.46 and 0.76)<br>Preoperative AC→ T significantly increased clinical response (91% vs 86%, p<0.001), cCR (63% vs 40%, p<0.001), and pCR (26% vs 13%, p>0.001) compared to preoperative AC<br>Pts with pCR had significantly superior DFS and OS (8-y follow-up)<br>DFS: HR=0.49, p<0.001, OS: HR=0.36, p<0.001 |
| Mansi, 2010 <sup>97</sup><br><br>Evans, 2005 <sup>120</sup> | Anglo-Celtic (ACCOG)<br>1999-2002 | Neoadjuvant AC vs AT<br>AC: A (60 mg/m <sup>2</sup> ) + C (600 mg/m <sup>2</sup> ) q3w (6 cycles maximum)<br>AT: A (50 mg/m <sup>2</sup> ) + T (75 mg/m <sup>2</sup> ) q3w (6 cycles maximum)<br>6% did not receive surgery after neoadjuvant chemotherapy                                                                                                                                                                                 | 363   | Large tumours (≥3cm), inflammatory, or LABC considered candidates for primary | Before chemotherapy<br>:<br>77% operable<br>15% inflammatory<br>8% LABC |                        |                                                                                                                        | pCR: 24% AC vs 21% A, p=0.61<br>cCR: 17% AC vs 20% AD, p=0.42<br>overall clinical response: 61% AC vs 70% AD, p=0.06<br>5-y survival rates<br>DFS: 54% AC vs 59% AD, p=0.20<br>OS: 67% AC vs 72% AD, p=0.24                                                                                                                                                                                                                                                                                                                                                                                                                                                |



| Author, year                                       | Trial name, enrolment period | Intervention                                                                                                                                                                                                                                               | # pts | Inclusion criteria                                                                                | Staging                                                              | Other characteristics*                                                                                    | Other                                                     | Results                                                                                                                                                                                                                                                                                                                                                                                                                                                                                                                                                                                |
|----------------------------------------------------|------------------------------|------------------------------------------------------------------------------------------------------------------------------------------------------------------------------------------------------------------------------------------------------------|-------|---------------------------------------------------------------------------------------------------|----------------------------------------------------------------------|-----------------------------------------------------------------------------------------------------------|-----------------------------------------------------------|----------------------------------------------------------------------------------------------------------------------------------------------------------------------------------------------------------------------------------------------------------------------------------------------------------------------------------------------------------------------------------------------------------------------------------------------------------------------------------------------------------------------------------------------------------------------------------------|
|                                                    |                              |                                                                                                                                                                                                                                                            |       | chemotherapy                                                                                      | Median 6 cm                                                          |                                                                                                           |                                                           |                                                                                                                                                                                                                                                                                                                                                                                                                                                                                                                                                                                        |
| Lee, <sup>39</sup><br>2008                         | 2002–2005                    | Neoadjuvant TX→ surgery→ AC vs<br>Neoadjuvant AC→ surgery→ TX                                                                                                                                                                                              | 204   | N+, Stage II/III                                                                                  | Stage II/III<br><br>77% T1–2,<br>23% T3–4<br><br>69% N1,<br>31% N2–3 | 61% HR+<br><br>34% HER2+<br>47% HER2–<br>18% unknown                                                      | All received<br>RT; tamoxifen<br>or anastrozole<br>if HR+ | At median follow-up of 37 mo, no significant difference in DFS by treatment groups (p=0.932).<br>Compared with AC, TX increased pCR in primary tumours (21% vs 10%, p=0.024) and clinical response (84% vs 65%, p=0.003). Fewer pts developed recurrence who achieved pCR in lymph node (LN); HR=0.189 (95% CI 0.044–0.815), p=0.025 in the multivariate analysis.<br>TX was associated with less nausea and vomiting, but more stomatitis, diarrhea, myalgia, and skin/nail changes than AC                                                                                           |
| Earl, <sup>24</sup><br>2014                        | Neo-tAnGo                    | Neoadjuvant:<br>EC→ P vs P→ EC vs EC→ GP vs<br>GP→ EC<br><br>Effect of gemcitabine and role of<br>sequence (EC→ P vs P→ EC)<br>stratified by ER status, tumour size<br>(50 mm cut-off), nodal status<br>(N0/N+), inflammatory/locally<br>advanced (yes/no) | 831   | Early invasive,<br>>2 cm; no<br>previous<br>chemo, RT,<br>endocrine<br>therapy<br><br>T4 eligible | 80% T2,<br>20% T3<br>50% N+                                          | 67% ER+<br>51% PR+<br>25%<br>inflammatory or<br>LABC;<br>57%<br>premenopausal<br>, 6% peri-<br>menopausal |                                                           | Median follow-up 47 mo; first planned interim analysis found no significant difference in DFS or OS<br><ul style="list-style-type: none"> <li>• DFS : EC→ P vs EC→ PG HR=1.13 (95% CI 0.88–1.46), p=0.34; P→ EC vs EC→ P HR=0.84 (95% CI 0.65–1.09), p=0.18</li> <li>• OS: EC→ P vs EC→ PG HR=1.02 (95% CI 0.76–1.39), p=0.89; P→ EC vs EC→ P HR=0.82 (95% CI 0.60–1.11), p=0.19</li> <li>• pCR greater with P→ EC than EC→ P (20% vs 15%, p=0.03); G did not increase pCR</li> <li>• pCR was correlated with significant improvement in DFS (p&lt;0.001) and OS (p=0.0007)</li> </ul> |
| Von<br>Minckwitz,<br>2008, <sup>121-</sup><br>2013 | GeparTrio<br>2002–2005       | TAC vs NX if poor response to TAC<br><br>2 cycles TAC then evaluated<br>response; early responders                                                                                                                                                         | 2012  | Tumour ≥2<br>cm; at least<br>one risk factor<br>of age <36 y,                                     | 61% T2, 19%<br>T3, 12% T4a-<br>c, 5% T4d;<br>median 40               | LABC,<br>inflammatory,<br>N3 including or<br>supraclavicular                                              |                                                           | Median follow-up 62 mo<br><ul style="list-style-type: none"> <li>• Early responders: DFS better for TACx8 than TACx6 (HR=0.78, 95% CI 0.62–0.97, p=0.026)</li> <li>• Early non-responders: DFS better for</li> </ul>                                                                                                                                                                                                                                                                                                                                                                   |



| Author, year                 | Trial name, enrolment period                  | Intervention                                                                                                                                                                                                                                                                                            | # pts | Inclusion criteria                        | Staging                                         | Other characteristics*                        | Other | Results                                                                                                                                                                                                                                                                                                                                                                                                                                                                                                                                                                                                                                                                                                                                                                                                                                                               |
|------------------------------|-----------------------------------------------|---------------------------------------------------------------------------------------------------------------------------------------------------------------------------------------------------------------------------------------------------------------------------------------------------------|-------|-------------------------------------------|-------------------------------------------------|-----------------------------------------------|-------|-----------------------------------------------------------------------------------------------------------------------------------------------------------------------------------------------------------------------------------------------------------------------------------------------------------------------------------------------------------------------------------------------------------------------------------------------------------------------------------------------------------------------------------------------------------------------------------------------------------------------------------------------------------------------------------------------------------------------------------------------------------------------------------------------------------------------------------------------------------------------|
| 124                          |                                               | randomized to 4 (N=704) or 6 (N=686) additional cycles TAC<br><br>If no sonographic response (reduction in product of 2 largest perpendicular diameters was <50%) then randomized to 4 additional cycles TAC (N=321) or vinorelbine + capecitabine (NX; N=301); excluded those with disease progression |       | <5 cm, ER-PR-, N+, undifferentiated grade | mm by palpation and 29 mm by sonography; 42% N0 | nodes were assigned within a separate stratum |       | TAC→NX than TACx6 (HR=0.59, 95% CI 0.49–0.82, p=0.001);<br><ul style="list-style-type: none"> <li>• DFS for non-responders administered TAC→NX similar to early responders administered TACx8</li> <li>• Response-guided therapy (TACx8 or TAC→NX) better than TACx6 for DFS overall (HR=0.71, p&lt;0.003) and for subgroups HR+ (luminal A, luminal B) but not HR- or TN pCR predicted improved DFS in TN, HER2+ (nonluminal) and luminal B (Her2-)</li> <li>• Adverse effects: NX had more hand-foot syndrome and sensory neuropathy but less hematological adverse effects, mucositis, infections, and nail changes</li> <li>• Post-treatment (after 2 cycles TAC) Ki-67 levels gave prognostic information for pts with HR+ cancer with residual disease after neoadjuvant chemotherapy (high Ki-67 had higher risk for relapse or death, p&lt;0.0001)</li> </ul> |
| Hofmann, 2013 <sup>114</sup> | ADAPT HR+/HER2-; ADAPT Triple negative 2012 - | See previously in this table (second-generation studies)                                                                                                                                                                                                                                                |       |                                           |                                                 |                                               |       | Ongoing, started 2012                                                                                                                                                                                                                                                                                                                                                                                                                                                                                                                                                                                                                                                                                                                                                                                                                                                 |

Abbreviations: A, doxorubicin (Adriamycin); AC, doxorubicin + cyclophosphamide; ALND, axillary lymph node dissection; AT, doxorubicin + docetaxel; BCS, breast-conserving surgery; BCT, breast conserving therapy (BCS +RT); cCR, clinically complete response; CEF, cyclophosphamide + epirubicin + fluorouracil; CEX, cyclophosphamide + epirubicin + capecitabine; C, cyclophosphamide; CMF, cyclophosphamide + methotrexate + fluorouracil; dd, dose-dense; DDFS, distant disease-free survival rate; DFS, disease-free survival rate; E,



epirubicin; EC, epirubicin + cyclophosphamide; EFS, event-free survival rate; EGFR, epidermal growth-factor receptor; ER, estrogen receptor; ET, epirubicin + docetaxel; F, 5-fluorouracil; FAC, fluorouracil + doxorubicin + cyclophosphamide; FEC, fluorouracil + epirubicin + cyclophosphamide; G, gemcitabine; HER2, human epidermal growth factor receptor 2; HR, hazard ratio; HR+, Hormone receptor positive; HR-, hormone receptor negative; HRQoL, health-related quality of life; IDD, intensive dose-dense; IDFS, invasive disease-free survival rate; IHC, immunohistochemistry; LRR, locoregional recurrence; LVI, lymphovascular invasion; N0, no positive nodes; N+, positive nodes found; N1, 1–3 positive nodes; N2, 4–9 positive nodes; N3, 10+ positive nodes; nab-paclitaxel, nanoparticle albumin-bound-paclitaxel; NX, vinorelbine + capecitabine; OS, overall-survival rate; P, paclitaxel; pCR, pathologically complete response; PMRT, postmastectomy radiation therapy; PR, progesterone receptor; pts, patients; QoL, quality of life; RFS, recurrence-free survival rate; RR, relative risk; RT, radiation therapy; T, docetaxel (Taxotere); TAC, docetaxel + doxorubicin + cyclophosphamide; TN, triple negative (PR-,ER-, and HER2-); TOI, trial outcome index; TTR, time to recurrence; TX, docetaxel + capecitabine; X, capecitabine

\*HER2, ER/PR, lymph node, risk, menopausal status

Intrinsic subtypes: luminal A=(ER+ and/or PR+) and not (HER2+ or Ki-67<sup>high</sup>); luminal B=(ER+ and/or PR+) and either (HER2+ and/or Ki-67<sup>high</sup>); HER2=HER2+ and ER-; triple negative (TN)=PR- and ER- and HER2-; basal=TN and either (EGFR+ or cytokeratins 5/6+)

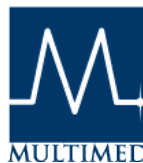

### Supplementary Appendix 1: Literature Search Strategy

1. (exp Breast Neoplasms/ or exp breast tumour/ or exp breast cancer/ or breast cancer.mp. or breast neoplasm:.mp. or ((cancer: or neoplasm: or tumo?:r: or carcinom:)) and (breast or mammar:)).mp)
2. exp chemoradiotherapy/ or exp chemotherapy, adjuvant/ or exp neoadjuvant therapy/ or exp adjuvant therapy/ or exp cancer hormone therapy/ or exp cancer adjuvant therapy/ or exp cancer combination chemotherapy/ or exp aromatase inhibitors/ or exp antineoplastic agents/ or (adjuvant or neoadjuvant or chemotherapy or hormonotherapy).mp.
3. (**Anthracycline#** or doxorubicin or Adriamycin or epirubicin or Ellence or **Alkylating agent#** or cyclophosphamide or Cytosan or Neosar or Fluorouracil or 5-fluorouracil or 5-FU or Aduvial or methotrexate or amethopterin or Mexate or Folex or Rheumatex or gemcitabine or Gemzar or **Taxane#** or docetaxel or Taxotere or paclitaxel or Taxol or Abraxane or carboplatin or Paraplatin or cisplatin or Platinol or TAC, ACMF, ACT, ATC, CAF, FAC, CEF, CMF or **Anti-estrogens** or **Selective Estrogen Receptor Modulator:** or **SERM:** or **Endocrine Therapy** or tamoxifen or Nolvadex or Apo-Tamox or Tamofen or Tamone or **Aromatase Inhibitor#** or anastrozole or Arimidex or exemestane or Aromasin or letrozole or Femara or fulvestrant or Faslodex or **HER2 inhibitor:** or trastuzumab or Herceptin or lapatinib or Tykerb or **Antiangiogenesis:** or bevacizumab or Avastin or **Granulocyte colony stimulating factor** or GCSF or Pegfilgrastim or Neulasta or filgrastim or Neupogen or **Bisphosphonate:** or Pamidronate or Aredia or zoledronic acid or Zometa).mp)
4. Ovariectomy/ or exp gonadotropin-releasing hormone/ or exp gonadorelin derivative/ or exp luteinizing hormone/ or (ovariectomy or (ovar: adj3 ablation) or (ovar: adj3 suppression) or (ovar: adj3 irradiation)).mp or (gnrh or gonadorelin or lhrh agonist or lhrn analog or leuprolide or buserelin or triptorelin or Lupron or goserelin or Zoladex or Trelstar).mp)
5. exp randomized controlled trial/ or exp "randomized controlled trial (topic)"/ or exp randomized controlled trials as topic/ or exp phase 2 clinical trial/ or exp phase 3 clinical trial/ or exp phase 4 clinical trial/ or exp clinical trials, phase II/ or exp clinical trials, phase III/ or exp clinical trials, phase IV/ or (randomized controlled trial or clinical trial, phase III or clinical trial, phase II).pt. or (random\$ control\$ trial? or rct or phase II or phase III or phase IV or phase 2 or phase 3 or phase 4).tw. or ((exp clinical trial/ or exp "clinical trial (topic)"/ or exp controlled study/ or clinical trial\$.mp. or clinicaltrial\$.mp.) and (random\$.tw. or randomization/)) or (random\$ adj3 trial\$).mp. or randomization/ or "clinicaltrials.gov".mp)
6. (meta-analysis.mp. or meta-analysis/ or meta-analysis.pt. or (meta-analy: or metaanaly: or meta analy:).tw. or (systematic review or systematic overview).mp. or (cochrane or MEDLINE or EMBASE or cancerlit).ti. or (hand search or hand-search or manual search).ti. or practice guideline\$.mp. or Practice Guideline/ or practice guideline.pt. or practice parameter:.tw)

1 and (2 or 3 or 4) and (5 or 6), limit to yr="2008 -Current", and duplicates removed

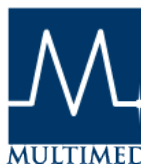

## REFERENCES

1. Amadori D, Nanni O, Volpi A, *et al.* Phase III randomized multicenter study on the effects of adjuvant CMF in patients with node-negative, rapidly proliferating breast cancer: twelve-year results and retrospective subgroup analysis. *Breast Cancer Res Treat.* 2008;108:259-64.
2. Amadori D, Nanni O, Marangolo M, *et al.* Disease-free survival advantage of adjuvant cyclophosphamide, methotrexate, and fluorouracil in patients with node-negative, rapidly proliferating breast cancer: a randomized multicenter study. *J Clin Oncol.* 2000;18:3125-34.
3. Taucher S, Steger GG, Jakesz R, *et al.* The potential risk of neoadjuvant chemotherapy in breast cancer patients--results from a prospective randomized trial of the Austrian Breast and Colorectal Cancer Study Group (ABCSG-07). *Breast Cancer Res Treat.* 2008;112:309-16.
4. Muss HB, Berry DA, Cirincione CT, *et al.* Adjuvant chemotherapy in older women with early-stage breast cancer. *N Engl J Med.* 2009;360:2055-65. [Erratum in: *N Engl J Med.* 09 Oct 22;361(17):1714].
5. Kornblith AB, Lan L, Archer L, *et al.* Quality of life of older patients with early-stage breast cancer receiving adjuvant chemotherapy: a companion study to Cancer and Leukemia Group B 49907. *J Clin Oncol.* 2011;29:1022-8.
6. Ejlertsen B, Mouridsen HT, Jensen M-B, *et al.* Cyclophosphamide, methotrexate, and fluorouracil; oral cyclophosphamide; levamisole; or no adjuvant therapy for patients with high-risk, premenopausal breast cancer. *Cancer.* 2010;116:2081-9.
7. Ejlertsen B, Mouridsen HT, Jensen M-B. Adjuvant cyclophosphamide, methotrexate, and fluorouracil in premenopausal patients with node-positive breast cancer: indirect comparison of dose and schedule in DBCG trials 77, 82, and 89. *Acta Oncol.* 2008;47:662-71.
8. Ejlertsen B, Mouridsen HT, Jensen M-B, *et al.* Improved outcome from substituting methotrexate with epirubicin: results from a randomised comparison of CMF versus CEF in patients with primary breast cancer. *Eur J Cancer.* 2007;43:877-84.
9. Joensuu H, Kellokumpu-Lehtinen P-L, Huovinen R, *et al.* Adjuvant capecitabine, docetaxel, cyclophosphamide, and epirubicin for early breast cancer: final analysis of the randomized FinXX trial. *J Clin Oncol.* 2012;30:11-8.
10. Canney P, Coleman R, Morden J, *et al.* TACT2 trial in early breast cancer (EBC): Differential rates of amenorrhoea in premenopausal women following adjuvant epirubicin (E) or accelerated epirubicin (AE) followed by capecitabine (X) or CMF (CRUK/05/019) [abstract]. *Eur J Cancer.* 2012;48:S102. Abstract no. 200.
11. Canney P, Barrett-Lee P, Bartlett J, *et al.* The UK TACT2 Trial: Non-inferiority of capecitabine compared with CMF after epirubicin in patients requiring chemotherapy for early breast cancer (EBC) (CRUK/05/019) [abstract]. *Eur J Cancer.* 2014;50:S99-S100. Abstract no. 94.
12. Helwick C. Dose-dense chemotherapy in breast cancer: Epirubicin-based regimens studied in German and UK trials. 2013 Mar 1 [cited 2014 Jun 18]. The ASCO Post [serial on the Internet]. 4(4) Available from: <http://www.ascopost.com/issues/march-1,-2013/dose-dense-chemotherapy-in-breast-cancer-epirubicin-based-regimens-studied-in-german-and-uk-trials.aspx>
13. Velikova G, Barrett-Lee P, Bloomfield D, *et al.* Quality of life results of the UK TACT2 Trial: More intensive chemotherapy for early breast cancer has a measurable impact on patient-reported symptoms and functioning (CRUK/05/019) [abstract]. *Eur J Cancer.* 2014;50:S109. Abstract no. 227.
14. Ohno S, Chow LWC, Sato N, *et al.* Randomized trial of preoperative docetaxel with or without capecitabine after 4 cycles of 5-fluorouracil-epirubicin-cyclophosphamide (FEC) in early-stage

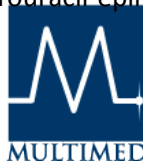

- breast cancer: Exploratory analyses identify Ki67 as a predictive biomarker for response to neoadjuvant chemotherapy. *Breast Cancer Res Treat.* 2013;142:69-80.
15. Pippin JE, Paul D, Stokoe CT, *et al.* Randomized, phase III study of adjuvant doxorubicin plus cyclophosphamide (AC) -> docetaxel (T) with or without capecitabine (X) in high-risk early breast cancer: Exploratory Ki-67 analyses [abstract]. *J Clin Oncol.* 2011;29:Abstract no. 500.
  16. O'Shaughnessy J, Paul D, Stokoe C, *et al.* First efficacy results of a randomized, open-label, phase III study of adjuvant doxorubicin plus cyclophosphamide, followed by docetaxel with or without capecitabine, in high-risk early breast cancer [abstract]. *Cancer Res.* 2010;70:Abstract no. S4-2.
  17. O'Shaughnessy J, Pippin JE, Paul D, *et al.* Adjuvant capecitabine for invasive lobular/mixed early breast cancer (EBC): USON 01062 exploratory analyses [abstract]. *J Clin Oncol.* 2012;30:Abstract no. 547.
  18. Bermejo B, Ruiz A, Borrego MR, *et al.* Randomized phase III study of adjuvant chemotherapy for node-positive early breast cancer (BC) patients (pts) comparing epirubicin plus cyclophosphamide followed by docetaxel (EC-T) versus epirubicin plus docetaxel followed by capecitabine (ET-X): Efficacy analysis of the GEICAM/2003-10 trial [abstract]. *J Clin Oncol.* 2013;31.
  19. Watanabe T, Sano M, Takashima S, *et al.* Oral uracil and tegafur compared with classic cyclophosphamide, methotrexate, fluorouracil as postoperative chemotherapy in patients with node-negative, high-risk breast cancer: National Surgical Adjuvant Study for Breast Cancer 01 Trial. *J Clin Oncol.* 2009;27:1368-74.
  20. Hara F, Watanabe T, Shimozuma K, Ohashi Y. Efficacy, toxicity and quality of life in older patients with early-stage breast cancer treated with oral Tegafur-uracil or classical CMF (cyclophosphamide, methotrexate, and fluorouracil): An exploratory analysis of national surgical adjuvant study for breast cancer (N-SAS BC) 01 Trial [abstract]. *Cancer Res.* 2012;72:Abstract no. P1-13-0.
  21. Ejlertsen B, Jensen MB, Elversang J, *et al.* One year of adjuvant tamoxifen compared with chemotherapy and tamoxifen in postmenopausal patients with stage II breast cancer. *Eur J Cancer.* 2013;49:2986-94.
  22. Colleoni M. International Breast Cancer Study Group (IBCSG) trial 22-00: Low-dose cytotoxics as maintenance "anti-angiogenesis treatment" following adjuvant induction chemotherapy for patients with ER-negative and PgR-negative breast cancer [abstract]. *Cancer Res.* 2011;71.
  23. Wardley AM, Hiller L, Howard HC, *et al.* tAnGo: a randomised phase III trial of gemcitabine in paclitaxel-containing, epirubicin/cyclophosphamide-based, adjuvant chemotherapy for early breast cancer: a prospective pulmonary, cardiac and hepatic function evaluation. *Br J Cancer.* 2008;99:597-603.
  24. Earl HM, Vallier AL, Hiller L, *et al.* Effects of the addition of gemcitabine, and paclitaxel-first sequencing, in neoadjuvant sequential epirubicin, cyclophosphamide, and paclitaxel for women with high-risk early breast cancer (Neo-tAnGo): An open-label, 2x2 factorial randomised phase 3 trial. *Lancet Oncol.* 2014;15:201-12.
  25. Toi M, Ohno S, Sato N, *et al.* Preoperative docetaxel (T) with or without capecitabine (X) following epirubicin, 5-fluorouracil and cyclophosphamide (FEC) in patients with operable breast cancer (OOTR N003): Results of comparative study and predictive marker analysis [abstract]. *Cancer Res.* 2012;72:Abstract no. P1-14-02.
  26. Schneeweiss A, Marme F, Ruiz A, *et al.* A randomized phase II trial of doxorubicin plus pemetrexed followed by docetaxel versus doxorubicin plus cyclophosphamide followed by docetaxel as neoadjuvant treatment of early breast cancer. *Ann Oncol.* 2011;22:609-17.

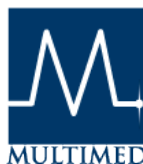



27. de Azambuja E, Paesmans M, Beauduin M, *et al.* Long-term benefit of high-dose epirubicin in adjuvant chemotherapy for node-positive breast cancer: 15-year efficacy results of the Belgian multicentre study. *J Clin Oncol.* 2009;27:720-5.
28. Kimura M, Tominaga T, Takatsuka Y, *et al.* Randomized trial of cyclophosphamide, epirubicin, and fluorouracil chemotherapy compared with cyclophosphamide, methotrexate, and fluorouracil with node-positive breast cancer in Japan. *Breast Cancer.* 2010;17:190-8.
29. Amadori D, Silvestrini R, De Lena M, *et al.* Randomized phase III trial of adjuvant epirubicin followed by cyclophosphamide, methotrexate, and 5-fluorouracil (CMF) versus CMF followed by epirubicin in patients with node-negative or 1-3 node-positive rapidly proliferating breast cancer. *Breast Cancer Res Treat.* 2011;125:775-84.
30. Rocca A, Bravaccini S, Scarpi E, *et al.* Benefit from anthracyclines in relation to biological profiles in early breast cancer. *Breast Cancer Res Treat.* 2014;144:307-18.
31. Cheang MCU, Voduc KD, Tu D, *et al.* Responsiveness of intrinsic subtypes to adjuvant anthracycline substitution in the NCIC.CTG MA.5 randomized trial. *Clin Cancer Res.* 2012;18:2402-12.
32. Bartlett JM, Munro AF, Dunn JA, *et al.* Predictive markers of anthracycline benefit: a prospectively planned analysis of the UK National Epirubicin Adjuvant Trial (NEAT/BR9601). *Lancet Oncol.* 2010;11:266-74.
33. Poole CJ, Earl HM, Hiller L, *et al.* Epirubicin and cyclophosphamide, methotrexate, and fluorouracil as adjuvant therapy for early breast cancer. *N Engl J Med.* 2006;355:1851-62.
34. Earl HM, Hiller L, Dunn JA, *et al.* Adjuvant epirubicin followed by cyclophosphamide, methotrexate and fluorouracil (CMF) vs CMF in early breast cancer: Results with over 7 years median follow-up from the randomised phase III NEAT/BR9601 trials. *Br J Cancer.* 2012;107:1257-67.
35. Earl HM, Hiller L, Dunn JA, *et al.* NEAT: National Epirubicin Adjuvant Trial--toxicity, delivered dose intensity and quality of life. *Br J Cancer.* 2008;99:1226-31.
36. van Nes JGH, Putter H, Julien J-P, *et al.* Preoperative chemotherapy is safe in early breast cancer, even after 10 years of follow-up; clinical and translational results from the EORTC trial 10902. *Breast Cancer Res Treat.* 2009;115:101-13.
37. Budd TG, Barlow WE, Moore HCF, *et al.* S0221: Comparison of two schedules of paclitaxel as adjuvant therapy for breast cancer [abstract]. *J Clin Oncol.* 2013;31:Abstract no. CRA1008.
38. Budd GT, Barlow WE, Moore HCF, *et al.* First analysis of SWOG S0221: A phase III trial comparing chemotherapy schedules in high-risk early breast cancer [abstract]. *J Clin Oncol.* 2011;29:Abstract no. 1004.
39. Lee KS, Ro J, Nam B-H, *et al.* A randomized phase-III trial of docetaxel/capecitabine versus doxorubicin/cyclophosphamide as primary chemotherapy for patients with stage II/III breast cancer. *Breast Cancer Res Treat.* 2008;109:481-9.
40. Burnell M, Levine MN, Chapman J-AW, *et al.* Cyclophosphamide, epirubicin, and fluorouracil versus dose-dense epirubicin and cyclophosphamide followed by paclitaxel versus doxorubicin and cyclophosphamide followed by paclitaxel in node-positive or high-risk node-negative breast cancer. *J Clin Oncol.* 2010;28:77-82.
41. Janni W, Harbeck N, Sommer HL, *et al.* Sequential treatment with epirubicin/cyclophosphamide, followed by docetaxel versus FEC120 in the adjuvant treatment of node-positive breast cancer patients: Final survival analysis of the German ADEBAR phase III study [abstract]. *J Clin Oncol.* 2012;30:Abstract no. 1081.
42. Schoenherr A, Kiechle M, Harbeck N, *et al.* Toxicity analysis of the ADEBAR-trial: Sequential anthracycline-taxane compared to FEC120 in adjuvant treatment of high risk breast cancer patients [abstract]. *Arch Gynecol Obstet.* 2010;282:S47. Abstract no. FV-Onko 03.15.

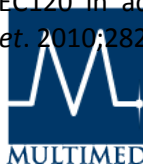

43. Kerbrat P, Coudert B, Asselain B, *et al.* Optimal duration of adjuvant chemotherapy for high risk node negative breast cancer patients: 6-year results of the prospective randomized phase III trial PACS 05 [abstract]. *Cancer Res.* 2012;72:Abstract no. P1-13-04
44. Rastogi P, Anderson SJ, Bear HD, *et al.* Preoperative chemotherapy: updates of National Surgical Adjuvant Breast and Bowel Project Protocols B-18 and B-27. *J Clin Oncol.* 2008;26:778-85. [Erratum in: *J Clin Oncol.* 2008 Jun 1;26(16):793].
45. Mamounas EP, Bryant J, Lembersky B, *et al.* Paclitaxel after doxorubicin plus cyclophosphamide as adjuvant chemotherapy for node-positive breast cancer: Results from NSABP B-28. *J Clin Oncol.* 2005;23:3686-96.
46. Puztai L, Jeong J-H, Gong Y, *et al.* Evaluation of microtubule-associated protein-Tau expression as a prognostic and predictive marker in the NSABP-B 28 randomized clinical trial. *J Clin Oncol.* 2009;27:4287-92.
47. Vici P, Brandi M, Giotta F, *et al.* A multicenter phase III prospective randomized trial of high-dose epirubicin in combination with cyclophosphamide (EC) versus docetaxel followed by EC in node-positive breast cancer. GOIM (Gruppo Oncologico Italia Meridionale) 9902 study. *Ann Oncol.* 2012;23:1121-9.
48. Henderson IC, Berry DA, Demetri GD, *et al.* Improved outcomes from adding sequential paclitaxel but not from escalating doxorubicin dose in an adjuvant chemotherapy regimen for patients with node-positive primary breast cancer. *J Clin Oncol.* 2003;21:976-83.
49. Sartor CI, Peterson BL, Woolf S, *et al.* Effect of addition of adjuvant paclitaxel on radiotherapy delivery and locoregional control of node-positive breast cancer: Cancer and Leukemia group B 9344. *J Clin Oncol.* 2005;23:30-40.
50. Hayes DF, Thor AD, Dressler LG, *et al.* HER2 and response to paclitaxel in node-positive breast cancer. *N Engl J Med.* 2007;357:1496-506.
51. Berry D, Thor A, Jewell SD, *et al.* Benefits of adding paclitaxel to adjuvant doxorubicin/cyclophosphamide depending on HER2 & ER status: analysis of tumor tissue microarrays and immunohistochemistry in CALGB 9344 (Intergroup 0148) [abstract]. *Cancer Res.* 2009;69:Abstract no.606.
52. Lara JF, Thor AD, Dressler LG, *et al.* p53 Expression in node-positive breast cancer patients: results from the Cancer and Leukemia Group B 9344 Trial (159905). *Clin Cancer Res.* 2011;17:5170-8.
53. Cognetti F, De Laurentiis M, De Matteis A, *et al.* Sequential epirubicin-docetaxel-CMF as adjuvant therapy for node-positive early stage breast cancer: Updated results of the taxit216 randomized trial [abstract]. *Ann Oncol.* 2008;19:viii77. Abstract no. 1820.
54. Francis P, Crown J, Di Leo A, *et al.* Adjuvant chemotherapy with sequential or concurrent anthracycline and docetaxel: Breast International Group 02-98 randomized trial. *J Natl Cancer Inst.* 2008;100:121-33. [Erratum in: *J Natl Cancer Inst.* 2008 Nov 19;100(22):1655].
55. Oakman C, Francis PA, Crown J, *et al.* Overall survival benefit for sequential doxorubicin-docetaxel compared with concurrent doxorubicin and docetaxel in node-positive breast cancer--8-year results of the Breast International Group 02-98 phase III trial. *Ann Oncol.* 2013;24:1203-11. Epub: 2013 Jan 4.
56. Fernandez-Cuesta L, Oakman C, Falagan-Lotsch P, *et al.* Prognostic and predictive value of TP53 mutations in node-positive breast cancer patients treated with anthracycline- or anthracycline/taxane-based adjuvant therapy: results from the BIG 02-98 phase III trial. 2012 [cited 2012 Jul 6]. *Breast Cancer Res* [serial on the Internet]. 14(3):R70 [13 p] Available from: <http://breast-cancer-research.com/content/pdf/bcr3179.pdf>



57. Martin M, Ruiz A, Ruiz Borrego M, *et al.* Fluorouracil, doxorubicin, and cyclophosphamide (FAC) versus FAC followed by weekly paclitaxel as adjuvant therapy for high-risk, node-negative breast cancer: results from the GEICAM/2003-02 study. *J Clin Oncol.* 2013;31:2593-9.
58. Delbaldo C, Serin D, Mousseau M, *et al.* A phase III adjuvant randomised trial of 6 cycles of 5-fluorouracil- epirubicine-cyclophosphamide (FEC100) versus 4 FEC 100 followed by 4 Taxol (FEC-T) in node positive breast cancer patients (Trial B2000). *Eur J Cancer.* 2014;50:23-30.
59. Martin M, Rodriguez-Lescure A, Ruiz A, *et al.* Randomized phase 3 trial of fluorouracil, epirubicin, and cyclophosphamide alone or followed by Paclitaxel for early breast cancer. *J Natl Cancer Inst.* 2008;100:805-14.
60. Martin M, Rodriguez-Lescure A, Ruiz A, *et al.* Molecular predictors of efficacy of adjuvant weekly paclitaxel in early breast cancer. *Breast Cancer Res Treat.* 2010;123:149-57.
61. Fountzilias G, Dafni U, Gogas H, *et al.* Postoperative dose-dense sequential chemotherapy with epirubicin, paclitaxel and CMF in patients with high-risk breast cancer: safety analysis of the Hellenic Cooperative Oncology Group randomized phase III trial HE 10/00. *Ann Oncol.* 2008;19:853-60.
62. Gogas H, Dafni U, Karina M, *et al.* Postoperative dose-dense sequential versus concomitant administration of epirubicin and paclitaxel in patients with node-positive breast cancer: 5-Year results of the Hellenic Cooperative Oncology Group HE 10/00 phase III Trial. *Breast Cancer Res Treat.* 2012;132:609-19.
63. Citron ML, Berry DA, Cirrincione C, *et al.* Randomized trial of dose-dense versus conventionally scheduled and sequential versus concurrent combination chemotherapy as postoperative adjuvant treatment of node-positive primary breast cancer: first report of Intergroup Trial C9741/Cancer and Leukemia Group B Trial 9741. *J Clin Oncol.* 2003;21:1431-9. [Erratum appears in *J Clin Oncol.* 2003 Jun 1;21(11):226].
64. Polyzos A, Malamos N, Boukovinas I, *et al.* FEC versus sequential docetaxel followed by epirubicin/cyclophosphamide as adjuvant chemotherapy in women with axillary node-positive early breast cancer: a randomized study of the Hellenic Oncology Research Group (HORG). *Breast Cancer Res Treat.* 2010;119:95-104.
65. Joensuu H, Bono P, Kataja V, *et al.* Fluorouracil, epirubicin, and cyclophosphamide with either docetaxel or vinorelbine, with or without trastuzumab, as adjuvant treatments of breast cancer: final results of the FinHer Trial. *J Clin Oncol.* 2009;27:5685-92.
66. Nitz U, Huober J, Lisboa B, *et al.* Superiority of sequential docetaxel over standard FE100C in patients with intermediate risk breast cancer: Survival results of the randomized intergroup phase III trial EC-Doc [abstract]. *Cancer Res.* 2009;69:Abstract no. 78.
67. Huober J, Gluz O, Hartmann A, *et al.* Evidence for predictive and prognostic impact of molecular classification in taxane-based chemotherapy in intermediate risk breast cancer — an analysis of the WSG EC-Doc trial [abstract]. *Cancer Res.* 2010;70:Abstract no. P2-09-14.
68. Nitz U, Gluz O, Liedtke C, *et al.* Comparison of predictive and prognostic impact of molecular subtypes and central grade regarding taxane-based therapy in intermediate-risk breast cancer: Results from the EC-Doc trial [abstract]. *J Clin Oncol.* 2011;29:Abstract no. 10625.
69. Gluz O, Erber R, Kates R, *et al.* Predictive value of HER2, topoisomerase-II (Topo-II) and tissue inhibitor of metalloproteinases (TIMP-1) for efficacy of taxane-based chemotherapy in intermediate risk breast cancer – results from the EC-Doc trial [abstract]. Abstracts from the 34th annual SABCS Dec 6-10, 2011 [Internet] 2011 Dec 6-10 [cited 2012 Jul 16]. Abstract P1-06-03 Available from: [http://www.abstracts2view.com/sabcs11/view.php?nu=SABCS11L\\_1495&terms=](http://www.abstracts2view.com/sabcs11/view.php?nu=SABCS11L_1495&terms=)



70. Ellis P, Barrett-Lee P, Johnson L, *et al.* Sequential docetaxel as adjuvant chemotherapy for early breast cancer (TACT): an open-label, phase III, randomised controlled trial. *Lancet.* 2009;373:1681-92.
71. Roche H, Fumoleau P, Spielmann M, *et al.* Sequential adjuvant epirubicin-based and docetaxel chemotherapy for node-positive breast cancer patients: the FNCLCC PACS 01 Trial. *J Clin Oncol.* 2006;24:5664-71.
72. Coudert B, Campone M, Spielmann M, *et al.* Benefit of the sequential administration of docetaxel after standard FEC regimen for node-positive breast cancer: Long-term follow-up results of the FNCLCC-PACS 01 trial [abstract]. *Cancer Res.* 2009;69:Abstract no. 603.
73. Coudert B, Asselain B, Campone M, *et al.* Extended benefit from sequential administration of docetaxel after standard fluorouracil, epirubicin, and cyclophosphamide regimen for node-positive breast cancer: the 8-year follow-up results of the UNICANCER-PACS01 trial. *Oncologist.* 2012;17:900-9. Epub: 2012 May 23.
74. Penault-Llorca F, Andre F, Sagan C, *et al.* Ki67 expression and docetaxel efficacy in patients with estrogen receptor-positive breast cancer. *J Clin Oncol.* 2009;27:2809-15.
75. Jacquemier J, Boher JM, Roche H, *et al.* Protein expression, survival and docetaxel benefit in node-positive breast cancer treated with adjuvant chemotherapy in the FNCLCC - PACS 01 randomized trial. *Breast Cancer Res [serial on the Internet].* 13(6: R109 [14 p]) Available from: <http://breast-cancer-research.com/content/13/6/R109>
76. Ladoire S, Mignot G, Dalban C, *et al.* FOXP3 expression in cancer cells and anthracyclines efficacy in patients with primary breast cancer treated with adjuvant chemotherapy in the phase III UNICANCER-PACS 01 trial. *Ann Oncol.* 2012;23:2552-6. Epub: 2012 Mar 21.
77. Sakr H, Hamed RH, Anter AH, Yossef T. Sequential docetaxel as adjuvant chemotherapy for node-positive or/and T3 or T4 breast cancer: clinical outcome (Mansoura University). *Med Oncol.* 2013;30:457.
78. Coombes RC, Bliss JM, Espie M, *et al.* Randomized, phase III trial of sequential epirubicin and docetaxel versus epirubicin alone in postmenopausal patients with node-positive breast cancer. *J Clin Oncol.* 2011;29:3247-54.
79. Albert JM, Buzdar AU, Guzman R, *et al.* Prospective randomized trial of 5-fluorouracil, doxorubicin, and cyclophosphamide (FAC) versus paclitaxel and FAC (TFAC) in patients with operable breast cancer: impact of taxane chemotherapy on locoregional control. *Breast Cancer Res Treat.* 2011;128:421-7.
80. Martin M, Pienkowski T, Mackey J, *et al.* Adjuvant docetaxel for node-positive breast cancer. *N Engl J Med.* 2005;352:2302-13.
81. Mackey JR, Martin M, Pienkowski T, *et al.* Adjuvant docetaxel, doxorubicin, and cyclophosphamide in node-positive breast cancer: 10-year follow-up of the phase 3 randomised BCIRG 001 trial. *Lancet Oncol.* 2013;14:72-80.
82. Hugh J, Hanson J, Cheang MCU, *et al.* Breast cancer subtypes and response to docetaxel in node-positive breast cancer: Use of an immunohistochemical definition in the BCIRG 001 trial. *J Clin Oncol.* 2009;27:1168-76.
83. Dumontet C, Krajewska M, Treilleux I, *et al.* BCIRG 001 molecular analysis: prognostic factors in node-positive breast cancer patients receiving adjuvant chemotherapy. *Clin Cancer Res.* 2010;16:3988-97.
84. Martin M, Segui MA, Anton A, *et al.* Adjuvant docetaxel for high-risk, node-negative breast cancer. *N Engl J Med.* 2010;363:2200-10.
85. Goldstein LJ, O'Neill A, Sparano JA, *et al.* Concurrent doxorubicin plus docetaxel is not more effective than concurrent doxorubicin plus cyclophosphamide in operable breast cancer with 0

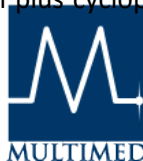

- to 3 positive axillary nodes: North American Breast Cancer Intergroup Trial E 2197. *J Clin Oncol*. 2008;26:4092-9.
86. Sparano JA, O'Neill A, Gray RJ, *et al*. 10-year update of E2197: Phase III doxorubicin/docetaxel (AT) versus doxorubicin/cyclophosphamide (AC) adjuvant treatment of LN+ and high-risk LN-breast cancer and the comparison of the prognostic utility of the 21-gene recurrence score (RS) with clinicopathologic features [abstract]. *J Clin Oncol*. 2012;30:Abstract no. 1021.
  87. Brain E, Debled M, Eymard J, *et al*. Final results of the RAPP-01 phase III trial comparing doxorubicin and docetaxel with doxorubicin and cyclophosphamide in the adjuvant treatment of high-risk node negative and limited node positive ( $\leq 3$ ) breast cancer patients [abstract]. *Cancer Res*. 2009;69:Abstract no. 4101.
  88. Del Mastro L, Costantini M, Durando A, *et al*. Cyclophosphamide, epirubicin, and 5-fluorouracil versus epirubicin plus paclitaxel in node-positive early breast cancer patients: A randomized, phase III study of Gruppo Oncologico Nord Ovest-Mammella Intergruppo Group [abstract]. *J Clin Oncol*. 2008;26:Abstract no. 516.
  89. Roché H, Allouache D, Romieu G, *et al*. Five-year analysis of the FNCLCC-PACS04 trial: FEC100 vs ED75 for the adjuvant treatment of node positive breast cancer [abstract]. *Cancer Res*. 2009;69:Abstract no. 602.
  90. Gianni L, Baselga J, Eiermann W, *et al*. Phase III trial evaluating the addition of paclitaxel to doxorubicin followed by cyclophosphamide, methotrexate, and fluorouracil, as adjuvant or primary systemic therapy: European Cooperative Trial in Operable Breast Cancer. *J Clin Oncol*. 2009;27:2474-81.
  91. Zambetti M, Baselga J, Eiermann W, *et al*. Freedom from progression (FFP) by adding paclitaxel (T) to doxorubicin (A) followed by CMF as adjuvant or primary systemic therapy: 10-yr results of a randomized phase III European Cooperative Trial in Operable Breast Cancer (ECTO) [abstract]. *J Clin Oncol*. 2013;31:Abstract no. 537.
  92. Jones S, Holmes FA, O'Shaughnessy J, *et al*. Docetaxel with cyclophosphamide is associated with an overall survival benefit compared with doxorubicin and cyclophosphamide: 7-year follow-up of US Oncology Research Trial 9735. *J Clin Oncol*. 2009;27:1177-83.
  93. Shulman LN, Berry DA, Cirincione CT, *et al*. Comparison of doxorubicin and cyclophosphamide versus single-agent paclitaxel as adjuvant therapy for breast cancer in women with 0 to 3 positive axillary nodes: CALGB 40101 (Alliance). *J Clin Oncol*. 2014;32:2311-7. Epub: 2014 Jun 18.
  94. Shulman LN, Cirincione CT, Berry DA, *et al*. Six cycles of doxorubicin and cyclophosphamide or paclitaxel are not superior to four cycles as adjuvant chemotherapy for breast cancer in women with zero to three positive axillary nodes: Cancer and Leukemia Group B 40101. *J Clin Oncol*. 2012;30:4071-6.
  95. Nitz U, Gluz O, Krepe H, *et al*. First interim toxicity analysis of the randomized phase III WSG plan B trial comparing 4xEC-4xDoc versus 6xTC in breast cancer patients with HER2 negative breast cancer (BC) [abstract]. *Cancer Res*. 2011;71:Abstract no. P5-18-03.
  96. Ortmann U, Salmen J, Hepp PGM, *et al*. The SUCCESS-C trial: Interim analysis of toxicity evaluating the role of an anthracycline-free chemotherapy regimen in the adjuvant treatment of HER2/neu-negative breast cancer. *J Clin Oncol*. 2011;29:Abstract no. 1070.
  97. Mansi JL, Yellowlees A, Lipscombe J, *et al*. Five-year outcome for women randomised in a phase III trial comparing doxorubicin and cyclophosphamide with doxorubicin and docetaxel as primary medical therapy in early breast cancer: an Anglo-Celtic Cooperative Oncology Group study. *Breast Cancer Res Treat*. 2010;122:787-94.
  98. Loesch D, Greco FA, Senzer NN, *et al*. Phase III multicenter trial of doxorubicin plus cyclophosphamide followed by paclitaxel compared with doxorubicin plus paclitaxel followed by

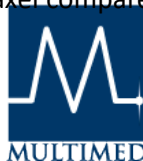

- weekly paclitaxel as adjuvant therapy for women with high-risk breast cancer. *J Clin Oncol*. 2010;28:2958-65.
99. Swain SM, Jeong J-H, Geyer CE, Jr., *et al*. Longer therapy, iatrogenic amenorrhea, and survival in early breast cancer. *N Engl J Med*. 2010;362:2053-65.
  100. Swain SM, Jeong J-H, Wolmark N. Amenorrhea from breast cancer therapy--not a matter of dose. *N Engl J Med*. 2010;363:2268-70.
  101. Ganz PA, Land SR, Geyer CE, Jr., *et al*. Menstrual history and quality-of-life outcomes in women with node-positive breast cancer treated with adjuvant therapy on the NSABP B-30 trial. *J Clin Oncol*. 2011;29:1110-6.
  102. Eiermann W, Pienkowski T, Crown J, *et al*. Phase III study of doxorubicin/cyclophosphamide with concomitant versus sequential docetaxel as adjuvant treatment in patients with human epidermal growth factor receptor 2-normal, node-positive breast cancer: BCIRG-005 trial. *J Clin Oncol*. 2011;29:3877-84.
  103. Poole CJ, Hiller L, Howard HC, *et al*. tAnGo: A randomized phase III trial of gemcitabine (gem) in paclitaxel-containing, epirubicin/cyclophosphamide-based, adjuvant chemotherapy (CT) for women with early-stage breast cancer (EBC) [abstract]. *J Clin Oncol*. 2008;26:Abstract no. 506.
  104. Sparano JA, Wang M, Martino S, *et al*. Weekly paclitaxel in the adjuvant treatment of breast cancer. *N Engl J Med*. 2008;358:1663-71. [Erratum in: *N Engl J Med*. 2008 Jul 3;359(1):106; *N Engl J Med*. 9 Apr 16;360(16):1685].
  105. Schneider BP, Zhao F, Wang M, *et al*. Neuropathy is not associated with clinical outcomes in patients receiving adjuvant taxane-containing therapy for operable breast cancer. *J Clin Oncol*. 2012;30:3051-7.
  106. Watanabe T, Kuranami M, Inoue K, *et al*. Phase III two by two factorial comparison of doxorubicin and cyclophosphamide followed by a taxane vs. a taxane alone, and paclitaxel vs. docetaxel in operable node positive breast cancer - results of the first interim analysis of NSASBC02 trial [abstract] *Cancer Res*. 2009;69:Abstract no. 4103. Poster available at <http://www.csp.or.jp/cspor/company/results/N-SAS%20BC02poster%2020081206.pdf> ( 2009 Jan 6, cited 2012 Aug).
  107. Shiroywa T, Fukuda T, Shimosuma K, *et al*. Comparison of EQ-5D scores among anthracycline-containing regimens followed by taxane and taxane-only regimens for node-positive breast cancer patients after surgery: the N-SAS BC 02 trial. *Value Health*. 2011;14:746-51.
  108. Shimosuma K, Ohashi Y, Takeuchi A, *et al*. Taxane-induced peripheral neuropathy and health-related quality of life in postoperative breast cancer patients undergoing adjuvant chemotherapy: N-SAS BC 02, a randomized clinical trial. *Support Care Cancer*. 2012;20:3355-64.
  109. Swain SM, Tang G, Geyer CE, *et al*. NSABP B-38: Definitive analysis of a randomized adjuvant trial comparing dose-dense (DD) AC->paclitaxel (P) plus gemcitabine (G) with DD AC->P and with docetaxel, doxorubicin, and cyclophosphamide (TAC) in women with operable, node-positive breast cancer [abstract]. *J Clin Oncol*. 2012;30:Abstract no. LBA1000.
  110. Swain SM, Tang G, Geyer CE, Jr., *et al*. Definitive results of a phase III adjuvant trial comparing three chemotherapy regimens in women with operable, node-positive breast cancer: the NSABP B-38 trial. *J Clin Oncol*. 2013;31:3197-204. Epub: 2013 Aug 14.
  111. Moebus V, Jackisch C, Lueck H-J, *et al*. Intense dose-dense sequential chemotherapy with epirubicin, paclitaxel, and cyclophosphamide compared with conventionally scheduled chemotherapy in high-risk primary breast cancer: mature results of an AGO phase III study. *J Clin Oncol*. 2010;28:2874-80.
  112. Moebus V, Thomssen C, Lueck H, *et al*. Intense dose-dense (IDD) sequential chemotherapy with epirubicin (E), paclitaxel (T), and cyclophosphamide (C) (ETC) compared with conventionally

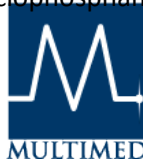

- scheduled chemotherapy in high-risk breast cancer patients (> 3+LN): Eight-year follow-up analysis [abstract]. *J Clin Oncol*. 2011;29:Abstract no. 1018.
113. Kelly CM, Green MC, Broglio K, *et al*. Phase III trial evaluating weekly paclitaxel versus docetaxel in combination with capecitabine in operable breast cancer. *J Clin Oncol*. 2012;30:930-5. Epub: 2012 Feb 15.
  114. Hofmann D, Nitz U, Gluz O, *et al*. WSG ADAPT - adjuvant dynamic marker-adjusted personalized therapy trial optimizing risk assessment and therapy response prediction in early breast cancer: Study protocol for a prospective, multi-center, controlled, non-blinded, randomized, investigator initiated phase II/III trial. 2013 [cited 2014 Jul 16]. *Trials* [serial on the Internet]. 14(1) Available from: <http://www.trialsjournal.com/content/14/1/261>
  115. Untch M, von Minckwitz G, Konecny GE, *et al*. PREPARE trial: a randomized phase III trial comparing preoperative, dose-dense, dose-intensified chemotherapy with epirubicin, paclitaxel, and CMF versus a standard-dosed epirubicin-cyclophosphamide followed by paclitaxel with or without darbepoetin alfa in primary breast cancer--outcome on prognosis. *Ann Oncol*. 2011;22:1999-2006.
  116. Untch M, Fasching PA, Konecny GE, *et al*. PREPARE trial: a randomized phase III trial comparing preoperative, dose-dense, dose-intensified chemotherapy with epirubicin, paclitaxel and CMF versus a standard-dosed epirubicin/cyclophosphamide followed by paclitaxel +/- darbepoetin alfa in primary breast cancer--results at the time of surgery. *Ann Oncol*. 2011;22:1988-98.
  117. Kaufmann M, Eiermann W, Schuette M, *et al*. Long-term results from the neoadjuvant GeparDuo trial: A randomized, multicenter, open phase III study comparing a dose-intensified 8-week schedule of doxorubicin hydrochloride and docetaxel (ADoc) with a sequential 24-week schedule of doxorubicin hydrochloride/cyclophosphamide followed by docetaxel (AC-Doc) regimen as preoperative therapy (NACT) in patients (pts) with operable breast cancer (BC) [abstract]. *J Clin Oncol*. 2010;28:Abstract no. 537. Poster also available at <http://www.germanbreastgroup.de/en/publications.html> [cited 2012 Jul 6].
  118. Darb-Esfahani S, Loibl S, Muller BM, *et al*. Identification of biology-based breast cancer types with distinct predictive and prognostic features: role of steroid hormone and HER2 receptor expression in patients treated with neoadjuvant anthracycline/taxane-based chemotherapy. *Breast Cancer Res*. 2009;11:R69.
  119. Untch M, Mobus V, Kuhn W, *et al*. Intensive dose-dense compared with conventionally scheduled preoperative chemotherapy for high-risk primary breast cancer. *J Clin Oncol*. 2009;27:2938-45.
  120. Evans TRJ, Yellowlees A, Foster E, *et al*. Phase III randomized trial of doxorubicin and docetaxel versus doxorubicin and cyclophosphamide as primary medical therapy in women with breast cancer: an anglo-celtic cooperative oncology group study. *J Clin Oncol*. 2005;23:2988-95.
  121. von Minckwitz G, Blohmer JU, Costa SD, *et al*. Response-guided neoadjuvant chemotherapy for breast cancer. *J Clin Oncol*. 2013;31:3623-30.
  122. Von Minckwitz G, Schmitt WD, Loibl S, *et al*. Ki67 measured after neoadjuvant chemotherapy for primary breast cancer. *Clin Cancer Res*. 2013;19:4521-31.
  123. von Minckwitz G, Kummel S, Vogel P, *et al*. Neoadjuvant vinorelbine-capecitabine versus docetaxel-doxorubicin-cyclophosphamide in early nonresponsive breast cancer: phase III randomized GeparTrio trial. *J Natl Cancer Inst*. 2008;100:542-51.
  124. von Minckwitz G, Kummel S, Vogel P, *et al*. Intensified neoadjuvant chemotherapy in early-responding breast cancer: phase III randomized GeparTrio study. *J Natl Cancer Inst*. 2008;100:552-62.



Supplement: CONC-22-S82-s001.pdf [file CONC-22-S82-s001.pdf]
